# Supplementary material for: Metabolomic analysis of rice cultivars from diverse production areas
Source: PeerJ journal article supplement (doi:10.7717/peerj.18496), 2024-11-19
Supplement: raw_data.xlsx [file raw_data.xlsx]

## Sheet: Sheet1
Index	Q1 (Da)	Q3 (Da)	Molecular Weight (Da)	Formula	Ionization model	Compounds	Class I	Class II	CAS	Level	MSD502-1	MSD502-2	MSD502-3	MSR88-1	MSR88-2	MSR88-3	LHR88-1	LHR88-2	LHR88-3	LHHG-1	LHHG-2	LHHG-3	QS-1	QS-2	QS-3	mix01	mix02	mix03	mix04
pme3200	74	57	73.064	C2H7N3	[M+H]+	1-methylguanidine	Nucleotides and derivatives	Nucleotides and derivatives	471-29-4	3	36820	29576	27204	23119	17054	26277	15324	24488	39673	35289	22450	32190	24292	28773	26072	36151	19819	21811	33712
mws0217	76.04	29.99	75.032	C2H5NO2	[M+H]+	L-Glycine	Amino acids and derivatives	Amino acids and derivatives	56-40-6	3	100990	125480	95914	163360	157100	174160	190300	162480	169630	44438	41932	47851	149720	146110	156210	100630	110920	109630	136570
pmb0782	86.1	69.2	85.089	C5H11N	[M+H]+	Piperidine	Alkaloids	Alkaloids	110-89-4	3	396800	466250	327440	401440	211740	485400	310280	164530	318160	250300	196830	217220	155460	191660	196940	213970	212750	180550	239140
pme1974	87.01	43	88.016	C3H4O3	[M-H]-	Pyruvic acid	Organic acids	Organic acids	127-17-3	3	27439	33794	18034	11390	13768	16957	23785	7183.4	15102	31762	33725	38092	23199	29374	26257	39388	24643	27462	25133
pme1987	88.05	71	89.048	C3H7NO2	[M-H]-	L-Alanine	Amino acids and derivatives	Amino acids and derivatives	56-41-7	1	1181	1179	3026	6496.8	2947.5	4142.2	1768.5	4772	1228.5	596.5	2370.2	2474.5	2946.2	3566.5	4836	3554.5	3555.5	4187.8	1781.2
ML10198895	88.04	88.04	89.048	C3H7NO2	[M-H]-	N-Methylglycine	Amino acids and derivatives	Amino acids and derivatives	107-97-1	3	2958.8	2358	2358	5342.2	5366.8	8898.5	2984.2	4878.5	2337	2527	601.75	2386	1777.8	5562.5	3590.2	3000	7199.8	3573.8	3578.2
MWS2040	94.98	79.96	95.988	CH4O3S	[M-H]-	Methanesulfonic acid	Organic acids	Organic acids	75-75-2	3	291050	238080	225790	261490	219640	281920	318590	248420	329870	224230	232500	251460	280380	288630	310430	302360	229950	252010	285600
MWSmce331	102.05	56.05	101.048	C4H7NO2	[M+H]+	Azetidine-2-carboxylic acid	Alkaloids	Alkaloids	2517-04-6	3	466850	475130	465810	468510	413950	534460	369960	245900	311750	459740	475840	525140	280180	329290	339940	376810	421090	358800	410110
mws4052	102.05	56.05	101.048	C4H7NO2	[M+H]+	1-Aminocyclopropane-1-carboxylic acid	Organic acids	Organic acids	22059-21-8	2	252800	231220	248970	264260	233910	273660	170050	122230	178840	288730	281130	298600	142300	150140	199480	208140	169040	215740	227940
MWSmce461	102.05	56.05	101.048	C4H7NO2	[M+H]+	L-Azetidine-2-carboxylic acid	Amino acids and derivatives	Amino acids and derivatives	2133-34-8	3	429780	482520	525670	443130	423970	488460	321050	307580	322310	519920	512270	508480	283980	295740	366400	329140	381060	365280	410650
MWStz073	102.05	84.05	101.048	C4H7NO2	[M+H]+	5-Hydroxy-2-pyrrolidinone	Alkaloids	Pyrrole alkaloids	62312-55-4	3	42620	36818	32728	54668	27117	27616	16220	19054	18706	52933	55654	64219	30048	47742	52466	49881	28714	43660	45564
pme1841	103.12	86.1	102.116	C5H14N2	[M+H]+	Cadaverine	Alkaloids	Phenolamine	462-94-2	3	456750	713440	389380	562980	359510	834680	2572100	1718100	4301300	112310	83068	107190	953220	1472700	2304900	740500	797400	782500	736900
pme3011	104.07	68.8	103.063	C4H9NO2	[M+H]+	γ-Aminobutyric acid	Organic acids	Organic acids	56-12-2	2	1483000	3873600	2127700	2936700	1692500	3057300	2028300	1533500	2100100	339770	310910	298450	1129800	1224100	1449800	1157400	1311900	1391700	1395300
pme3017	104.07	58	103.063	C4H9NO2	[M+H]+	2-Aminoisobutyric acid	Amino acids and derivatives	Amino acids and derivatives	62-57-7	2	2878800	2881000	2812700	5509300	5488400	5096000	5634500	5683000	6306500	2134700	2245200	2195300	3359400	3268400	4099400	3018700	3351200	3031700	2907000
MWSmce585	104.07	59.01	103.063	C4H9NO2	[M+H]+	Methyl 3-aminopropanoate	Amino acids and derivatives	Amino acids and derivatives	4138-35-6	2	3097300	2984300	2844900	6392200	5466300	6303600	6060400	7272000	6767400	2592800	2280500	2529900	3809800	4359700	4832200	3055900	3530600	3498500	3567700
pme3033	104.07	86	103.063	C4H9NO2	[M+H]+	N,N-Dimethylglycine	Amino acids and derivatives	Amino acids and derivatives	1118-68-9	2	1197400	2688400	1555400	2281700	1457800	2310000	1756800	1390900	1830600	357950	329990	321920	1076000	980970	1257200	987160	1098600	1128600	1026600
pmb0484	104.1	60.1	103.091	C5H13NO	[M+H]+	Choline	Alkaloids	Alkaloids	62-49-7	1	27980000	27444000	25095000	50615000	50411000	47478000	52162000	55455000	53965000	22894000	21580000	23305000	30237000	37096000	32786000	28495000	31004000	32141000	30188000
mws0576	103.04	59.1	104.047	C4H8O3	[M-H]-	3-Hydroxybutyric acid	Organic acids	Organic acids	300-85-6	2	732800	703280	431410	867820	695950	609950	564160	571980	533440	266060	326090	272140	729210	773590	592890	959590	608740	722100	544070
pme1975	103	59	104.06	C3H4O4	[M-H]-	Malonic acid	Organic acids	Organic acids	141-82-2	3	358570	423390	409190	673280	532190	671760	425760	341400	319240	232180	252240	203660	579620	599020	552390	556910	524110	551940	451600
pme0010	106	60	105.043	C3H7NO3	[M+H]+	L-Serine	Amino acids and derivatives	Amino acids and derivatives	56-45-1	1	3560400	4103500	4293900	4647100	3743200	5501300	3110500	2859600	3153900	3446600	3631800	3459300	2314800	2544600	3052600	2564600	2463400	2621800	3068800
pme0048	108.01	64	109.02	C2H7NO2S	[M-H]-	2-Aminoethanesulfinic acid	Organic acids	Organic acids	300-84-5	2	4177.2	9549.8	5932.5	8997	9596.8	7114.5	10200	7893.8	17972	5307.2	4175.5	4198.5	5989.5	9673.2	8288.8	11236	6055.8	3598.2	8308.2
MWS5173	112.05	70.03	111.043	C4H5N3O	[M+H]+	Isocytosine	Nucleotides and derivatives	Nucleotides and derivatives	108-53-2	2	14900	26326	17310	21990	13004	26022	9023.2	14527	20531	9819.8	15211	27247	10802	19681	12394	26700	14676	18917	21700
mws0255	112.05	95	111.043	C4H5N3O	[M+H]+	Cytosine	Nucleotides and derivatives	Nucleotides and derivatives	71-30-7	1	222560	284310	286680	353330	236010	302130	192740	204490	309100	178540	205280	185460	207360	272990	249420	247080	234940	221130	247090
pme2122	112.09	95	111.08	C5H9N3	[M+H]+	Histamine	Amino acids and derivatives	Amino acids and derivatives	51-45-6	1	224590	206040	238210	319440	229940	310420	200530	164220	340940	167510	154040	170770	188400	240560	250370	168720	240180	194570	217830
pme0257	111.02	80	112.027	C4H4N2O2	[M-H]-	Uracil	Nucleotides and derivatives	Nucleotides and derivatives	66-22-8	1	150370	215910	137200	143580	192060	177900	165370	174000	149890	146720	156950	157420	180490	165650	143100	138860	192200	200480	139160
pme1936	114.07	86	113.059	C4H7N3O	[M+H]+	Creatinine	Organic acids	Organic acids	60-27-5	2	8311	10761	6521.5	9916.6	10702	9657.8	7470.5	7785	6070.2	5991.2	4721.8	5970.3	7835.2	5349	4962.3	9229.5	9685.7	6142	4758
pme0151	115	98.2	114.043	C4H6N2O2	[M+H]+	5,6-Dihydrouracil	Nucleotides and derivatives	Nucleotides and derivatives	504-07-4	3	17672	16778	25810	20734	21662	25594	32460	34998	19682	30264	25917	22537	27980	17796	33247	11753	13223	17759	14220
MWS2056	115.08	69.07	114.068	C6H10O2	[M+H]+	Delta-Hexalactone	Others	Others	823-22-3	3	112690	133820	119280	121590	114220	132490	126090	108530	145260	103830	124340	160520	131880	154900	153140	31008	66926	61308	62150
pme0006	116.07	70.1	115.063	C5H9NO2	[M+H]+	L-Proline	Amino acids and derivatives	Amino acids and derivatives	147-85-3	1	15681000	19618000	19887000	21737000	12601000	26384000	17368000	14153000	17668000	8539100	9960200	11210000	7084200	9585600	12502000	10884000	12163000	12055000	12132000
mws0376	115	71	116.011	C4H4O4	[M-H]-	Fumaric acid	Organic acids	Organic acids	110-17-8	1	296220	305690	106180	128490	112260	81430	88201	121310	96620	230090	239460	156080	195590	121110	131910	178830	132720	162210	271200
pme3193	116.04	74	117.043	C4H7NO3	[M-H]-	N-Acetyl-L-glycine	Amino acids and derivatives	Amino acids and derivatives	543-24-8	2	12265	6740.3	6473.3	5227.6	5574.3	6887.9	8221.5	5944.9	7045.8	4626.2	3640.4	4307.7	7400.6	11552	7662.8	7359.5	7393.9	7183.8	5743
pmb1096	118.07	91	117.058	C8H7N	[M+H]+	Indole	Alkaloids	Plumerane	120-72-9	2	27768	31918	22900	21494	29830	42571	18874	34038	19240	28840	17314	14458	29540	30592	20640	28624	25588	19867	21790
mws0256	118.09	72.1	117.079	C5H11NO2	[M+H]+	L-Valine	Amino acids and derivatives	Amino acids and derivatives	72-18-4	1	18588000	20275000	19029000	20441000	13225000	23145000	17659000	14610000	19493000	13454000	12587000	14656000	9158700	11176000	24087000	13044000	13837000	14147000	15244000
pme0120	118.09	101	117.079	C5H11NO2	[M+H]+	5-Aminovaleric acid	Amino acids and derivatives	Amino acids and derivatives	660-88-8	2	34956	30907	30165	33162	49608	47405	57900	38116	75434	45038	18974	70336	22414	26119	41718	21882	26696	36331	26646
MWS5209	235.16	118.09	117.079	C5H11NO2	[2M+H]+	N-Methyl-α-aminoisobutyric acid	Amino acids and derivatives	Amino acids and derivatives	2566-34-9	1	2231300	2436200	2665200	1337200	801120	1662100	4856500	3307700	4652500	2763100	2975200	2159300	2872700	5436900	4256700	2460300	2440100	2563600	3083100
MWSmce548	118.09	58.07	117.079	C5H11NO2	[M+H]+	Betaine	Alkaloids	Alkaloids	107-43-7	1	13827000	12250000	12730000	11788000	9265100	12308000	20439000	16748000	20334000	12277000	12353000	12705000	15086000	19506000	17755000	13159000	14239000	13799000	15399000
mws0470	117.02	73	118.027	C4H6O4	[M-H]-	Methylmalonic acid*	Organic acids	Organic acids	516-05-2	1	1071300	1262000	1843000	2204200	1415900	2170800	1363800	1034300	1345200	754370	577410	720890	1566300	1932100	1492100	1553900	1575400	1471200	1459500
mws0192	117.02	73	118.027	C4H6O4	[M-H]-	Succinic acid*	Organic acids	Organic acids	110-15-6	2	1157500	1258400	1760500	2091300	1473200	2041900	1153500	1005900	1254000	750460	577910	631110	1545600	1745700	1399800	1548400	1516200	1473500	1529700
mws0147	117.06	59	118.063	C5H10O3	[M-H]-	β-Hydroxyisovaleric acid	Organic acids	Organic acids	625-08-1	2	117310	115200	98557	107200	103860	111750	114840	79213	109920	45613	44742	61460	80407	109960	139220	101940	108460	91048	97761
pme3096	118	74	119.022	C3H5NO4	[M-H]-	Aminomalonic acid	Organic acids	Organic acids	1068-84-4	3	42046	58155	48447	64215	63136	73393	34452	32376	44401	28208	30030	31871	44490	61507	41380	49561	45265	56123	51199
mws0671	120.07	74.1	119.058	C4H9NO3	[M+H]+	L-Homoserine*	Organic acids	Organic acids	672-15-1	2	3286800	3904000	3439100	3659700	2425600	4405000	3250100	2849000	3625900	2387400	2439000	2676200	1728600	2211700	2665500	2206000	2300600	2292400	2450800
mws0230	120.07	74	119.058	C4H9NO3	[M+H]+	L-Threonine*	Amino acids and derivatives	Amino acids and derivatives	72-19-5	1	3119300	3209200	3311500	3351800	2422600	4207000	3210600	2622800	3436800	2444300	2454900	2548500	1945600	2071800	2627200	1969900	2274200	2192800	2365800
MWS5147	119.02	59.01	120.025	C4H8O2S	[M-H]-	3-(Methylthio)Propionic Acid	Organic acids	Organic acids	646-01-5	3	1695700	1741200	1684400	1917600	1641000	1910400	1917200	1871200	1673100	1853900	1953400	2048300	1887400	2102400	1800700	1882900	2001700	1802200	1740700
pme0195	120.02	62	121.02	C3H7NO2S	[M-H]-	L-Cysteine	Amino acids and derivatives	Amino acids and derivatives	52-90-4	3	79464	94301	82541	47127	52492	60927	86102	89662	98644	89858	98758	106760	100280	106390	87264	76043	58393	87770	73148
pmb0069	122	105	121.053	C7H7NO	[M+H]+	Benzamide	Phenolic acids	Phenolic acids	55-21-0	3	56397	89785	99015	45666	31850	77835	72705	33979	123870	2956.7	1331.4	7938.8	29473	43104	87616	42939	42818	35465	36771
mws0628	121.03	92	122.037	C7H6O2	[M-H]-	4-Hydroxybenzaldehyde	Phenolic acids	Phenolic acids	123-08-0	1	2944000	2506100	2516300	2229700	2228400	2427300	889820	798650	916430	1653800	1539200	1545400	2284900	2118800	2167700	2055000	1966200	2142300	1997400
mws0133	123.06	80.05	122.048	C6H6N2O	[M+H]+	Nicotinamide	Others	Vitamin	98-92-0	1	132860	127670	120390	127250	87724	110600	86228	66857	86408	65343	61704	82452	107460	119010	100040	74545	88634	94019	93338
MWS1978	121.07	59.01	122.073	C8H10O	[M-H]-	2,6-Xylenol	Phenolic acids	Phenolic acids	576-26-1	3	1133	378.01	1277.6	614.83	924.28	2086	779.91	1935.3	993.12	684.68	519.43	2514.8	685.2	1588.1	995.9	1475.1	1135.7	590.47	851.62
pme1216	122.03	78	123.032	C6H5NO2	[M-H]-	2-Picolinic acid	Organic acids	Organic acids	98-98-6	3	210960	234360	167210	391750	288020	381350	366750	306150	349540	109030	114860	113740	348880	432780	370260	325070	234120	337310	314860
pme0490	124.04	78	123.032	C6H5NO2	[M+H]+	Nicotinic acid (Vitamin B3)	Others	Vitamin	59-67-6	1	695300	711740	588800	1418500	1246100	1402000	1347600	1143700	1413500	422260	370060	411960	1342100	1427600	1279400	1061800	1135400	1111100	1180400
Lmbp000668	124.04	78.03	123.032	C6H5NO2	[M+H]+	Isonicotinic acid	Organic acids	Organic acids	55-22-1	1	675240	678950	611490	1453400	1356800	1420500	1301100	1214500	1335100	430890	388140	403760	1370900	1538500	1292600	1050000	1162000	1084500	1222300
mws0236	124.01	80	125.015	C2H7NO3S	[M-H]-	2-Aminoethanesulfonic acid	Organic acids	Organic acids	107-35-7	2	90516	115020	140940	128570	106080	126830	153990	167660	177030	150070	131650	157910	172720	183200	153720	224350	168720	177940	202350
MWSmce704	127.02	65.04	126.014	C6H6OS	[M+H]+	5-Methyl-2-thiophenecarboxaldehyde	Others	Others	13679-70-4	3	11553	9008.5	10443	6008.7	8345.9	11172	13712	12327	10715	5345.6	5568.8	6205.2	6025.8	5639.9	6611.4	8380.4	9228.1	7867.4	7856.9
mws0251	127.05	110	126.043	C5H6N2O2	[M+H]+	Thymine	Nucleotides and derivatives	Nucleotides and derivatives	65-71-4	1	27600	34253	31286	23393	12821	12662	21105	14375	29948	5373.9	8679.5	7130.1	16117	27817	11979	15697	18063	20573	23588
MWSmce118	127.05	81.04	126.043	C5H6N2O2	[M+H]+	Imidazole-4-Acetic Acid	Organic acids	Organic acids	645-65-8	3	682150	845280	682700	793680	895930	989880	771450	863830	800140	593830	732850	622920	783440	738900	736480	530880	654670	726430	737740
MWSmce448	127.05	81.04	126.043	C5H6N2O2	[M+H]+	Imidazol-1-yl-acetic acid	Organic acids	Organic acids	22884-10-2	3	673100	805860	741680	1004500	805680	778800	774200	922950	651610	596500	705930	513960	752480	755740	735230	589350	740130	633030	681400
MWSmce706	129.07	56.05	128.059	C5H8N2O2	[M+H]+	Cyclo(Ala-Gly)	Amino acids and derivatives	Amino acids and derivatives	4526-77-6	3	137220	117890	121430	96120	75928	141330	116820	146180	126160	109250	109290	119090	229840	170320	197610	158620	177190	141440	199170
pmb0785	130.07	103.3	129.058	C9H7N	[M+H]+	Isoquinoline	Alkaloids	Isoquinoline alkaloids	119-65-3	1	36205	22195	31076	27019	33120	24381	37329	43602	37793	88560	68302	89433	79668	65007	62566	66319	72135	66848	88089
MWS0811	130.09	84.08	129.079	C6H11NO2	[M+H]+	DL-Pipecolic Acid	Organic acids	Organic acids	3105-95-1	2	1876800	1788100	1850900	2733600	2318000	2927500	1958700	2232800	2799500	543590	369390	452630	1505000	1730400	1878600	1570200	1536400	1317100	1375000
ML10181668	130.09	84.08	129.079	C6H11NO2	[M+H]+	Cycloleucine	Amino acids and derivatives	Amino acids and derivatives	52-52-8	1	6484500	6301500	6435300	6539100	5738200	7275100	4192200	3301100	4647400	3541800	3437700	3922800	2450900	3099400	3539300	3413100	3493000	3280000	2988200
Zmdp000376	130.09	84.08	129.09	C5H11N3O	[M+H]+	4-Guanidinobutanal	Others	Others	-	2	6699600	6729500	6297100	6760900	6326700	7582000	4515900	4646900	5585700	4051200	4594300	4805300	3508200	3447200	3916800	3631100	4009800	3978700	4366900
pme2693	131.12	114.09	130.111	C6H14N2O	[M+H]+	N-Acetylputrescine	Alkaloids	Phenolamine	18233-70-0	2	16376	38099	34380	22633	9581	14879	24835	13788	20680	5335.2	949.5	3795.6	11589	17157	15221	14534	9337	15551	18893
pmb0501	131.13	114.1	130.122	C5H14N4	[M+H]+	Agmatine	Alkaloids	Phenolamine	306-60-5	2	22158	32023	25131	32540	12101	27828	25492	18591	31503	7204.1	6961.1	5833.2	8721.8	13381	18638	10787	13872	9915.7	17032
pmf0470	132.07	73	131.058	C5H9NO3	[M+H]+	cis-4-Hydroxy-D-proline	Amino acids and derivatives	Amino acids and derivatives	2584-71-6	3	9	9	9	9	9	9	9	9	9	9	9	9	94449	154390	84179	66729	67816	64316	63087
MWS2413	130.05	58.03	131.058	C5H9NO3	[M-H]-	N-acetyl-beta-alanine	Amino acids and derivatives	Amino acids and derivatives	3025-95-4	3	16801	16842	16064	16687	19131	15533	36234	31576	27544	6720.3	6219	4986.9	20886	20558	18025	28469	19143	18523	17958
mws0216	132.07	86	131.058	C5H9NO3	[M+H]+	Trans-4-Hydroxy-L-proline*	Amino acids and derivatives	Amino acids and derivatives	51-35-4	2	320090	353910	423750	304120	278560	490780	489190	590550	417380	258300	349110	203770	459990	499310	409900	368070	251420	295820	483490
pma3649	132.1	86.1	131.058	C5H9NO3	[M+H]+	5-Aminolevulinate*	Alkaloids	Alkaloids	106-60-5	3	3979500	5117500	4587300	5285400	2823400	5277800	4223500	2405700	4207400	2315300	2762000	3697300	1760700	2186900	2635700	2170000	2139000	2410700	2430900
Zmpn000638	130.05	88.04	131.069	C4H9N3O2	[M-H]-	3-Guanidinopropionic acid	Organic acids	Organic acids	353-09-3	3	40129	43776	48433	47186	23793	39355	43875	40823	48535	21514	22667	17206	46842	44283	63955	42678	46117	42360	46622
pme0274	132.1	69	131.095	C6H13NO2	[M+H]+	6-Aminocaproic acid	Organic acids	Organic acids	60-32-2	2	524530	688580	635610	650230	378910	645670	509990	309700	411340	352170	396440	468330	198830	275510	339400	272950	273360	323270	323700
pmp001198	132.1	57.1	131.095	C6H13NO2	[M+H]+	6-Deoxyfagomine	Alkaloids	Alkaloids	197449-09-5	1	583200	777600	624360	753480	439370	832700	537900	419910	569620	506890	337800	528770	250070	348870	373720	356750	361870	361380	412500
mws0258	132.1	86	131.095	C6H13NO2	[M+H]+	L-Isoleucine*	Amino acids and derivatives	Amino acids and derivatives	73-32-5	1	10089000	10100000	8253100	9639800	6818600	12564000	7367800	5142900	8147900	6017900	5896800	6389700	4539200	5310700	5547600	4745800	6167900	4917100	6400900
mws0227	132.1	86.2	131.095	C6H13NO2	[M+H]+	L-Leucine*	Amino acids and derivatives	Amino acids and derivatives	61-90-5	1	9798900	10263000	8604000	9474100	7040300	11509000	7492800	4942400	8554100	6210200	5390700	6210700	4289100	5085000	5335900	4773100	5780100	5103400	6331300
mws1587	132.1	86	131.095	C6H13NO2	[M+H]+	L-Norleucine	Amino acids and derivatives	Amino acids and derivatives	327-57-1	1	10354000	10313000	10390000	12528000	6498500	13474000	12596000	6523000	15006000	4198600	4230300	7120000	5175800	6390200	8173300	5280600	5617600	5910200	6758700
Lmmn002164	131.03	87.05	132.042	C5H8O4	[M-H]-	Monomethyl succinate*	Organic acids	Organic acids	3878-55-5	3	10936	13381	15274	18945	15277	11980	14202	9617.3	19627	8513.3	7809	11865	15571	19365	20830	13187	17242	13960	18574
mws0473	131.03	87.05	132.042	C5H8O4	[M-H]-	2-Methylsuccinic acid*	Organic acids	Organic acids	498-21-5	2	128580	102350	95495	129420	130830	128470	146340	158230	162260	74951	73673	101900	173090	175030	177520	146830	147400	154670	153850
Lmbn001288	131.03	87.04	132.042	C5H8O4	[M-H]-	2-Hydroxy-2-methyl-3-oxobutanoic acid*	Organic acids	Organic acids	71698-08-3	3	14439	15117	8300.3	10271	15551	13040	13523	10539	9826.7	13003	3770.4	7362.9	20548	23044	15883	15742	15623	13800	17920
Lmmn000806	131.03	87.05	132.042	C5H8O4	[M-H]-	Dimethylmalonic acid*	Organic acids	Organic acids	595-46-0	3	14504	11648	9834.2	16552	14507	16479	16485	16809	15434	13160	9087.5	10335	17370	16600	17546	15719	18356	14152	8869.7
pme0243	131.03	87.05	132.042	C5H8O4	[M-H]-	Glutaric acid	Organic acids	Organic acids	110-94-1	3	61510	60929	71555	78757	45829	56180	76971	67183	94933	23563	20340	11744	63258	75643	76151	65505	66278	42432	66850
Lmgn000160	131.05	70.03	132.053	C4H8N2O3	[M-H]-	3-Ureidopropionic Acid	Organic acids	Organic acids	462-88-4	1	258630	307980	274170	243980	261000	257360	450880	519870	361760	367140	407610	350130	400060	394490	321690	408260	349010	346100	366880
mws0001	133.06	74	132.054	C4H8N2O3	[M+H]+	L-Asparagine	Amino acids and derivatives	Amino acids and derivatives	70-47-3	1	19380000	20919000	23481000	19391000	20103000	20934000	27913000	30409000	25443000	27871000	31756000	27987000	24815000	25857000	25971000	24288000	24164000	23179000	24530000
mws0972	131.07	85	132.079	C6H12O3	[M-H]-	6-Hydroxyhexanoic acid	Organic acids	Organic acids	1191-25-9	2	10131	16232	15136	29434	19617	30546	23161	19032	21126	5034.9	6659.7	10374	18002	18129	22305	17033	17168	23329	22101
mws0341	131.07	85	132.079	C6H12O3	[M-H]-	2-Hydroxyisocaproic acid	Organic acids	Organic acids	20312-37-2	2	150310	164850	202760	116910	127080	115160	91163	61546	56051	27685	17144	22961	92014	84438	81315	100220	68682	83880	83256
pme2527	133	116	132.09	C5H12N2O2	[M+H]+	L-Ornithine	Amino acids and derivatives	Amino acids and derivatives	70-26-8	3	1366300	1441000	1559600	1289700	1334700	1421900	1968200	2006100	1692800	1921900	2087100	1855900	1975600	1830900	1824900	1621000	1678100	1611300	1749700
MWS1882	132.03	88.04	133.038	C4H7NO4	[M-H]-	Iminodiacetic acid	Organic acids	Organic acids	142-73-4	1	214530	269280	400390	292620	323610	312030	455840	364530	377860	338600	285410	389270	340570	359530	328870	267780	290380	229400	279260
MWSmce609	134.04	74.02	133.038	C4H7NO4	[M+H]+	L-Aspartic acid	Amino acids and derivatives	Amino acids and derivatives	56-84-8	1	3311400	2745100	3481500	3458500	3731700	3727900	3903700	3633600	3629300	3306400	3870300	3374200	3742600	3568600	3501400	3001800	3322800	3004900	3348400
mws0275	133.01	71.01	134.022	C4H6O5	[M-H]-	L-Malic acid*	Organic acids	Organic acids	97-67-6	1	658680	536460	414690	1058500	616830	999190	552420	262360	711300	317370	327280	401640	571830	864330	583840	873150	557920	730330	798780
MWS1709	133.01	71.01	134.022	C4H6O5	[M-H]-	D-Malic acid	Organic acids	Organic acids	636-61-3	1	203080	124090	120780	310720	172070	249950	142450	85094	197610	91512	84202	137810	148690	206190	193180	169510	204810	168110	227680
Lmbn000198	133.01	71.01	134.022	C4H6O5	[M-H]-	3-Dehydro-L-Threonic Acid*	Organic acids	Organic acids	-	1	159760	212020	194160	399250	213510	334260	201040	110750	259100	124700	69264	120300	272320	287930	245190	220620	218980	217750	268200
Zmgn000503	133.05	71.01	134.058	C5H10O4	[M-H]-	2,3-Dihydroxy-3-Methylbutanoic Acid	Organic acids	Organic acids	1756-18-9	2	306910	307290	314180	432920	271720	395130	212710	124350	293370	282340	192360	256000	336060	448840	334570	361750	378630	410210	415590
Zmdp000972	136.04	91.05	135.035	C4H9NO2S	[M+H]+	S-Methyl-L-cysteine	Amino acids and derivatives	Amino acids and derivatives	1187-84-4	2	241530	259070	209270	340230	178350	302360	257820	198380	325060	130030	119710	172810	135560	161210	199560	136960	166260	139990	161640
pmb0374	136.06	118.9	135.054	C5H5N5	[M+H]+	2-Aminopurine	Nucleotides and derivatives	Nucleotides and derivatives	452-06-2	1	63456	60779	52250	89039	70073	89454	60616	70167	76136	30089	37670	42484	62038	56075	61132	46704	54646	40163	49985
pme0040	136.06	119	135.054	C5H5N5	[M+H]+	Adenine	Nucleotides and derivatives	Nucleotides and derivatives	73-24-5	1	831410	1514700	1426600	2653600	2221800	2777800	1845400	1686800	1821600	736050	505700	703670	2819300	2845000	2435200	2279200	2512200	2259600	2622600
Lmgp000659	136.08	91.05	135.068	C8H9NO	[M+H]+	2-Phenylacetamide*	Alkaloids	Alkaloids	103-81-1	3	241660	237150	204720	308560	172490	310230	219130	184490	284390	127170	104860	170640	134060	151990	170570	125190	157190	137520	150370
HJKP000649	136.07	91.05	135.068	C8H9NO	[M+H]+	N-benzylformamide*	Alkaloids	Alkaloids	6343-54-0	2	333760	321750	264780	436220	259290	438100	356520	294310	387320	192400	170370	248460	196880	217270	246630	212780	251700	202610	215580
mws0889	135.03	75.01	136.037	C4H8O5	[M-H]-	D-Threonic Acid	Others	Saccharides and Alcohols	3909-12-4	2	53409	28032	50021	86265	57388	105110	55069	20575	48247	8157	13890	14186	68086	59334	61930	66566	67512	39162	66693
pme0033	137.05	119	136.039	C5H4N4O	[M+H]+	Hypoxanthine	Nucleotides and derivatives	Nucleotides and derivatives	68-94-0	1	110120	117750	123170	158920	83684	141290	136430	148940	131290	80846	28333	90818	115250	186220	143010	127210	163790	100280	148610
MWSmce466	135.05	92.03	136.052	C8H8O2	[M-H]-	4'-Hydroxyacetophenone	Phenolic acids	Phenolic acids	99-93-4	3	117580	106250	109500	142150	162170	172780	105970	85675	104070	73898	72160	54493	95613	150050	124560	70752	85173	94414	111100
mws1078	138.05	92.1	137.048	C7H7NO2	[M+H]+	Anthranilic Acid	Phenolic acids	Phenolic acids	118-92-3	2	15816	10783	28701	37312	40560	58072	77137	70841	65736	25851	29359	39076	62592	50193	50232	29788	21192	26491	34778
pme2268	138.05	94.07	137.048	C7H7NO2	[M+H]+	Trigonelline	Alkaloids	Alkaloids	535-83-1	1	1945700	2097400	1916800	2005100	2214600	2167900	1219100	1406300	1103200	2665700	2808700	2654700	2091800	1893000	1823500	2105400	2157500	2211900	2173500
MWSmce016	138.05	78.03	137.048	C7H7NO2	[M+H]+	Nicotinic Acid Methyl Ester(Methyl Nicotinate)	Alkaloids	Pyridine alkaloids	93-60-7	1	1700400	1539400	1965700	1419900	1399100	1225200	1416200	1655700	1500700	4687500	4254200	4619100	2327000	2197300	2169600	2127100	2247700	2374900	2721300
MWSmce584	138.09	77.04	137.084	C8H11NO	[M+H]+	Tyramine	Alkaloids	Alkaloids	51-67-2	3	33214	69469	38775	62024	37343	49086	42105	34896	31013	65804	50778	39471	51770	43062	69720	29215	49910	43771	30430
pma0948	138.09	121.1	137.084	C8H11NO	[M+H]+	Phenylethanolamine	Alkaloids	Alkaloids	7568-93-6	3	3818.4	11323	9715.8	4594	3834.1	8253.7	2290.7	7621.7	25810	5160.1	5580.4	847.15	7216.5	13534	22038	7394.6	6284.9	9881.8	4470.6
Lmbn001981	137.02	93.03	138.032	C7H6O3	[M-H]-	2,5-Dihydroxybenzaldehyde*	Phenolic acids	Phenolic acids	1194-98-5	1	1021200	1011300	986780	1790000	1571500	1669900	1074400	941010	1125300	757640	762070	707650	1566000	1675900	1448100	1259300	1209300	1155100	1238300
mws0749	137.02	93	138.032	C7H6O3	[M-H]-	4-Hydroxybenzoic acid	Phenolic acids	Phenolic acids	99-96-7	2	1437900	1427900	1406300	2359200	2284600	2447100	1646100	1231800	1478000	971650	893010	937080	2135600	2150800	1959800	1637400	1689100	1575500	1814900
Hmgn001653	137.02	93.04	138.032	C7H6O3	[M-H]-	Protocatechualdehyde*	Phenolic acids	Phenolic acids	139-85-5	2	1028700	1054800	909010	1750900	1509500	1890600	1140500	901000	1133100	698310	711930	655660	1528000	1619400	1362700	1280500	1258600	1158900	1298300
Lmgn001670	137.03	108.02	138.032	C7H6O3	[M-H]-	Salicylic acid	Phenolic acids	Phenolic acids	69-72-7	1	65784	69280	61571	122220	93284	142010	37714	30315	27263	399510	386720	499040	53623	49321	45684	79087	74755	65068	68164
mws2368	137.06	119.05	138.068	C8H10O2	[M-H]-	Tyrosol	Phenolic acids	Phenolic acids	501-94-0	2	7610.2	3793.2	6519.2	25648	12148	13634	5434	3787.8	6592	44367	39397	66042	4629.5	3263.5	13160	3792.5	11370	5416.8	11459
pme1137	140.03	94	139.027	C6H5NO3	[M+H]+	6-Hydroxynicotinic acid	Alkaloids	Alkaloids	5006-66-6	2	28214	27692	21010	27288	18115	19733	28915	23100	19751	29662	24529	21120	26488	28986	22830	27253	28768	27647	21173
pme2828	140	99	139.027	C6H5NO3	[M+H]+	4-Nitrophenol	Phenolic acids	Phenolic acids	100-02-7	3	31443000	31325000	33558000	18142000	28436000	25593000	33755000	32614000	31933000	30004000	29810000	32222000	28252000	33542000	26637000	25385000	28875000	29668000	29421000
mws0704	140.01	78.96	141.019	C2H8NO4P	[M-H]-	O-Phosphorylethanolamine	Alkaloids	Alkaloids	1071-23-4	2	26382	43054	29329	12250	8955.5	8591.8	5623.4	16033	12845	22158	25952	22646	10654	5843.1	9860.7	13941	19254	19259	16444
pma2987	142.1	124.09	141.09	C6H11N3O	[M+H]+	Histidinol	Alkaloids	Alkaloids	501-28-0	3	1962300	2175300	2000000	2654100	3087100	3390200	1988400	1932900	1979300	1044000	1130100	1009400	1309000	1540600	944390	1627600	1648700	1707200	2036300
pme3207	141.02	59	142.027	C6H6O4	[M-H]-	Muconic acid	Organic acids	Organic acids	1119-72-8	1	3878700	4301100	4592800	3714400	4503400	3902000	4244800	4291500	4192500	4638000	4058300	4530900	5101300	4353500	4388400	4099600	2859800	4620100	4692300
pme2879	141	123	142.038	C5H6N2O3	[M-H]-	5-Hydroxymethyluracil	Nucleotides and derivatives	Nucleotides and derivatives	4433-40-3	3	29268	32557	28048	29036	32606	33975	32806	16307	28293	14386	19752	22012	53370	34149	44395	54956	57141	33264	54670
Lmcp000611	144.08	84.06	143.069	C5H9N3O2	[M+H]+	2-Amino-4,5-dihydro-1H-imidazole-4-acetic acid	Alkaloids	Alkaloids	69098-41-5	3	1990100	836140	2313600	554700	417130	2137700	5243900	1903600	10549000	6937900	4283700	10964000	2058000	4083200	6482400	2774200	2837300	2803400	1259400
Rfmb320	144.1	84.08	143.095	C7H13NO2	[M+H]+	1-Methylpiperidine-2-carboxylic acid	Amino acids and derivatives	Amino acids and derivatives	7730-87-2	3	1737500	679170	2219000	431160	373800	2019800	4995000	1897200	10160000	6696900	4045500	10193000	1996600	4086100	6392700	2773300	2875000	2631700	1967200
MWSmce157	144.1	58.06	143.095	C7H13NO2	[M+H]+	Stachydrine	Alkaloids	Pyrrole alkaloids	471-87-4	2	1187700	323360	1364200	200750	200010	1774700	3419600	1100600	7026600	4062300	2499900	6471500	1258000	2596300	4558500	1534200	1725800	1656000	1854100
Hmsp000364	144.1	98.09	143.095	C7H13NO2	[M+H]+	L-Cyclopentylglycine	Amino acids and derivatives	Amino acids and derivatives	2521-84-8	3	262660	201650	327540	125070	109890	235460	468820	193770	900530	588820	394930	885700	273170	389880	612430	341480	282590	275200	199900
MWS1875	143.05	115.05	144.058	C10H8O	[M-H]-	2-Naphthol	Phenolic acids	Phenolic acids	135-19-3	2	853.85	1720.2	943.87	3454.3	1802.9	2098	1879.7	2486.5	3070.3	2140.4	1116.6	2297.2	5515.4	11569	11262	5186	4241.2	3708.4	4993.6
MWS2066	143.05	115.06	144.058	C10H8O	[M-H]-	1-Naphthol	Phenolic acids	Phenolic acids	90-15-3	2	979.05	1701.4	1713.6	3299.4	1914.1	1296.8	2652.9	2367.1	2570.6	2401.3	472.72	836.59	6115.7	12031	10622	5150.1	5803	4495.2	3770
Rfmb318	144.1	84.08	144.092	C7H14NO2+	[M]+	D-Proline betaine	Amino acids and derivatives	Amino acids and derivatives	1195-94-4	3	974200	329060	1142600	232660	197680	1003000	2619000	919760	5372400	3474400	2184000	5303800	932420	1965100	3350300	1364100	1367300	1254500	905980
mws0103	146.06	91	145.053	C9H7NO	[M+H]+	Indole-3-carboxaldehyde	Alkaloids	Plumerane	487-89-8	1	116410	94080	99325	123520	131200	136920	121880	110750	114480	70588	61490	56507	135500	175420	108860	126230	120800	117400	103800
MA10074217	144.05	115.04	145.053	C9H7NO	[M-H]-	4-Hydroxyquinoline	Alkaloids	Quinoline alkaloids	611-36-9	2	9867	8247.5	9406.2	9291.3	9733.8	10398	10789	11637	11229	18682	15759	19891	13983	23122	22002	24122	28965	28077	26590
Lmqp000427	146.08	82.07	145.074	C6H11NO3	[M+H]+	N-Methyl-Trans-4-Hydroxy-L-Proline	Amino acids and derivatives	Amino acids and derivatives	4252-82-8	3	506060	547380	532420	694510	633290	571480	603700	623070	862640	438130	435520	432990	684440	541040	623370	541210	592900	618820	569370
pme0295	146.08	86	145.074	C6H11NO3	[M+H]+	4-Acetamidobutyric acid	Organic acids	Organic acids	3025-96-5	2	240780	208030	258490	307790	116430	296520	431280	315670	487530	32297	32992	29333	305800	516550	559370	302350	289750	306270	297510
mws0567	146.09	87	145.085	C5H11N3O2	[M+H]+	4-Guanidinobutyric acid	Organic acids	Organic acids	463-00-3	1	2666200	2479000	2530400	2683500	2756100	2433200	2156700	2932000	2852000	2297800	2490000	2098800	3745900	2980100	2643600	2551800	2782000	3010600	3216500
pme2380	145.01	101	146.022	C5H6O5	[M-H]-	α-Ketoglutaric acid	Organic acids	Organic acids	328-50-7	3	16336	34538	15110	31320	45557	61138	41772	48268	33933	13810	20360	19284	23273	22078	20768	50208	32403	37566	30024
mws1012	147.04	103	146.037	C9H6O2	[M+H]+	Coumarin	Lignans and Coumarins	Coumarins	91-64-5	1	240220	204070	225880	223380	208450	212060	326190	252290	304950	244490	305310	283630	209990	316790	285490	173390	199790	222750	221600
Wmzn000227	145.06	109.04	146.058	C6H10O4	[M-H]-	2,2-Dimethylsuccinic acid	Organic acids	Organic acids	597-43-3	3	12983	13016	20220	11286	9	10036	14203	7740	19646	36576	25474	26640	10520	14803	17198	11220	14200	8301.8	17186
mws0208	145.05	101	146.058	C6H10O4	[M-H]-	Adipic Acid*	Organic acids	Organic acids	124-04-9	1	164390	162990	111340	181630	164720	229930	201840	196990	197800	95743	71840	93880	171020	224430	232790	224730	209850	220690	216700
Lmbn001609	145.05	83.05	146.058	C6H10O4	[M-H]-	2-Acetyl-2-Hydroxybutanoic Acid	Organic acids	Organic acids	-	3	8343	3099	11365	15333	17455	21722	15312	13377	13136	10445	6670.8	1827	13049	14581	13551	16118	17444	15325	13606
mws0924	145.05	101	146.058	C6H10O4	[M-H]-	2-Methylglutaric acid*	Organic acids	Organic acids	617-62-9	2	143820	138050	119730	198380	154920	236000	200340	171100	186730	106500	85022	111710	193080	215580	186180	188720	214200	186480	215980
pme0193	147.08	84	146.069	C5H10N2O3	[M+H]+	L-Glutamine	Amino acids and derivatives	Amino acids and derivatives	56-85-9	1	17980000	16017000	19451000	9155600	2460700	13512000	11208000	9180200	12457000	25979000	21403000	25813000	6655600	8141000	9674900	11655000	13177000	12176000	13471000
pme0026	147.11	84	146.106	C6H14N2O2	[M+H]+	L-Lysine	Amino acids and derivatives	Amino acids and derivatives	56-87-1	1	16834000	15541000	18466000	9264600	2264700	13039000	10663000	8700000	12362000	22090000	20347000	27496000	6614800	8028300	8670000	11726000	11914000	11424000	12801000
mws1050	148.06	88	147.053	C5H9NO4	[M+H]+	O-Acetylserine	Amino acids and derivatives	Amino acids and derivatives	5147-00-2	2	178660	96785	131460	125080	110620	173300	172180	156200	214840	107890	122250	109140	211880	162240	186250	164430	149970	160840	163650
Zmzn000113	146.05	102.06	147.053	C5H9NO4	[M-H]-	L-threo-3-Methylaspartate	Amino acids and derivatives	Amino acids and derivatives	6061-13-8	1	890810	924600	1074800	1149200	1129500	1102200	849510	746430	765620	1259400	1015400	1212200	852570	836540	959920	1112700	845240	867160	948150
pme0014	148.06	84	147.053	C5H9NO4	[M+H]+	L-Glutamic acid	Amino acids and derivatives	Amino acids and derivatives	56-86-0	1	707180	657780	694300	723640	708270	677630	471940	348900	393430	803830	785730	822880	463660	418880	490950	565190	554870	490100	544260
MWSmce608	148.1	74.02	147.09	C6H13NO3	[M+H]+	4-Hydoxy-L-Isoleucine	Amino acids and derivatives	Amino acids and derivatives	781658-23-9	3	131000	177390	133320	162020	161140	199220	147510	95896	101500	181670	164050	177250	155950	109300	108130	114590	112980	143310	144280
MWSmce190	148.09	74.02	147.09	C6H13NO3	[M+H]+	(2S,3R,4S)-4-Hydroxyisoleucine	Amino acids and derivatives	Amino acids and derivatives	55399-93-4	3	144550	146890	189980	177930	155590	191880	111180	98116	108790	178480	170330	217280	150050	133180	142900	123100	100830	140560	146120
Zmsp000366	148.1	130.09	147.09	C6H13NO3	[M+H]+	Fagomine	Alkaloids	Piperidine alkaloids	53185-12-9	3	39422	68947	41681	45068	63670	39164	33732	22385	34071	72511	78314	47240	37419	47505	54653	31306	48578	24619	36715
pmp001285	149.02	65.04	148.016	C8H4O3	[M+H]+	Phthalic anhydride	Phenolic acids	Phenolic acids	85-44-9	1	979880	851220	759810	809180	804100	705920	772430	772010	768480	727910	951470	834610	881890	917030	825130	728900	791410	791400	799750
ML10171848	147.03	85.03	148.037	C5H8O5	[M-H]-	D-Arabinono-1,4-lactone	Others	Saccharides and Alcohols	2782-09-4	1	16910	19770	18490	27186	14043	31642	12722	13179	19070	8542	3510.8	13427	11292	11930	14381	9507.6	17347	18984	16348
MWS3036	147.03	85.03	148.037	C5H8O5	[M-H]-	3-Hydroxyglutaric acid	Organic acids	Organic acids	638-18-6	3	15903	7495	8573	44404	17570	15501	14232	17429	12899	8620.8	5873.5	10903	14152	14656	8775.2	11682	19558	12278	16516
mws1024	147.05	129	148.052	C9H8O2	[M-H]-	p-Coumaraldehyde	Phenolic acids	Phenolic acids	2538-87-6	2	45306	46952	49972	52108	54740	64897	14207	11322	19196	26441	22942	26620	40119	31756	24701	30753	31076	32221	41477
mws2213	147.05	77.01	148.052	C9H8O2	[M-H]-	Cinnamic acid	Phenolic acids	Phenolic acids	140-10-3	2	7185	11274	9021.2	11603	5921.5	6207.8	6473.9	7102.8	11376	781.05	1668.1	442.6	4013.7	4667.9	5702.2	5132.5	5431.8	4682.9	7357.8
Lmgp000796	150.06	61.01	149.048	C8H7NO2	[M+H]+	4-Hydroxymandelonitrile	Alkaloids	Alkaloids	13093-65-7	1	523390	470670	418550	655050	412490	656710	421160	355090	470700	227170	205330	316080	246570	247820	324880	253910	308250	291080	344620
pme1210	150.06	61	149.051	C5H11NO2S	[M+H]+	L-Methionine	Amino acids and derivatives	Amino acids and derivatives	63-68-3	1	473060	460840	469230	601310	353200	516110	414380	300480	484030	213540	191630	314980	231670	232700	308250	237390	296080	250230	281980
MWSmce676	149.05	59.01	150.053	C5H10O5	[M-H]-	D-Arabinose	Others	Saccharides and Alcohols	28697-53-2	2	32893	40848	55376	71561	20740	40358	45640	17874	90124	29098	5869.5	15816	32582	49144	38665	50663	31109	46878	51505
MWSmce199	149.05	59.02	150.053	C5H10O5	[M-H]-	L-Xylose	Others	Saccharides and Alcohols	609-06-3	2	28502	42424	62893	62617	39994	33058	39291	28194	72920	18863	11003	10270	50044	57371	49562	41010	45183	35666	43678
MWSmce682	149.05	59.01	150.053	C5H10O5	[M-H]-	DL-Xylose	Others	Saccharides and Alcohols	25990-60-7	2	20703	35411	60092	41222	27466	38816	19809	32858	48763	29552	8740.2	18831	21414	45038	41741	51749	51236	30313	45030
mws0921	149.06	131	150.068	C9H10O2	[M-H]-	p-Coumaryl alcohol	Phenolic acids	Phenolic acids	3690-05-9	2	38371	43137	17598	34688	26778	31208	22483	9705.8	9889.8	15590	4853.2	6398.2	25483	24328	18252	18301	32925	13974	17004
pmf0420	149.06	74.9	150.068	C9H10O2	[M-H]-	Benzyl acetate	Organic acids	Organic acids	140-11-4	3	276370	246910	244550	281140	310140	343100	363210	286530	379340	221280	252790	292200	324600	410610	314960	177480	203590	208710	251490
MWSmce283	149.07	92.03	150.068	C9H10O2	[M-H]-	4'-Hydroxypropiophenone	Phenolic acids	Phenolic acids	70-70-2	3	23522	10544	8325.9	11663	10912	11650	8077	8946.7	6852	5740.8	5204.6	4823.1	9583.8	8409.5	7619.1	7411.1	6517.4	4165.7	8383.2
pme1109	152.06	135	151.049	C5H5N5O	[M+H]+	Guanine	Nucleotides and derivatives	Nucleotides and derivatives	73-40-5	1	292850	349550	630330	415220	278590	540410	760040	288360	492300	290660	250930	341970	579560	1087200	685340	623330	784190	689680	736140
pme0183	152.06	135	151.049	C5H5N5O	[M+H]+	Isoguanine	Nucleotides and derivatives	Nucleotides and derivatives	3373-53-3	1	111390	126180	248620	136540	76909	172940	205180	109630	180710	90524	112870	128190	167560	285320	229980	250780	213030	222950	245110
pme0256	151.03	151	152.033	C5H4N4O2	[M-H]-	Xanthine	Nucleotides and derivatives	Nucleotides and derivatives	69-89-6	2	119080	201900	84736	76670	44260	136540	199350	148830	100240	19872	9	28317	60141	126990	102970	154980	92060	81542	135080
MWS2984	153.05	136.03	152.045	C4H4N6O	[M+H]+	8-Azaguanine	Nucleotides and derivatives	Nucleotides and derivatives	134-58-7	3	79564	133120	102530	87062	47106	103460	140500	83651	104960	44058	19554	39633	91656	164380	110080	106630	114530	102230	124690
pme2362	151.04	107	152.047	C8H8O3	[M-H]-	Mandelic acid	Phenolic acids	Phenolic acids	90-64-2	3	55793	56169	80385	76140	62959	63345	35984	43985	41056	54994	42560	53441	55908	61273	61778	54738	45072	53540	59286
MWSmce370	151.04	107.05	152.047	C8H8O3	[M-H]-	4-Hydroxyphenylacetic acid	Phenolic acids	Phenolic acids	156-38-7	3	9890.8	4802	5913.8	8545.5	6422.2	17196	2143.2	9647	6345	3235.5	6415.5	6441	14948	3759.8	2683.8	5407	9628	12618	8590.2
mws0458	151.04	136	152.047	C8H8O3	[M-H]-	Vanillin*	Phenolic acids	Phenolic acids	121-33-5	1	7470100	7112200	6820800	7854900	7475500	7850900	3019800	3020200	3151400	6646400	6167300	6946700	7820200	6945300	7117400	6188100	6432800	5710700	6340500
MWSmce040	153.05	65.04	152.047	C8H8O3	[M+H]+	Isovanillin	Phenolic acids	Phenolic acids	621-59-0	1	1485900	1373300	1290400	1624000	1447000	1506200	618760	581470	545290	1453600	1681200	1650900	1327600	1402300	1162100	967040	1097200	1060900	1292800
Zmyn002323	151.04	107.05	152.047	C8H8O3	[M-H]-	2-Hydroxyphenylacetic acid	Organic acids	Organic acids	614-75-5	3	12358	16374	16674	23674	6260	16401	37780	12657	37790	8046.5	4360.8	11122	17272	35296	28577	15372	17916	16693	21218
MWS3149	151.04	107.05	152.047	C8H8O3	[M-H]-	3-Methoxybenzoic acid	Phenolic acids	Phenolic acids	586-38-9	3	5476	1655.1	5832.4	4921	4380.5	5835.8	21723	6701.7	4624	14424	12235	15353	12164	10978	8567.5	9551.3	8771.6	7465.3	9379.1
Zmgn004894	151.04	136.02	152.047	C8H8O3	[M-H]-	Methyl 4-hydroxybenzoate*	Organic acids	Organic acids	99-76-3	2	1603000	1290700	1333000	1550300	1436100	1529300	644200	572740	554800	1213000	1212300	1238100	1391500	1335700	1247100	1244400	1279800	1048400	1192500
MWSmce183	151.04	77.04	152.047	C8H8O3	[M-H]-	D-(-)-Mandelic acid	Organic acids	Organic acids	611-71-2	3	28437	36706	27290	36676	27649	27480	12658	15091	20866	22786	30370	29252	30928	41140	34393	27492	24324	33390	33600
mws0943	151.05	71.01	152.059	C7H8N2O2	[M-H]-	1,4-Dihydro-1-Methyl-4-oxo-3-pyridinecarboxamide	Alkaloids	Alkaloids	769-49-3	2	159770	175090	279220	119230	99918	164140	789600	433340	812310	124650	144430	397940	285090	418110	570660	223060	241130	201120	228940
mws0438	151.06	59	152.068	C5H12O5	[M-H]-	L-Arabitol	Others	Saccharides and Alcohols	7643-75-6	1	110350	130750	155370	122680	84133	141780	596010	329650	677740	128340	141100	307860	217980	336420	465550	172790	171470	170560	170420
mws0437	151.06	71	152.068	C5H12O5	[M-H]-	D-Arabitol*	Others	Saccharides and Alcohols	488-82-4	2	202410	200270	215200	115010	125030	194520	863230	487680	869000	165460	147170	460840	315920	496960	622240	233720	182070	243830	234380
mws0213	151.06	71	152.068	C5H12O5	[M-H]-	Ribitol*	Others	Saccharides and Alcohols	488-81-3	2	300160	208020	364530	156630	137360	243170	1091400	632720	1197800	248480	206830	579060	313300	601450	841440	291220	284750	302120	314920
pme0513	151.06	59	152.068	C5H12O5	[M-H]-	Xylitol	Others	Saccharides and Alcohols	87-99-0	1	125690	138040	154400	103220	66196	143980	483030	340080	528400	80099	101420	250510	194850	272210	376720	140810	159620	138840	139260
MWSslk102	155.01	119.04	154.005	C5H3ClN4	[M+H]+	6-Chloropurine	Nucleotides and derivatives	Nucleotides and derivatives	87-42-3	3	33176	34329	29030	32927	24152	36628	27728	43016	23533	38248	27050	34852	28387	29065	29707	36049	31558	32280	43845
mws0183	153.02	109.03	154.027	C7H6O4	[M-H]-	3,4-Dihydroxybenzoic acid (Protocatechuic acid)*	Phenolic acids	Phenolic acids	99-50-3	2	96957	87198	227200	117710	108940	109550	71035	60365	54209	495220	553060	593420	99127	95427	85423	154670	118780	98555	96464
Lmgn002473	153.02	109.03	154.027	C7H6O4	[M-H]-	2,6-Dihydroxybenzoic acid	Phenolic acids	Phenolic acids	303-07-1	3	94684	98536	147960	155890	128870	142530	94941	69524	73076	148760	132540	151900	158920	197690	140170	137710	124110	133680	166540
mws0180	153.02	109.03	154.027	C7H6O4	[M-H]-	2,5-Dihydroxybenzoic acid; Gentisic Acid*	Phenolic acids	Phenolic acids	490-79-9	2	47758	29594	83012	57335	55295	59255	35241	31820	28492	235890	222440	244730	48988	37783	47300	39150	40611	44354	54442
mws0639	153.02	109.03	154.027	C7H6O4	[M-H]-	2,3-Dihydroxybenzoic Acid*	Organic acids	Organic acids	303-38-8	2	107700	133000	234410	151330	126770	154420	108930	77854	62291	558860	664860	680520	134080	94152	95649	148610	147030	132510	148530
mws0254	156.08	110	155.069	C6H9N3O2	[M+H]+	L-Histidine	Amino acids and derivatives	Amino acids and derivatives	71-00-1	2	6007000	7669300	6483100	9057300	6671500	10187000	7627600	8093400	8806300	4813300	5509400	5597700	4511000	4580000	5292700	4815500	5212100	5281300	5332500
mws2124	154.98	78.8	155.982	C2H5O6P	[M-H]-	2-Phosphoglycolate	Organic acids	Organic acids	13147-57-4	3	137860	169500	96971	67295	104530	73844	107190	124150	119170	108660	94186	106320	135510	194090	163720	171300	133460	155250	155560
pme2165	155.01	111	156.017	C5H4N2O4	[M-H]-	Orotic acid	Others	Vitamin	65-86-1	3	99097	81491	78602	54976	56752	81042	86221	44256	105240	37897	50286	69052	75779	50760	57044	157860	146240	165360	136930
pmb0819	157	130	156.069	C10H8N2	[M+H]+	3-Indoleacetonitrile	Alkaloids	Plumerane	771-51-7	3	154400	192080	141910	190120	184730	251580	217160	265440	259880	144590	107440	122740	192330	225370	210650	187660	257550	242400	226110
pmf0175	157.16	157.2	158.167	C10H22O	[M-H]-	2-Decanol	Others	Saccharides and Alcohols	1120-06-5	3	3282800	3220400	3533700	3526200	3411400	3381400	4061700	3899900	3985900	3655600	3590100	3421700	4094900	4403700	4288200	3833600	3918800	3553900	3904800
pmf0174	157.16	157.2	158.167	C10H22O	[M-H]-	1-Decanol	Others	Saccharides and Alcohols	112-30-1	3	3429400	3375900	3644000	3602200	3422700	3362800	4074400	3786900	4069700	3739800	3692200	3359400	4125500	4519000	4345400	4105400	3870000	3695500	3967200
Lmbn001467	158.08	116.07	159.09	C7H13NO3	[M-H]-	5-Acetamidopentanoic Acid	Organic acids	Organic acids	1072-10-2	3	5972.5	10763	9347.3	13319	9306.1	23045	13318	12155	17864	12152	6575	5671.2	9401.1	13485	21901	17433	14822	8371	16200
Lmbn002072	159.07	97.07	160.074	C7H12O4	[M-H]-	2-Propylsuccinic acid*	Organic acids	Organic acids	618-57-5	3	35555	43813	41602	57030	32630	32794	41213	57805	49224	27004	26610	17766	70239	61536	66763	50859	34416	43825	41266
Zmjn001813	159.07	97.06	160.074	C7H12O4	[M-H]-	Pimelic acid*	Organic acids	Organic acids	111-16-0	3	41825	62740	38368	40161	51069	45924	57804	72834	54076	42680	42926	32489	42692	64044	50977	49526	40978	59191	77505
pme0128	159.08	88	160.085	C6H12N2O3	[M-H]-	L-Alanyl-L-Alanine	Amino acids and derivatives	Amino acids and derivatives	1948-31-8	2	15098	8650.5	8757	10684	8742.8	19961	21748	14632	22163	1744	1165	9313.5	4715	5221	15277	11155	9398	5256	5838.2
mws0005	161.11	144	160.1	C10H12N2	[M+H]+	Tryptamine	Alkaloids	Plumerane	61-54-1	2	187870	345450	430710	126320	252420	473970	306220	243200	368110	63300	49322	31462	184290	209850	325410	133390	131420	181100	146770
mws0102	160.04	116	161.048	C9H7NO2	[M-H]-	Indole-5-carboxylic acid	Alkaloids	Plumerane	1670-81-1	1	95023	89832	80219	138720	101030	170430	201650	240740	244610	38800	36247	43850	196310	262270	187160	157410	151780	169450	158200
mws1417	160.04	116	161.048	C9H7NO2	[M-H]-	Indole-3-carboxylic acid	Alkaloids	Plumerane	771-50-6	1	320020	268360	266930	454510	367530	460040	651070	688860	805330	143080	134290	151900	540360	859080	552250	478350	512740	502210	539100
NK10246260	162.06	116.05	161.048	C9H7NO2	[M+H]+	2,4-Dihydroxyquinoline	Alkaloids	Quinoline alkaloids	86-95-3	3	26008	21010	17839	19374	23296	29762	5323.5	27176	22244	18637	13300	2385.2	14572	12935	19938	24133	20212	12400	21942
mws1550	162.06	73.1	161.051	C6H11NO2S	[M+H]+	S-Allyl-L-cysteine	Amino acids and derivatives	Amino acids and derivatives	21593-77-1	2	7953.2	6231.8	5788.5	6362.2	5168.4	9660.4	13337	6034.8	8928.4	7339.9	7679.4	3192.4	14077	9159.4	20354	10592	18962	14343	13494
pme3382	160.06	98	161.069	C6H11NO4	[M-H]-	N-Acetyl-L-threonine	Amino acids and derivatives	Amino acids and derivatives	17093-74-2	2	68429	69354	47335	35748	31200	50658	57080	47749	49226	39132	24068	37385	54315	42581	47178	57874	51731	49160	53297
mws1346	162.08	98	161.069	C6H11NO4	[M+H]+	DL-2-Aminoadipic acid	Alkaloids	Alkaloids	542-32-5	2	593360	562270	785800	715430	635320	1089700	853950	656750	745260	597200	510910	702220	837850	850770	857460	835270	881080	818650	809360
Lmcp000282	162.11	85.03	161.105	C7H15NO3	[M+H]+	L-Carnitine	Alkaloids	Alkaloids	541-15-1	1	349000	445640	333500	240010	174650	276900	636140	512440	688970	341200	271080	411990	286040	453550	492710	299110	307040	348370	327270
MWS0559	161.05	71.01	162.053	C6H10O5	[M-H]-	1,6-anhydro-β-D-glucose	Others	Saccharides and Alcohols	498-07-7	2	27144	48708	40532	102080	32446	58905	45524	21652	81310	21305	10674	20412	40429	41276	45790	44223	34657	50289	49944
pme2914	161.05	99	162.053	C6H10O5	[M-H]-	3-Hydroxy-3-methylpentane-1,5-dioic acid	Organic acids	Organic acids	503-49-1	2	224040	227060	247420	721610	190910	383610	398690	245990	353980	69822	55132	59648	174390	270700	165520	227460	201660	177450	225640
pmf0440	163.08	91.1	162.068	C10H10O2	[M+H]+	4-MethoxycinnaMaldehyde	Phenolic acids	Phenolic acids	1963-36-6	2	91352	96664	70081	80267	83668	80030	80058	76510	76006	71095	69417	90628	67118	86937	74598	44803	45055	48087	54217
pme1439	165.05	119	164.047	C9H8O3	[M+H]+	p-Coumaric acid	Phenolic acids	Phenolic acids	501-98-4	1	638310	610720	615530	983940	938070	996710	495310	394160	496960	560840	556760	593030	952980	958120	785060	627360	666960	641700	798500
MWSCX017	165.05	119.05	164.047	C9H8O3	[M+H]+	4-hydroxyphenyl acrylaldehyde	Others	Others	-	1	682130	655050	656850	997180	1026700	997550	460720	391990	476530	543810	596990	617380	952480	931820	876850	562020	619200	687380	877990
MWSCX015	165.05	91.05	164.047	C9H8O3	[M+H]+	(E)-3-(3,4-dihydroxyphenyl)acrylaldehyde	Phenolic acids	Phenolic acids	-	1	1015200	1055900	914610	1560200	1417000	1534900	646040	710680	726150	826360	942120	846850	1393600	1428800	1245500	937350	1018300	1053800	1153700
Lmbn002648	163.04	119.05	164.047	C9H8O3	[M-H]-	α-Hydroxycinnamic Acid*	Phenolic acids	Phenolic acids	5801-57-0	3	157110	97584	147790	189650	143200	149220	137510	102090	123320	273100	234930	248730	157670	120450	132390	203600	100810	103480	112550
mws0159	163.04	91	164.047	C9H8O3	[M-H]-	Phenylpyruvic acid	Organic acids	Organic acids	156-06-9	2	101610	106810	102760	193220	168870	164100	67348	76047	62668	92807	88068	81777	124840	115550	144100	118100	112640	115330	126460
Lmmn001643	163.04	119.05	164.047	C9H8O3	[M-H]-	2-Hydroxycinnamic acid*	Organic acids	Organic acids	583-17-5	1	231170	282170	232110	359770	305420	276590	208840	113260	239900	552080	546720	515090	344670	296980	295200	304660	324910	214170	318210
pme3083	164.04	120	165.043	C8H7NO3	[M-H]-	2-(Formylamino)benzoic acid	Phenolic acids	Phenolic acids	3342-77-6	3	998440	1153400	1132800	1971900	1806500	1696000	545400	586400	896960	859050	1050900	920900	1363100	1684500	1474100	1382600	1310800	1252600	1445300
pme2617	166.05	102	165.046	C5H11NO3S	[M+H]+	L-Methionine Sulfoxide	Amino acids and derivatives	Amino acids and derivatives	3226-65-1	2	998780	1079300	938270	1301100	1340800	1423800	625400	813450	909830	453390	398460	546650	655190	655960	730410	668940	696250	876660	775180
MWS4525	166.07	124.05	165.065	C6H7N5O	[M+H]+	6-O-methylguanine	Nucleotides and derivatives	Nucleotides and derivatives	20535-83-5	2	23317	26187	35238	28109	13799	33271	18086	26782	33718	9978.3	10216	11469	25459	36996	18959	22594	29648	24027	22900
pme0021	166.09	120.08	165.07	C9H11NO2	[M+H]+	L-Phenylalanine	Amino acids and derivatives	Amino acids and derivatives	63-91-2	1	33691000	37237000	33423000	46929000	24421000	45509000	40841000	31185000	42490000	16898000	16132000	23869000	19912000	24900000	31555000	21784000	22070000	24186000	23737000
MWSmce583	165.02	91.02	166.027	C8H6O4	[M-H]-	Piperonylic acid	Organic acids	Organic acids	94-53-1	3	459140	401000	410600	503610	505080	512430	533050	486950	542860	420880	416100	519950	497070	657240	537550	311090	352230	361580	408230
pme0281	165.02	121.03	166.027	C8H6O4	[M-H]-	Terephthalic acid	Phenolic acids	Phenolic acids	100-21-0	2	483630	437620	618080	569930	646930	500850	538040	478630	551320	561810	461990	501170	622780	570530	515070	656310	682350	552270	682190
pmc0274	167.1	121.1	166.031	C6H6N4S	[M+H]+	6-Methylmercaptopurine	Nucleotides and derivatives	Nucleotides and derivatives	50-66-8	3	1797100	2042700	1877100	2823800	1258000	2681200	2117300	1667000	2432800	848380	842440	1210600	1019200	1318900	1778900	1125800	1072800	1186200	1245600
mws0344	165.04	75	166.048	C5H10O6	[M-H]-	D-Xylonic acid	Organic acids	Organic acids	526-91-0	1	569710	489820	344140	1152100	996390	1530700	1591400	899970	1505500	120280	146940	202730	1095200	1525800	1263400	599590	698790	839500	636170
MWS1839	165.06	92.03	166.063	C9H10O3	[M-H]-	Ethylparaben	Phenolic acids	Phenolic acids	120-47-8	3	160270	29532	33938	23266	24453	30120	32264	26920	29417	23606	25869	25478	20057	26655	27639	2504	2514.5	1198.1	3410.8
MWS0274	165.06	119.05	166.063	C9H10O3	[M-H]-	DL-3-Phenyllactic acid	Organic acids	Organic acids	828-01-3	2	46340	32505	35721	63419	55549	47141	22218	19490	28687	24939	32014	38424	51552	40364	28110	41663	44044	43668	43277
Lmbn005172	165.06	119.05	166.063	C9H10O3	[M-H]-	2,6-Dimethoxybenzaldehyde	Phenolic acids	Phenolic acids	3392-97-0	2	33451	33512	25919	61087	53390	51329	36658	20714	34892	21200	28516	39364	52584	47232	55220	34093	38667	42409	50272
Lmrn003000	165.06	103.06	166.063	C9H10O3	[M-H]-	2-Hydroxy-3-phenylpropanoic acid	Organic acids	Organic acids	7326-19-4	2	18020	30775	26834	13750	9129.8	9122.5	7141	6510.5	5815.8	645.25	3934.5	1290.8	8986	13004	7820.5	5123	7048.8	8498	3258.5
mws0467	165.06	119.05	166.063	C9H10O3	[M-H]-	3-(4-Hydroxyphenyl)-propionic acid	Phenolic acids	Phenolic acids	501-97-3	1	43721	58162	53884	77100	66613	63995	48699	51274	42227	45552	44900	46066	79378	77258	66898	52160	43670	48902	53285
MWSmce165	165.08	59.02	166.084	C6H14O5	[M-H]-	L-Fucitol	Others	Saccharides and Alcohols	13074-06-1	2	107810	61115	92546	230570	136510	137920	278810	103540	327820	28281	21046	37681	190140	311760	198920	182940	143060	120540	163500
mws0851	143.11	143.11	166.097	C8H15NaO2	[M-Na]-	Sodium Valproate	Others	Others	1069-66-5	2	832840	817270	850500	920060	812030	913980	1257000	1026400	1294900	568090	714500	564440	1032100	1213400	1130200	809100	821290	822900	771400
pmn001681	165.09	149.06	166.099	C10H14O2	[M-H]-	1-(4-Methoxyphenyl)-1-propanol	Phenolic acids	Phenolic acids	5349-60-0	2	92240	88066	91447	148920	124060	109900	117090	87577	81113	113550	119550	147370	118770	106000	107790	63665	54649	57747	72840
Zmjp000624	168.06	150.05	167.058	C8H9NO3	[M+H]+	Pyridoxal	Others	Vitamin	66-72-8	3	34588	26776	30372	30866	27520	29897	21867	24849	25525	35920	38186	32402	30657	31516	29927	25269	27756	33169	31909
NK10253223	168.06	94.06	167.058	C8H9NO3	[M+H]+	2-Amino-3-methoxybenzoic acid	Phenolic acids	Phenolic acids	3177-80-8	3	31270	28274	20764	24357	31245	30651	27593	23925	24768	41683	36697	31953	28766	40299	32796	24387	23479	33009	32015
Hmtp000776	168.07	105.03	167.059	C8H9NO3	[M+H]+	4,5,6-Trihydroxy-2-cyclohexen-1-ylideneacetonitrile	Alkaloids	Alkaloids	-	3	38551	46679	37444	56023	28205	64131	49198	32152	49157	19487	21286	26913	19850	26329	37611	24809	25684	24860	26728
mws2125	166.98	78.7	167.982	C3H5O6P	[M-H]-	Phosphoenolpyruvate	Organic acids	Organic acids	138-08-9	2	8696.5	9551.8	9314.5	4073.5	2484.8	6788.8	4918.2	5507.8	10506	5123.5	7673.2	3932	4528.5	5361.2	2134.8	10898	12728	10826	3974.5
Cmdn000784	167.02	124.01	168.028	C5H4N4O3	[M-H]-	Uric acid	Nucleotides and derivatives	Nucleotides and derivatives	69-93-2	1	1017.2	5923.2	1117	1012.5	1576.5	20644	1985.5	976.5	2068.5	9	9	9	1509.5	3207.5	4785.8	28654	20011	28570	46156
Hmbp001276	169.05	65.03	168.042	C8H8O4	[M+H]+	Gallacetophenone	Phenolic acids	Phenolic acids	528-21-2	2	98033	96218	64832	110350	90748	99319	20041	29513	22828	11599	12325	14388	40629	35656	49643	54886	32062	57679	73479
mws0028	167.03	108.02	168.042	C8H8O4	[M-H]-	Vanillic acid	Phenolic acids	Phenolic acids	121-34-6	1	584230	621670	548000	993080	997270	940500	454380	424890	493400	463380	431100	533790	868140	931120	742430	592260	644530	617410	624400
MWSmce501	167.04	108.02	168.042	C8H8O4	[M-H]-	Protocatechuic Acid Methyl Ester	Phenolic acids	Phenolic acids	2150-43-8	3	9	9	9	9	9	9	9	9	9	694020	669770	727760	9	9	9	75766	87509	102690	99422
MWSslk066	169.05	65.04	168.042	C8H8O4	[M+H]+	3-Hydroxy-4-methoxybenzoic acid	Phenolic acids	Phenolic acids	645-08-9	1	181030	179050	194830	270610	278180	317740	167170	107970	159730	167040	162380	160380	283820	230800	244430	138350	146880	136370	202510
pme3081	169.1	134	168.09	C8H12N2O2	[M+H]+	4-(Aminomethyl)-5-(hydroxymethyl)-2-methylpyridin-3-ol	Others	Others	85-87-0	2	96078	79669	139230	82246	85500	97165	108140	60573	89171	114190	91093	90660	129880	105770	132430	97557	125990	89428	126860
MWStz091	169.1	70.07	168.09	C8H12N2O2	[M+H]+	Cyclo(L-Ala-L-Pro)	Amino acids and derivatives	Amino acids and derivatives	36357-32-1	2	12896	19293	14458	24948	21288	16239	18620	9609.9	15745	3302	2706.5	6285.9	11380	14912	17395	8963.7	11230	13235	11220
Zmpp000906	170.08	134	169.074	C8H11NO3	[M+H]+	Norepinephrine	Others	Others	51-41-2	1	298890	288460	262520	316930	300210	325420	350760	310000	395110	445060	386050	367320	330060	364970	298320	283290	297650	278950	286910
pme1383	170.08	134.1	169.074	C8H11NO3	[M+H]+	Pyridoxine	Others	Vitamin	65-23-6	1	377750	311050	315640	405620	369820	398540	407310	361250	482320	497130	431520	434550	378550	472630	348750	321770	334280	313910	321410
pme0181	170.09	124	169.085	C7H11N3O2	[M+H]+	3-Methyl-L-Histidine	Amino acids and derivatives	Amino acids and derivatives	368-16-1	2	30439	11216	17175	29619	23176	41513	39130	23179	40009	15852	26695	28627	30479	11862	29672	31109	35062	46592	30913
MWS0933	170.09	124.09	169.085	C7H11N3O2	[M+H]+	1-Methylhistidine	Amino acids and derivatives	Amino acids and derivatives	332-80-9	2	28265	28322	36767	16500	21378	13327	26151	16685	9496.3	15265	14278	19894	23975	25420	17619	19551	22617	27285	21947
MWStz063	170.15	152.14	169.147	C10H19NO	[M+H]+	2-Ethyl-2,6,6-trimethylpiperidin-4-one	Alkaloids	Piperidine alkaloids	133568-79-3	2	46764	41699	50182	46734	36637	33300	21784	21774	20520	54942	58768	34726	54179	39213	44195	34443	36787	39948	38365
pme3186	169	79	169.998	C3H7O6P	[M-H]-	DL-Glyceraldehyde-3-phosphate	Organic acids	Organic acids	591-59-3	3	29244	33225	19544	32023	28177	31150	66864	66444	63209	34911	24657	43608	47012	45903	88849	49140	45132	32796	42250
MWS1812	171.17	55.05	170.167	C11H22O	[M+H]+	2-Undecanone	Others	Others	112-12-9	3	74702	72415	60006	215940	205660	185600	305140	400220	375950	72649	54622	76328	209850	247580	240550	140110	113750	104240	150430
Lmbn003524	171.1	99.08	172.11	C9H16O3	[M-H]-	9-Oxononanoic acid	Organic acids	Organic acids	2553-17-5	2	47641	41285	48550	82290	69686	72591	92666	81389	93384	23095	26773	34169	84477	102470	90842	62349	60926	58467	63675
MWS5169	172.04	128.05	173.048	C10H7NO2	[M-H]-	Quinoline-4-carboxylic acid	Alkaloids	Quinoline alkaloids	486-74-8	3	5608.5	4853.1	4583.8	4184.4	7399.7	5011.2	10123	6492.5	7218.9	3430.8	3940	701.19	7379.4	9001.8	6559.6	5442.1	5041.3	4311.9	5132.9
pme0253	174.11	86	173.105	C8H15NO3	[M+H]+	N-Acetyl-L-leucine	Amino acids and derivatives	Amino acids and derivatives	1188-21-2	2	217430	244580	246080	50030	22342	39718	72754	37360	67148	12331	9939.3	8950.8	21997	48223	27274	56549	49370	48101	42958
pme3009	175.02	99	174.016	C6H6O6	[M+H]+	Trans-Citridic acid	Organic acids	Organic acids	4023-65-8	2	833210	837200	1019900	820060	796360	902460	563900	757810	849530	826210	719030	798680	966220	725200	946290	954200	843600	917080	806920
pme2550	173.02	137	174.016	C6H6O6	[M-H]-	Cis-Aconitic acid	Organic acids	Organic acids	585-84-2	3	9741.2	17124	22298	8674.5	8061	10574	8662.5	3166.5	5110.8	11485	18761	17271	16650	13178	18452	8581.8	10330	9152	13434
Lmgn002555	173.08	59.01	174.089	C8H14O4	[M-H]-	2-Propylglutaric acid	Organic acids	Organic acids	32806-62-5	2	23288	21168	27342	32385	9333.8	18358	40382	50496	57493	58513	41414	49653	46372	60291	45972	63424	86354	78036	78296
mws0242	173.08	111	174.089	C8H14O4	[M-H]-	Suberic Acid	Organic acids	Organic acids	505-48-6	1	58202	77083	70078	146350	112750	133910	150670	117640	152310	35721	27587	34663	155110	173730	177300	97226	97610	82101	106020
Zmyn000155	173.11	131.08	174.1	C7H14N2O3	[M-H]-	N-α-Acetyl-L-ornithine	Amino acids and derivatives	Amino acids and derivatives	6205-08-9	2	427080	490050	450410	442630	275550	490980	623360	595070	688380	381510	367570	391640	320660	367740	429430	349080	373630	333500	368780
mws1401	175.11	84	174.1	C7H14N2O3	[M+H]+	L-Theanine	Amino acids and derivatives	Amino acids and derivatives	3081-61-6	2	75644	85164	118240	18375	9667.9	21323	17344	11074	17778	11355	15595	11890	58939	9967.7	10672	22906	33665	28747	23498
MWSmce119	175.11	70.06	174.112	C6H14N4O2	[M+H]+	L-Arginine	Amino acids and derivatives	Amino acids and derivatives	74-79-3	1	10436000	12605000	10367000	11670000	7111000	13151000	15010000	12096000	17527000	9182700	8991700	10147000	8189700	8659100	10963000	7771100	8466400	8721300	9090900
mws1105	175.12	130	174.116	C11H14N2	[M+H]+	Gramine	Alkaloids	Alkaloids	87-52-5	2	87793	125130	101150	129940	118940	160610	127800	134780	143440	84761	70933	81226	98954	114470	136790	121030	105630	128870	116050
pme2559	174.04	88	175.048	C6H9NO5	[M-H]-	N-Acetyl-L-Aspartic Acid	Amino acids and derivatives	Amino acids and derivatives	997-55-7	2	41341	24966	16979	9204.5	4131.3	19857	40225	20765	22263	5912.5	6064	3275.2	3556.6	21002	16126	15160	6458.8	9950.5	11987
pme1651	176.1	130.1	175.063	C10H9NO2	[M+H]+	Indole 3-acetic acid (IAA)	Alkaloids	Plumerane	87-51-4	3	57680	70036	57860	68883	65819	94033	95120	82986	91898	400190	387320	455670	227020	277890	256320	184040	156600	153110	262260
pme0008	176.1	113	175.096	C6H13N3O3	[M+H]+	L-Citrulline	Amino acids and derivatives	Amino acids and derivatives	372-75-8	2	149620	197970	203880	121050	109220	163320	217660	195640	339330	149870	154200	205900	142020	162900	145670	130750	145660	166680	207680
pme2024	177.1	160	176.095	C10H12N2O	[M+H]+	Serotonin*	Alkaloids	Plumerane	50-67-9	2	750900	849910	723040	808120	657670	1082000	1641200	1604400	1341100	53664	45264	60987	405180	482360	464750	443990	465480	478280	334340
pmb0774	177.1	160.3	176.095	C10H12N2O	[M+H]+	N-Hydroxytryptamine*	Alkaloids	Phenolamine	-	2	682600	695180	559250	616020	664660	1051600	1389200	1353000	1186100	59618	44237	31696	350450	431520	383540	379860	421470	406870	308850
mws1013	177.02	133.2	178.027	C9H6O4	[M-H]-	Esculetin	Lignans and Coumarins	Coumarins	305-01-1	1	329600	402320	344600	560170	499000	540770	350880	400330	341090	196070	172560	161730	305760	243250	216380	255970	187290	234290	289960
pmb2795	177	145	178.063	C10H10O3	[M-H]-	4-Methoxycinnamic acid*	Phenolic acids	Phenolic acids	830-09-1	3	378340	438380	495090	358380	373790	336840	427130	371400	406410	175190	173310	187330	227930	372250	304040	223180	248380	234950	261360
Jmzn006005	177.06	117.04	178.063	C10H10O3	[M-H]-	3,4-methylenedioxy cinnamyl alcohol	Lignans and Coumarins	Lignans	58095-76-4	1	868420	1173300	1168700	910920	906050	843670	1040100	899180	1010400	456000	427460	469380	555380	966530	779030	612370	623390	583520	633090
mws0009	179.07	91	178.063	C10H10O3	[M+H]+	Coniferaldehyde	Phenolic acids	Phenolic acids	20649-42-7	1	118180	115930	107480	159570	145160	152350	59150	52056	61243	108590	130050	122970	134940	118900	133270	110520	101100	113710	126100
mws1195	179.07	147.1	178.063	C10H10O3	[M+H]+	p-Coumaric acid methyl ester*	Phenolic acids	Phenolic acids	3943-97-3	2	252840	284860	315810	250370	267580	248770	279910	248580	258250	116920	129820	143130	153770	243890	204550	121050	145840	168110	168520
mws1200	177	145	178.063	C10H10O3	[M-H]-	Trans-4-Hydroxycinnamic Acid Methyl Ester	Phenolic acids	Phenolic acids	19367-38-5	1	537380	670000	697000	519150	572440	516290	630200	535190	648120	284980	260260	285540	319830	584990	472630	366190	357050	352220	393920
pmb0786	180.09	163.06	179.079	C6H13NO5	[M+H]+	D-Glucosamine	Others	Saccharides and Alcohols	3416-24-8	3	3207100	2289500	2299900	2157800	1799400	1957700	2208700	2150500	2431100	3393200	1695500	1636400	1679800	1075500	1754400	4229300	3607800	2331900	1540400
mws2212	179.03	135.05	180.042	C9H8O4	[M-H]-	Caffeic acid	Phenolic acids	Phenolic acids	331-39-5	1	452970	530420	461710	688890	738610	729880	460240	488940	493260	363730	405130	473520	374990	335060	325770	319880	262610	288780	314290
mws0731	179.05	78.03	180.054	C8H8N2O3	[M-H]-	Nicotinuric acid	Amino acids and derivatives	Amino acids and derivatives	583-08-4	2	9	9	9	6276	9	56962	9	9	9	9	9	9	9	9	9	27702	23967	27748	28169
pme0516	179.06	87	180.063	C6H12O6	[M-H]-	Inositol	Others	Saccharides and Alcohols	87-89-8	1	245650	278830	278310	283860	249460	229190	282110	290730	279330	268840	210840	216110	238700	225730	228460	196140	218750	236280	213880
MWSmce576	179.06	59.01	180.063	C6H12O6	[M-H]-	L-Glucose	Others	Saccharides and Alcohols	921-60-8	1	1170400	2257700	2271300	4438300	1632400	3222100	1846300	1402300	3386900	730850	620160	839000	2252600	2108400	1883200	2132800	1693000	1813600	1932700
pmf0139	179.06	59	180.063	C6H12O6	[M-H]-	D-Galactose*	Others	Saccharides and Alcohols	59-23-4	3	690940	1448700	1545500	2405200	1132100	1789300	919570	927560	2116500	451000	375850	489840	1273900	1307200	1241400	1063300	1065500	1159900	1249500
pmf0138	179.06	59	180.063	C6H12O6	[M-H]-	D-Mannose*	Others	Saccharides and Alcohols	3458-28-4	3	786660	1600700	1795200	3273400	1178500	2106400	1224700	1106900	2494600	606820	395800	545960	1472200	1427400	1488800	1286200	1352200	1384900	1473700
mws1164	179.06	59.01	180.063	C6H12O6	[M-H]-	D-Fructose*	Others	Saccharides and Alcohols	7660-25-5	1	1105200	2420200	2177800	4234200	1376300	2566400	1703000	1120400	3350900	700320	639790	729160	1685600	1866300	1712100	1591900	1675400	1493700	1762300
mws4170	179.06	59.01	180.063	C6H12O6	[M-H]-	D-Glucose*	Others	Saccharides and Alcohols	14431-43-7	1	1313400	2466400	2342000	4904200	1598300	2931600	1802900	1396200	3664600	804760	717260	820190	1876700	1896700	2054500	1730200	1924600	1618100	1797000
mws0093	179.07	146	180.079	C10H12O3	[M-H]-	Coniferyl alcohol	Phenolic acids	Phenolic acids	458-35-5	2	61297	65558	33750	99472	36312	59164	30629	26078	39213	54658	48343	58896	64763	49936	41435	57194	61265	35389	34745
Lmbn004847	179.07	146.04	180.079	C10H12O3	[M-H]-	4-Methoxyphenylpropionic acid	Phenolic acids	Phenolic acids	-	3	12236	20361	14005	24230	17211	10168	12718	9506.5	13352	18656	17174	10198	17843	17832	10818	18620	20346	16618	16568
Cmyp007180	181.12	107.09	180.115	C11H16O2	[M+H]+	Dihydroactinidiolide	Others	Others	17092-92-1	2	108120	111430	137340	143070	134770	155750	110510	101320	104700	110110	119490	109300	179950	203560	174250	135140	136130	175950	164700
Hmcp009963	180.14	123.07	180.138	C11H18NO+	[M]+	Candicine	Alkaloids	Alkaloids	6656-13-9	3	5997.3	6373.4	7745.1	8130.5	3669.1	4792.7	8192.9	6849.7	7875.4	9868.5	5484.7	5228	6809	5647	9342.6	4585.2	5775.7	6754.4	6565
MWStz070	182.08	91.05	181.074	C9H11NO3	[M+H]+	N-(2-Hydroxy-4-methoxyphenyl)acetamide	Alkaloids	Phenolamine	58469-06-0	3	5124100	5210600	4719000	6857900	3846000	6738700	5458100	4129300	6025000	2892600	2584000	3611800	2827700	3253400	3672500	2880700	3265600	2947600	3298700
mws0250	182.08	136.1	181.074	C9H11NO3	[M+H]+	L-Tyrosine	Amino acids and derivatives	Amino acids and derivatives	60-18-4	1	6713700	6309500	6456700	8751100	5334200	8419700	6419900	5077800	8116400	3733900	3343600	4235700	3669700	4364300	4981200	3728100	4705700	3884900	4471200
Zmsp000878	182.08	136.08	181.074	C9H11NO3	[M+H]+	4-Hydroxy-5-(2-oxo-1-pyrrolidinyl)benzoic acid	Alkaloids	Pyrrole alkaloids	-	3	1810900	1840500	1558000	2479600	1230600	2409200	1745200	1372700	2013700	997900	919400	1166600	936410	1208500	1379300	971360	1075600	992350	1149300
Lmjp004702	183.07	137.06	182.058	C9H10O4	[M+H]+	2',4'-Dihydroxy-6'-methoxyacetophenone	Phenolic acids	Phenolic acids	3602-54-8	3	93838	76440	113120	92403	124630	101430	140920	129520	127050	41708	47184	48109	96326	95629	86511	76602	74063	75183	79155
mws0117	181.05	122	182.058	C9H10O4	[M-H]-	Homovanillic acid; 4-Hydroxy-3-methoxyphenylacetic acid	Phenolic acids	Phenolic acids	306-08-1	2	20889	25749	17623	18288	10582	20330	6659	11502	9924.8	19850	17628	12586	28248	40460	24889	12739	12538	14862	23587
MWSmce455	181.05	107.01	182.058	C9H10O4	[M-H]-	Vanillic acid methyl ester	Phenolic acids	Phenolic acids	3943-74-6	3	8306.5	12961	10748	12464	10412	9172	9109.7	6520.2	9288.8	13548	14286	14158	11455	12886	9564.1	10702	10447	9405.5	13936
MWSmce587	183.06	165.06	182.058	C9H10O4	[M+H]+	2,6-Dimethoxybenzoic acid	Phenolic acids	Phenolic acids	1466-76-8	3	27598	5173	20702	22550	24696	15910	10353	11804	25164	22960	13203	12505	27277	35410	38334	40422	23621	17722	30953
MWSHY0042	183.07	140.05	182.058	C9H10O4	[M+H]+	Syringaldehyde	Phenolic acids	Phenolic acids	134-96-3	3	73431	68634	100350	104490	81138	99502	62249	44269	57666	37282	58523	61306	109820	70776	73716	54992	72895	66410	80816
mws1155	181.07	101.02	182.079	C6H14O6	[M-H]-	D-Mannitol*	Others	Saccharides and Alcohols	69-65-8	1	215270	202880	226790	279450	201140	197710	316160	306800	359570	266050	203030	271180	159310	213700	242280	154560	172650	180930	227240
mws0214	181.07	71	182.079	C6H14O6	[M-H]-	D-Sorbitol	Others	Saccharides and Alcohols	50-70-4	1	870840	991930	923140	1015500	775620	814910	1383700	1166800	1402000	958010	749630	1189500	664470	840870	930460	672010	677230	640290	726850
pme2237	181.07	101	182.079	C6H14O6	[M-H]-	Dulcitol*	Others	Saccharides and Alcohols	608-66-2	1	822160	868180	798720	965400	801410	705160	1192800	1027800	1250100	976250	637890	1081400	606050	711150	856180	624220	671720	646000	689010
pme2596	184.06	148	183.053	C8H9NO4	[M+H]+	4-Pyridoxic acid	Others	Vitamin	82-82-6	1	714040	680870	572250	458260	486320	518420	440960	414390	436400	431710	349960	342430	356130	448590	348140	351750	436460	368720	423870
pmb1754	184	125	184.073	C5H15NO4P+	[M]+	O-Phosphocholine	Alkaloids	Alkaloids	107-73-3	3	900320	899950	1045600	995870	1025200	1256800	1142600	1068700	1107200	388810	563740	440110	823060	709380	680220	642160	602840	631590	736600
MWS1816	183.14	183.14	184.146	C11H20O2	[M-H]-	10-Undecenoic acid	Lipids	Free fatty acids	112-38-9	3	18518	13181	15195	14255	11097	11258	14317	13260	18123	13708	17663	16057	20186	10191	14889	13358	13608	11815	14491
Zmgn000447	184.98	78.96	185.993	C3H7O7P	[M-H]-	3-Phospho-D-glyceric acid	Others	Saccharides and Alcohols	820-11-1	2	1691900	1832700	2210800	1472700	1450600	1398500	2235600	2053700	2052800	2200700	2238300	2247600	1620200	2024200	2126300	2143800	1982500	1932100	1834100
mws0752	185.15	185.16	186.162	C11H22O2	[M-H]-	Undecylic Acid	Lipids	Free fatty acids	112-37-8	2	370970	301820	363370	459470	406600	417390	475240	440720	413030	316210	345460	349200	415590	533530	522330	404030	485140	363930	410750
Hmmp001310	188.07	118.07	187.063	C11H9NO2	[M+H]+	3-Indoleacrylic acid	Alkaloids	Alkaloids	1204-06-4	1	1129400	1292800	990660	1627900	1431100	2200300	2191500	2157000	2199300	1065500	1047900	1232000	2368700	2248400	2032200	1789000	1720100	1794300	1840700
Hmgp002327	188.07	118.06	187.063	C11H9O2N	[M+H]+	3-amino-2-naphthoic acid	Alkaloids	Alkaloids	-	1	1626700	2030800	1575000	2349600	2108600	3238000	3233400	3294000	3334700	1707300	1528300	1755500	3251300	3301000	3098300	2825600	2579700	2593000	2712600
pmn001492	187.1	123.1	188.041	C11H8O3	[M-H]-	Ayapin	Lignans and Coumarins	Coumarins	494-56-4	2	176830	199100	192700	338820	282100	286300	381810	346570	405670	106910	106900	119240	294380	419650	429510	227840	219490	257260	201160
pme0137	187.07	125	188.08	C7H12N2O4	[M-H]-	N-Acetyl-L-Glutamine	Amino acids and derivatives	Amino acids and derivatives	2490-97-3	2	47503	38263	34552	17024	6012.5	35876	122940	45239	47398	23608	30918	22572	55264	42162	52456	39328	22663	33258	34770
mws0237	187.1	125	188.105	C9H16O4	[M-H]-	Azelaic acid	Organic acids	Organic acids	123-99-9	1	2658000	2970300	2939000	5500600	4914600	4600500	6624300	5702300	6819500	1946400	1835400	1749400	5331300	7335500	7171200	3754500	3774100	3861200	3772000
pme0122	189.12	126	188.116	C8H16N2O3	[M+H]+	N6-Acetyl-L-lysine	Amino acids and derivatives	Amino acids and derivatives	692-04-6	2	226820	179370	107340	82825	66156	70970	254080	199330	230460	263000	230890	323570	147520	190590	109550	146170	159470	131730	161360
mws5041	189.12	86.1	188.116	C8H16N2O3	[M+H]+	L-Glycyl-L-isoleucine*	Amino acids and derivatives	Amino acids and derivatives	19461-38-2	2	140880	95053	112330	301190	77746	266620	356690	120370	513730	22057	20083	54438	53915	108340	129750	87366	99138	92838	81786
mws0736	189.12	86	188.116	C8H16N2O3	[M+H]+	N-Glycyl-L-leucine*	Amino acids and derivatives	Amino acids and derivatives	869-19-2	2	174060	110800	133090	327630	80321	314090	386450	144180	549930	14323	29244	74297	64132	118500	126830	93990	97916	100650	106910
pme3388	189.13	144	188.127	C7H16N4O2	[M+H]+	Homoarginine	Amino acids and derivatives	Amino acids and derivatives	156-86-5	2	50287	52794	61732	60678	62027	85596	62247	54192	47446	31515	31090	37651	31769	35811	34777	37644	40609	39199	36611
Zmdp000292	189.14	70.07	188.127	C7H16N4O2	[M+H]+	Arginine methyl ester	Amino acids and derivatives	Amino acids and derivatives	-	2	183700	303140	246740	261220	232220	343590	216200	169900	236380	214520	156650	233580	194370	182230	175800	149710	220230	156020	172850
Zmjp000182	189.13	70.07	188.127	C7H16N4O2	[M+H]+	N-Monomethyl-L-arginine	Amino acids and derivatives	Amino acids and derivatives	17035-90-4	2	214920	166430	232330	218380	247700	315730	189180	213590	202100	233330	180300	242520	214100	197130	217160	166650	204230	185000	185860
pmf0348	187.13	97	188.141	C10H20O3	[M-H]-	2,6-Dimethyl-7-octene-2,3,6-triol	Others	Saccharides and Alcohols	73815-21-1	3	275270	313890	313800	562980	499530	484540	677610	587530	687650	186640	154730	207700	605910	720640	698660	346850	425870	419220	415850
Zmzp000145	189.16	84.08	188.152	C9H20N2O2	[M+H]+	Trimethyllysine	Amino acids and derivatives	Amino acids and derivatives	23284-33-5	2	336340	280120	336250	106140	101580	203070	273230	243380	353840	328500	307500	448680	254130	337000	215610	135090	174560	219540	194300
Zmtn001624	188.04	144.05	189.043	C10H7NO3	[M-H]-	N-Acetylisatin	Alkaloids	Plumerane	574-17-4	3	112830	110480	122510	143680	75203	108290	262520	256800	309150	29513	26377	22847	130630	170870	125940	119560	125950	105010	143900
pme0075	188.06	128	189.064	C7H11NO5	[M-H]-	N-Acetyl-L-glutamic acid	Amino acids and derivatives	Amino acids and derivatives	1188-37-0	1	405680	427180	432120	1903400	946220	1069800	474620	376230	400630	206590	226150	196310	377010	797340	399220	594970	512000	459560	455520
mws0193	190.12	127	189.111	C7H15N3O3	[M+H]+	L-Homocitrulline	Amino acids and derivatives	Amino acids and derivatives	1190-49-4	2	133940	97768	97374	91095	84802	79909	50496	84728	112620	161410	137500	174640	54562	71918	78723	77997	75300	90627	119430
pme0278	191.1	128	190.095	C7H14N2O4	[M+H]+	2,6-Diaminooimelic acid	Amino acids and derivatives	Amino acids and derivatives	583-93-7	2	650940	559570	489900	448910	406780	433180	989810	806510	811680	698490	606320	734430	392230	616540	525410	418260	427180	471460	471580
Lmyp003387	192.07	146.06	191.058	C10H9NO3	[M+H]+	2-Oxo-3,4-dihydro-1H-quinoline-3-carboxylic acid	Alkaloids	Quinoline alkaloids	246867-17-4	3	68129	97775	92380	47472	50344	94213	53856	64454	78986	122790	93656	82407	155330	142450	144300	150960	146070	164780	155900
mws0281	191.02	111.01	192.027	C6H8O7	[M-H]-	Citric Acid	Organic acids	Organic acids	77-92-9	1	331520	269580	302710	1570200	766460	1350200	565450	335410	471450	79418	120180	108130	204310	196750	195240	229240	153790	165530	246300
Zmyn000453	191.02	111.01	192.027	C6H8O7	[M-H]-	Isocitric Acid	Organic acids	Organic acids	320-77-4	1	16602000	16608000	15893000	30398000	28437000	30046000	13653000	11050000	11296000	7288600	7213500	7707800	8051100	8943100	9703800	11987000	10814000	10373000	11032000
mws0277	191.06	85	192.063	C7H12O6	[M-H]-	Quinic Acid	Organic acids	Organic acids	77-95-2	2	6165700	5709500	6113000	12143000	10654000	12403000	5425600	3898400	4300700	2469900	2515800	2752400	2695600	3142300	3305600	4446100	3885100	3854700	4013100
pme2743	194.08	91	193.074	C10H11NO3	[M+H]+	N-Phenylacetylglycine	Amino acids and derivatives	Amino acids and derivatives	500-98-1	2	11354	11982	4253	25816	5646	32188	38504	33978	20486	2109.8	1778.5	8489.8	10205	31074	27912	22632	24060	33951	22618
mws1189	193.04	72.8	194.033	C6H10O7	[M-H]-	D-Galacturonic acid	Organic acids	Organic acids	685-73-4	2	64102	105300	140220	194950	71934	161440	112460	139600	155080	89632	54937	74332	106380	221030	166370	60603	127620	184350	116250
mws0014	193.05	134.01	194.058	C10H10O4	[M-H]-	Ferulic acid*	Phenolic acids	Phenolic acids	537-98-4	1	1473000	1466500	1231700	2011600	1776200	1703300	1419600	1408900	1363600	1932900	1796500	1791000	1673800	1751400	1564100	1692300	1461800	1452900	1615200
MWSmce632	195.06	93.03	194.058	C10H10O4	[M+H]+	Vanillin acetate	Phenolic acids	Phenolic acids	881-68-5	3	73734	76628	85479	197160	176340	191530	343030	328640	303320	98427	83950	83226	227280	321110	259730	142630	163500	181980	181570
MWSslk097	195.06	163.04	194.058	C10H10O4	[M+H]+	Dimethyl phthalate	Phenolic acids	Phenolic acids	131-11-3	3	16802	10189	10564	25952	19695	14682	16995	22556	20472	21357	22638	34377	27318	24591	22914	29469	30687	34168	33684
pme0422	193.06	134	194.058	C10H10O4	[M-H]-	Isoferulic Acid*	Phenolic acids	Phenolic acids	537-73-5	3	1350400	1243100	974910	1781600	1659200	1571300	1389000	1310800	1297000	1641800	1575700	1725000	1538900	1492300	1426300	1544400	1347000	1301800	1481900
Wmln000659	193.07	101.02	194.18	C10H10O4	[M-H]-	3-Methyl-4,8-dihydroxy-3,4-dihydroisocoumarin	Phenolic acids	Phenolic acids	33788-22-6	3	7716.6	4077.9	7133.8	20994	2747.5	13229	15444	15536	29837	13144	3693	5733.8	16838	25478	12630	16742	18007	6996.8	13470
MWS1771	196.1	91.05	195.09	C10H13NO3	[M+H]+	L-Tyrosine methyl ester	Amino acids and derivatives	Amino acids and derivatives	1080-06-4	3	22771	18580	24783	22148	8667.8	28126	21515	17087	24482	19003	18332	15525	15499	22261	10454	13289	13273	12071	13526
pme0534	195.05	74.9	196.058	C6H12O7	[M-H]-	Gluconic acid	Others	Saccharides and Alcohols	526-95-4	1	1217300	1503900	1172500	9884700	3533900	7674700	6840400	5589800	6434300	275480	359070	408060	3865100	7574000	3860500	3090700	2731900	2875400	3442600
pmf0319	195.07	137	196.074	C10H12O4	[M-H]-	Acetosyringone	Phenolic acids	Phenolic acids	2478-38-8	3	11581	10958	12458	21170	6648.5	16912	10951	12058	28030	5521	11478	21165	9789.5	15728	9740	7323	9674.2	12676	10606
Lmlp002205	197.12	161.1	196.109	C11H16O3	[M+H]+	Isololiolide	Terpenoids	Terpene	38274-00-9	2	7752	10892	5629.8	14713	10530	13369	15364	13756	22493	16593	18301	9790.5	14098	20201	16539	14263	9850.2	15433	18169
mws0027	197.05	123	198.053	C9H10O5	[M-H]-	Syringic acid	Phenolic acids	Phenolic acids	530-57-4	1	157870	143470	133700	296450	290270	248830	132380	135070	157240	103230	102450	103980	186530	168610	167030	156290	161540	140480	184870
Lmxn008846	197.12	153.13	198.126	C11H18O3	[M-H]-	Hydroxydihydrobovolide	Others	Others	6067-11-4	1	57383	53248	63001	75440	70994	71874	54728	49110	57123	36561	36334	39428	60051	65109	57047	57200	52229	49620	56953
Zmzn000079	199	78.96	200.009	C4H9O7P	[M-H]-	D-Erythrose-4-phosphate	Others	Saccharides and Alcohols	585-18-2	3	78710	114630	73663	88616	55001	125920	102580	66101	83392	28371	26615	26827	45807	62942	54143	52333	59901	46571	61357
pmb2640	199.17	199.17	200.178	C12H24O2	[M-H]-	Dodecanoic acid (Lauric acid)	Lipids	Free fatty acids	143-07-7	1	168000	165540	158740	201610	198480	198350	213390	211340	207840	118250	115140	123720	160950	188240	177880	148370	167200	157140	163470
MWS0631	199.97	80.96	200.977	C3H7NO5S2	[M-H]-	S-Sulfo-L-Cysteine	Amino acids and derivatives	Amino acids and derivatives	1637-71-4	3	7557.1	5250	5535.3	8006.1	2339.6	4564.3	6363.3	465.39	5097.9	1432.1	5970	1397.5	6918.9	5047.7	1815.3	4695.3	2283	7329.6	5109.2
pmb0130	203.12	144	202.111	C12H14N2O	[M+H]+	Acetryptine	Alkaloids	Phenolamine	3551-18-6	3	88461	48821	30400	77782	30360	408910	130460	83885	158870	12812	18514	42490	46460	75464	133890	50446	50628	62977	50237
MWS1844	203.14	129.07	202.136	C14H18O	[M+H]+	2-Pentyl-3-phenyl-2-propenal	Others	Others	122-40-7	3	12413	7551.4	7718.9	7722.7	6935.2	4141	6336.8	7089.1	7126.7	5638.4	6989.2	6756.7	7022.5	6999.8	5831.1	5184.6	5717.3	4558	7905.2
NK10251888	203.15	70.07	202.143	C8H18N4O2	[M+H]+	NG,NG-Dimethyl-L-arginine	Amino acids and derivatives	Amino acids and derivatives	30315-93-6	1	402080	314570	264130	483790	341830	389450	379540	450230	365250	392450	396000	442100	378120	278860	353910	278740	277920	308730	271720
MWS5164	203.15	70.07	202.143	C8H18N4O2	[M+H]+	N,N'-Dimethylarginine;SDMA	Amino acids and derivatives	Amino acids and derivatives	30344-00-4	1	399250	426440	381290	511650	382780	566890	409420	425970	486530	427490	446580	524330	343150	318320	367050	316630	357820	390410	389030
mws0018	203.22	83	202.216	C10H26N4	[M+H]+	Spermine	Alkaloids	Phenolamine	71-44-3	2	3171300	3631000	3380600	5045500	4948800	5618400	2425700	1947200	3472400	1599400	1230300	1658200	2526100	2435200	2937300	2365700	2365900	2788700	2754800
MWSmce056	205.09	146.06	204.09	C11H12N2O2	[M+H]+	DL-Tryptophan	Amino acids and derivatives	Amino acids and derivatives	54-12-6	1	5361500	7057800	5609100	8140800	6432400	10472000	10491000	9985100	11691000	5484800	4893600	5980800	11105000	11612000	10939000	8115700	7983900	8858600	9623500
mws0282	203.08	116.05	204.09	C11H12N2O2	[M-H]-	L-Tryptophan	Amino acids and derivatives	Amino acids and derivatives	73-22-3	1	2037600	2509300	1962500	2884800	2500400	3718700	3953000	3672100	4168300	1931900	1738800	2133300	3667500	3750100	3854100	3514400	3371900	3205200	3393600
Zmbp002538	205.1	146.06	204.09	C11H12N2O2	[M+H]+	1-Methoxy-indole-3-acetamide	Alkaloids	Alkaloids	-	3	6619400	8834200	6794700	10109000	9589900	13056000	13247000	12920000	14222000	7174600	6319800	7353300	14054000	13898000	12793000	10563000	10035000	10877000	11390000
pmb0818	206.1	147.5	205.074	C11H11NO3	[M+H]+	Methoxyindoleacetic acid	Alkaloids	Plumerane	3471-31-6	3	138080	176120	161300	203920	204780	308940	281470	305610	321540	169950	135870	164210	289810	263180	301880	250070	248950	226190	230350
Lmyp003025	206.08	146.06	205.074	C11H11NO3	[M+H]+	Coixlactam	Alkaloids	Quinoline alkaloids	-	3	5360.2	11207	17437	7476.4	6247	13039	6880.8	3398.8	2195.5	13590	15906	13408	6087	10645	9932	11259	7710.8	6889.2	14343
MWS0618	204.12	71.05	205.131	C9H19NO4	[M-H]-	Pantothenol	Others	Saccharides and Alcohols	16485-10-2	3	8724.7	13085	10785	10198	8995.3	7284.2	12287	15760	12119	26532	30545	27567	10805	11077	8950.5	12146	13769	15146	13358
HJAP035	207.1	176.08	206.094	C12H14O3	[M+H]+	1-(4-Methoxyphenyl)allyl acetate	Phenolic acids	Phenolic acids	61691-82-5	3	8752.2	9543.3	9729.5	19429	14741	26365	12929	9277.8	10353	14715	13949	10858	20750	16042	13136	15665	14766	21954	20117
Lmbn013410	205.16	189.13	206.167	C14H22O	[M-H]-	2,4-Di-Tert-Butylphenol*	Phenolic acids	Phenolic acids	96-76-4	2	137400	140890	142830	124330	134900	131070	134920	111650	153790	158320	135120	137730	120490	126470	133600	147310	131300	100560	147620
Lmln010063	205.16	189.13	206.167	C14H22O	[M-H]-	2,6-Di-tert-butylphenol*	Phenolic acids	Phenolic acids	128-39-2	2	150230	141330	124100	100540	132910	116070	127330	120530	137670	144420	128280	138230	124210	131610	124610	145590	123760	100690	141980
Zmgn002106	206.08	58.03	207.09	C11H13NO3	[M-H]-	N-Acetyl-L-phenylalanine	Amino acids and derivatives	Amino acids and derivatives	2018-61-3	3	35029	6668.2	29784	26022	20436	20656	20800	22414	16788	15936	13404	14239	25817	15334	15249	18897	12965	21338	26850
MWSslk120	208.1	120.08	207.09	C11H13NO3	[M+H]+	N-Acetyl-DL-phenylalanine	Amino acids and derivatives	Amino acids and derivatives	2901-75-9	3	252140	435130	310220	173130	34415	93945	287130	113000	168480	21369	22951	18381	45452	113380	134880	85529	76167	88010	103560
MA10107783	207.03	119.05	208.037	C10H8O5	[M-H]-	3-[(1-Carboxyvinyl)oxy]benzoic acid	Phenolic acids	Phenolic acids	16929-37-6	3	9813	31693	18077	6299.5	22824	11271	31435	28893	25762	27614	42411	55865	41523	51178	28910	23069	22771	35755	34690
MWSmce083	207.07	133.03	208.074	C11H12O4	[M-H]-	Ferulic acid methyl ester	Phenolic acids	Phenolic acids	2309-07-1	3	90337	96501	114930	77086	89933	85488	116940	111100	99605	53326	58215	62856	89699	90715	85417	68440	68712	70188	77953
pme3443	207.07	192	208.074	C11H12O4	[M-H]-	Sinapinaldehyde	Phenolic acids	Phenolic acids	4206-58-0	1	424900	452610	465270	638840	587430	655250	240900	269170	239880	248750	279500	292460	568140	501340	489610	471170	453180	380440	467910
pmb2620	207.07	133.1	208.074	C11H12O4	[M-H]-	3,4-Dimethoxycinnamic acid	Phenolic acids	Phenolic acids	14737-89-4	2	62802	64822	66006	57134	44598	43363	79629	65936	59597	29539	35860	31848	51407	51547	64110	37656	44028	45305	44919
Lmsn000954	207.09	59.01	208.095	C8H16O6	[M-H]-	Dambonitol	Others	Saccharides and Alcohols	523-94-4	3	52864	24735	36667	117890	34454	124650	120940	125480	118440	22401	30004	29398	69836	83766	69472	73820	81616	89677	62775
Zmpn000199	209.03	85.03	210.038	C6H10O8	[M-H]-	D-Galactaric acid*	Others	Saccharides and Alcohols	526-99-8	2	48291	94908	98084	96001	45098	114370	96534	88900	89876	106420	84710	91496	147870	151290	118130	106910	96896	106760	108810
Zmyn000108	209.03	85.03	210.038	C6H10O8	[M-H]-	D-Saccharic acid*	Others	Saccharides and Alcohols	87-73-0	2	55500	99338	89619	154620	56214	163280	74285	116630	110220	78818	97814	107880	130380	152670	120560	95176	126930	118950	110900
Hmcn000192	209.07	59.01	210.073	C7H14O7	[M-H]-	Sedoheptulose	Others	Saccharides and Alcohols	3019-74-7	2	93088	118440	126290	242980	75120	305620	106640	228910	258210	81652	107890	48262	210280	237080	151750	92502	234460	201230	226860
Zmjp003163	211.13	55.05	210.126	C12H18O3	[M+H]+	Jasmonic acid	Organic acids	Organic acids	77026-92-7	2	5478.4	9	6945	12124	6723.8	3514.5	9	9	9	18475	11834	13409	16019	14933	10948	20627	20001	16411	14352
MWStz261	211.14	70.07	210.137	C11H18N2O2	[M+H]+	Cyclo(D-Leu-L-Pro)	Amino acids and derivatives	Amino acids and derivatives	36238-67-2	2	15466	10339	16286	22930	13287	9614	15536	8882.5	15528	1470	1473.5	2952.8	5162.5	12580	3695.2	8869	4434.5	14710	12589
MWSmce355	211.06	181.01	212.068	C10H12O5	[M-H]-	Methyl Syringate	Phenolic acids	Phenolic acids	884-35-5	3	5536.4	3171.1	4636.9	3758.6	3559.5	5109.5	5125.6	4837.4	6594.6	7432	5110.4	3123.8	6182.8	5376.2	5237	5386.1	4202.4	4347.9	6245.4
pme2710	211.1	167	212.141	C12H20O3	[M-H]-	Dihydrojasmonic acid	Organic acids	Organic acids	3572-64-3	3	22019	17020	24437	35357	26723	25758	13242	25034	18799	7253.3	9	8538	29658	16781	20787	30837	26930	17531	22545
mws0863	213.02	97	214.024	C5H11O7P	[M-H]-	2-Deoxyribose-5'-phosphate	Nucleotides and derivatives	Nucleotides and derivatives	102916-66-5	2	92065	148790	97456	97852	58112	55445	71444	68043	81880	165540	193370	156750	161570	197910	132430	276720	163030	150690	187390
pmb2507	213.1	97	214.024	C5H11O7P	[M-H]-	2-Deoxyribose-1-phosphate	Nucleotides and derivatives	Nucleotides and derivatives	17210-42-3	1	224100	274540	168690	223040	121660	179630	142700	143740	170210	336390	294370	332670	338630	315790	295430	440000	425050	322600	412890
MWS1900	215.13	153.13	216.136	C11H20O4	[M-H]-	Undecanedioic acid	Lipids	Free fatty acids	1852-04-6	1	103400	107690	104960	152340	138180	146110	119920	109170	117800	60626	70116	64837	162870	181530	161570	127320	118040	123760	128150
pme2566	217.08	199	218.09	C8H14N2O5	[M-H]-	5-L-Glutamyl-L-amino acid	Amino acids and derivatives	Amino acids and derivatives	5875-41-2	2	425260	424200	429660	497280	432220	472510	393710	320560	356330	371210	381590	414790	393560	410050	431580	433950	449020	400480	443900
mws0677	219.11	160	218.106	C12H14N2O2	[M+H]+	N-Acetyl-5-hydroxytryptamine	Alkaloids	Alkaloids	1210-83-9	2	56040	46727	33810	66710	61130	56066	50745	47269	68510	61070	67332	92046	97764	104940	75923	118860	128240	94850	123830
MWSmce257	218.11	88.04	219.111	C9H17NO5	[M-H]-	D-Pantothenic Acid	Others	Vitamin	79-83-4	1	780490	745290	844720	857470	790630	823510	1011000	918630	934160	1006300	992490	1027200	1047100	1068700	1002700	1042600	974120	949640	1047600
pme1228	221.09	204	220.085	C11H12N2O3	[M+H]+	5-Hydroxy-L-tryptophan	Amino acids and derivatives	Amino acids and derivatives	56-69-9	1	16827	17416	16244	11535	16859	17989	19851	24441	21250	28704	25035	31747	32143	27096	28569	24638	23242	24934	24705
Hmyp002656	222.08	130.06	221.068	C11H11NO4	[M+H]+	Methyl dioxindole-3-acetate	Others	Others	57061-18-4	3	20933	18121	20483	22147	21936	27241	35318	22956	23350	18900	20029	27360	45590	30206	21339	37735	22419	36378	36101
mws2608	222.1	84.05	221.09	C8H15NO6	[M+H]+	N-Acetyl-D-galactosamine	Others	Saccharides and Alcohols	1811-31-0	2	474010	492590	333540	531950	579570	472020	423470	559200	433940	591880	603580	604890	587490	586540	504810	451300	526970	493410	596790
mws4174	222.1	138	221.09	C8H15NO6	[M+H]+	N-Acetyl-D-mannosamine	Others	Saccharides and Alcohols	7772-94-3	2	893080	936210	721060	1004900	1039200	1044000	946080	966300	829220	1286900	1238600	1306100	1126300	965680	1064600	903800	977900	1042700	1026800
pme2755	222	144	221.09	C8H15NO6	[M+H]+	N-Acetyl-D-glucosamine	Others	Saccharides and Alcohols	7512-17-6	3	84219	87022	67954	188740	121340	161560	43976	81037	87499	32338	13621	66731	52785	64833	73809	81192	59338	59984	88693
pme2773	223.07	134	222.067	C7H14N2O4S	[M+H]+	L-Cystathionine	Amino acids and derivatives	Amino acids and derivatives	56-88-2	2	284750	329770	338860	208950	74238	124990	391830	325940	428320	431860	363560	497810	210250	218260	315510	187630	221140	229770	246410
MWS4296	223.11	120.08	222.1	C11H14N2O3	[M+H]+	Glycylphenylalanine	Amino acids and derivatives	Amino acids and derivatives	3321-03-7	3	95192	103520	108440	277380	70752	230480	246620	113960	318860	26579	13894	47013	51029	88700	87041	68167	72520	68492	68862
mws5042	223.11	120.09	222.1	C11H14N2O3	[M+H]+	L-Glycyl-L-phenylalanine	Amino acids and derivatives	Amino acids and derivatives	721-66-4	2	113090	118790	94746	286580	87242	234350	272470	113390	302920	18823	17011	68214	46437	83968	106460	47293	63693	79090	63001
Hmlp013407	223.21	111.08	222.198	C15H26O	[M+H]+	β-Eudesmol	Terpenoids	Sesquiterpenoids	473-15-4	3	1965100	2014000	2048300	2011200	2098400	2100400	1981100	2016200	1952200	2112000	2057900	2088000	2024100	1969200	2000900	1929400	2008500	2067800	2130500
mws0520	224.09	136	223.084	C11H13NO4	[M+H]+	N-Acetyl-L-tyrosine	Amino acids and derivatives	Amino acids and derivatives	537-55-3	2	59331	94500	72957	43937	12774	40451	47559	40271	74437	9965.5	8448.6	16524	19066	49353	28793	21058	19923	20945	32875
Zmln002252	223.03	149.03	224.032	C10H8O6	[M-H]-	Sideretin (5,7,8-Trihydroxy-6-methoxycoumarin)	Lignans and Coumarins	Coumarins	-	3	62140	62126	59180	96690	81780	86304	56550	62346	71809	120970	101560	91256	61190	76837	74155	65368	77581	82960	66884
mws4085	223.06	193	224.068	C11H12O5	[M-H]-	Sinapic acid	Phenolic acids	Phenolic acids	530-59-6	1	42375	32156	47779	48152	26329	63837	36712	28440	21954	60994	57396	76108	39970	33645	28947	44924	33426	32048	42966
Lmyp003951	227.09	181.09	226.084	C11H14O5	[M+H]+	3-Hydroxy-1-(4-hydroxy-3,5-dimethoxyphenyl)propan-1-one	Phenolic acids	Phenolic acids	-	2	82677	67237	60180	73198	86831	91303	39394	55419	36225	64707	38892	53862	68168	80681	64694	63654	61722	74982	52569
pmb2643	225.19	207	226.193	C14H26O2	[M-H]-	Myristoleic acid	Lipids	Free fatty acids	544-64-9	2	2806.9	3114	4009.7	5351.8	4231.4	3399.9	9724.6	5684.9	6452.3	3625.8	1986.4	3085.3	3005	3154.3	4318.8	4815.7	3243.4	2358.7	4723
pme1194	228.1	112	227.091	C9H13N3O4	[M+H]+	2'-Deoxycytidine	Nucleotides and derivatives	Nucleotides and derivatives	951-77-9	1	24417	30306	32903	26974	24902	19452	17463	23897	15200	19052	21567	11527	31179	39883	27597	19681	24288	30791	27201
mws0119	227.2	227.2	228.209	C14H28O2	[M-H]-	Myristic Acid	Lipids	Free fatty acids	544-63-8	1	6331400	6399000	5151500	11527000	10987000	10714000	11796000	10760000	11231000	3975900	4445600	4837500	6555800	8095200	7398500	8800700	8789400	7674700	8658700
Lmhp001670	231.16	72.08	231.17	C11H22N2O3	[M+H]+	L-Valyl-L-Leucine	Amino acids and derivatives	Amino acids and derivatives	3989-97-7	3	119790	64144	123670	180570	83678	81144	617140	164920	199670	31370	28575	36948	89205	135230	50386	65361	73264	72520	99771
Zmdn004719	233.08	189.06	234.089	C13H14O4	[M-H]-	2-(2'-hydroxypropyl)-5-methyl-7-hydroxychromone	Others	Others	-	3	94222	188190	45361	4242	3048	5446.5	190920	39898	233600	34797	66924	34444	17843	21139	42491	37099	27799	42556	34717
pmb0490	235.14	147.04	234.137	C13H18N2O2	[M+H]+	p-Coumaroylputrescine	Alkaloids	Phenolamine	34136-53-3	1	1047600	1045200	954900	441520	971430	691630	1360700	1457300	3481900	106640	168770	93039	1299200	1235200	1530800	524630	552010	638370	633280
pmb0962	235.1	118.3	234.158	C10H22N2O4	[M+H]+	L-Lysine-Butanoic Acid	Amino acids and derivatives	Amino acids and derivatives	80407-71-2	3	2217100	2753700	2670900	1276800	877370	1664800	4880300	3014600	5020600	2510300	3201800	2465800	2934900	5287400	3865700	2357700	2626700	2691600	2957600
mws4176	237.12	120.09	236.116	C12H16N2O3	[M+H]+	L-Alanyl-L-Phenylalanine	Amino acids and derivatives	Amino acids and derivatives	3061-90-3	2	15590	23639	23980	33378	22027	32059	46795	31952	49336	21220	16850	20254	38197	32525	24533	34361	35971	28819	33780
Lmhn003240	237.04	121.03	238.048	C11H10O6	[M-H]-	Benzoylmalic acid	Phenolic acids	Phenolic acids	22138-51-8	2	23369	18749	20908	21574	22380	16262	25885	21059	21370	35911	44287	49542	51068	59665	54192	58429	54522	36828	43678
pme0428	237.08	103	238.084	C12H14O5	[M-H]-	3,4,5-Trimethoxycinnamic acid	Phenolic acids	Phenolic acids	90-50-6	3	6349.2	4800.8	6225.6	6768.1	3874.9	4314.7	6229.2	5410.8	5858.6	10653	9512.1	9133.6	4826	6930.6	5110.9	5462.2	6445.4	5786.6	7025.2
pmn001669	237.08	147	238.084	C12H14O5	[M-H]-	Methyl sinapate	Phenolic acids	Phenolic acids	20733-94-2	2	13891	14872	17548	16607	17016	12339	9251.9	7340.1	8955.4	25436	31983	35025	20417	17121	19615	21595	17727	20028	20865
pmn001320	237.08	163.04	238.084	C12H14O5	[M-H]-	1-O-p-Cumaroylglycerol	Phenolic acids	Phenolic acids	106055-11-2	1	26399	21835	25955	64157	47933	68722	9764.2	11480	20633	10197	10997	8437.5	29998	22374	20780	23434	27196	19498	26273
mws0221	241.03	152	240.024	C6H12N2O4S2	[M+H]+	L-Cystine	Amino acids and derivatives	Amino acids and derivatives	56-89-3	2	52338	62646	95843	145090	44783	283280	71902	45552	57335	12910	18881	21121	38350	50742	55944	96743	101950	64246	119790
Zmdn011161	239.07	223.03	240.079	C15H12O3	[M-H]-	Chrysophanol-9-anthrone	Quinones	Anthraquinone	491-58-7	2	411240	302830	480130	412590	534830	524030	437610	333010	519940	581900	481810	652270	441690	502430	553210	389430	416840	375060	486210
MWS0552	239.2	223.03	240.209	C15H28O2	[M-H]-	Cis-10-Pentadecenoic Acid(C15: 1)	Lipids	Free fatty acids	84743-29-3	2	401740	302750	455520	418230	499900	457260	424000	365000	469260	580460	526950	703050	406220	460380	560390	392190	415130	428660	523370
pme2827	239	223	240.245	C16H32O	[M-H]-	Palmitaldehyde	Lipids	Free fatty acids	629-80-1	1	42419000	45917000	49137000	48443000	50587000	48048000	49407000	48208000	42973000	54511000	57140000	59727000	52716000	52442000	50800000	34151000	35752000	36079000	40661000
MWS2910	242.11	126.07	241.106	C10H15N3O4	[M+H]+	5-Methyl-2'-Deoxycytidine	Nucleotides and derivatives	Nucleotides and derivatives	838-07-3	3	11131	11525	20623	17839	15636	13834	7152.7	5488.5	10341	12164	13566	10377	10590	31622	9993.4	13372	17670	22798	19727
mws1383	243.09	145	242.08	C12H10N4O2	[M+H]+	Lumichrome	Alkaloids	Alkaloids	1086-80-2	1	42145	35229	40451	38692	22124	40064	51414	44408	71172	44297	38042	47000	42493	63849	59940	53050	33581	49182	48323
pme0264	243.1	127	242.09	C10H14N2O5	[M+H]+	Thymidine	Nucleotides and derivatives	Nucleotides and derivatives	50-89-5	1	106020	119510	102340	115180	108620	123300	119290	37812	72674	49744	35244	50980	118430	194310	132690	108890	105400	120890	118220
MWS2430	241.22	241.21	242.225	C15H30O2	[M-H]-	13-methylmyristic acid	Lipids	Free fatty acids	2485-71-4	1	285590	267710	284240	369950	291470	329910	395290	300870	454260	227310	221670	275180	297750	582290	360480	339140	355210	315900	344420
mws0359	241.22	241.22	242.225	C15H30O2	[M-H]-	Pentadecanoic Acid	Lipids	Free fatty acids	1002-84-2	1	378140	378600	379580	405420	421110	417940	357060	304440	394030	306490	244230	285020	365760	442920	446850	403060	389250	464430	418390
ML10180524	244.09	112.05	243.086	C9H13N3O5	[M+H]+	Cytarabine	Nucleotides and derivatives	Nucleotides and derivatives	147-94-4	1	250280	259140	274020	401390	287510	405880	293800	250270	353200	182700	161190	150530	245850	322340	249470	224090	241610	201970	237590
pme3732	244.09	112	243.086	C9H13N3O5	[M+H]+	Cytidine	Nucleotides and derivatives	Nucleotides and derivatives	65-46-3	1	1585900	1871400	2107900	3172000	2365900	2626300	1652000	1666200	2352000	998180	1148400	1228100	1768300	2067200	1757600	1601100	1581000	1724500	1786800
mws0976	243.06	153	244.07	C9H12N2O6	[M-H]-	β-Pseudouridine	Nucleotides and derivatives	Nucleotides and derivatives	1445-07-4	1	70825	92905	67519	66376	39606	81996	138640	92818	83390	56022	35479	56353	68284	76751	90638	63548	67640	72789	72340
MWSmce295	245.07	113.03	244.07	C9H12N2O6	[M+H]+	1-beta-D-Arabinofuranosyluracil	Nucleotides and derivatives	Nucleotides and derivatives	3083-77-0	3	436470	527430	520200	783810	600340	810720	549140	544840	608770	403400	341580	467070	565050	487270	543610	412990	434380	537950	555430
mws0248	243.06	110	244.07	C9H12N2O6	[M-H]-	Uridine	Nucleotides and derivatives	Nucleotides and derivatives	58-96-8	1	497970	527390	459380	570750	498110	834890	753260	451770	565320	269390	364060	424550	377370	389140	495060	519670	376430	374010	413000
pme2266	245.1	227	244.088	C10H16N2O3S	[M+H]+	Biotin	Others	Vitamin	58-85-5	2	20670	26219	35694	49981	46246	38547	43589	43514	30538	42788	50640	44513	47663	33576	28644	26777	17912	26392	26522
MWS5231	243.16	181.16	244.167	C13H24O4	[M-H]-	Tridecanedioic acid	Lipids	Free fatty acids	505-52-2	2	49700	60984	58511	57744	68244	61082	57748	53560	57544	59838	63930	53995	63341	60197	68769	65774	57202	53698	58319
Lmhp002031	245.18	86.1	245.186	C12H24N2O3	[M+H]+	L-Leucyl-L-Leucine	Amino acids and derivatives	Amino acids and derivatives	3303-31-9	3	54016	14488	55083	63903	28460	26142	264200	126030	89924	8421.2	4360.5	18367	73975	161160	8204.2	33765	28058	37090	51414
Zmdp001647	247.13	184.1	246.122	C10H18N2O5	[M+H]+	γ-Glutamyl-L-valine	Amino acids and derivatives	Amino acids and derivatives	-	1	56894	63045	62160	51311	46513	79386	73557	61971	73215	86450	76195	78045	53868	63382	87324	45228	55445	57501	64823
pme2563	249.06	128	250.062	C8H14N2O5S	[M-H]-	γ-Glu-Cys	Amino acids and derivatives	Amino acids and derivatives	636-58-8	2	60725	72672	91651	54863	60093	45898	83420	73576	74495	22903	18162	15453	30088	23596	44816	29503	17026	23917	20599
pme3961	252.11	136	251.102	C10H13N5O3	[M+H]+	2'-Deoxyadenosine	Nucleotides and derivatives	Nucleotides and derivatives	958-09-8	1	1228400	1161600	1453000	1349400	947030	1387200	1222800	416860	819940	1142700	1162600	1404500	1463200	1908800	1181600	1436400	1559800	1707000	1660700
MWSHY0007	253.09	210.07	252.079	C16H12O3	[M+H]+	7-Methoxyisoflavone	Flavonoids	Isoflavones	1621-56-3	3	57123	12522	15737	6864.9	7573.9	1148.5	44148	25922	42411	747.65	5204.3	952.97	18125	17273	12082	6509.8	7733.9	7660.9	10403
pme2776	253.09	137	252.086	C10H12N4O4	[M+H]+	2'-Deoxyinosine	Nucleotides and derivatives	Nucleotides and derivatives	890-38-0	2	84778	80463	90923	78834	72536	80659	71876	24650	42484	88858	79303	101110	103130	113710	76426	93600	104920	121820	122100
Hmbp003234	255.09	163.03	254.079	C12H14O6	[M+H]+	1-O-Caffeoylglycerol	Lipids	Glycerol ester	-	3	25130	23736	20529	31696	30053	32698	26603	20525	17878	28006	20488	23610	48242	26368	32089	31894	16842	13189	32185
mws0361	253.22	235.19	254.225	C16H30O2	[M-H]-	Palmitoleic Acid*	Lipids	Free fatty acids	373-49-9	1	17680	11194	12883	21071	19313	16885	18466	21657	23880	19727	25233	16700	14449	20751	22934	15391	16419	13472	17297
Lmcn009122	253.22	235.21	254.225	C16H30O2	[M-H]-	(7Z)-Hexadecenoic acid*	Lipids	Free fatty acids	2416-19-5	1	33901	59972	30493	45830	42213	43849	119040	50575	60763	29851	27281	33688	29909	41602	42044	38282	33668	39414	39050
pma3101	256.2	124.1	256.082	C11H14NO6+	[M+H]+	Nicotinate D-ribonucleoside	Others	Vitamin	17720-18-2	1	2208800	2322900	1954200	2167600	2437900	2517200	1730800	2064900	1517100	1936100	1870100	1691900	1869900	1624200	1458100	1713700	1960800	2167800	2115700
mws1359	255.1	239	256.11	C16H16O3	[M-H]-	Pterostilbene	Others	Stilbene	537-42-8	2	5460.4	8184.7	9003.3	7643.1	9499.6	7769.1	8132.4	7755.4	7390.4	10481	13386	12279	8567.4	11087	9243.3	4685.5	5489.3	6358.6	6671.9
mws1488	255.23	237.22	256.24	C16H32O2	[M-H]-	Palmitic acid	Lipids	Free fatty acids	57-10-3	1	164660	210110	171950	243790	256410	232330	232100	227240	209370	180090	192210	181180	223740	220140	202590	173810	197110	215300	184100
mws0120	258.11	104.11	257.103	C8H20NO6P	[M+H]+	Choline Alfoscerate	Lipids	PC	28319-77-9	1	1883400	2080500	1877400	1814500	1675000	1789700	2213100	2207500	2245600	1643000	1581500	1759100	1585300	1548600	1669000	1636700	1604400	1436700	1542000
MWSslk133	257.18	195.18	258.183	C14H26O4	[M-H]-	1,14-Tetradecanedioic Acid	Lipids	Free fatty acids	821-38-5	2	25489	22943	24574	44646	27249	40794	26113	25400	31941	22371	21321	22470	32521	31621	37798	34924	33808	34130	31674
Zmyn000110	258.04	78.96	259.046	C6H14NO8P	[M-H]-	D-Glucosamine 1-phosphate	Others	Saccharides and Alcohols	2152-75-2	3	153500	204920	221030	246030	93747	279460	235190	250060	230940	117470	137160	132070	188460	249930	199170	125190	150670	167270	187270
MWS2442	259.02	96.97	260.03	C6H13O9P	[M-H]-	D-Fructose 6-Phosphate	Others	Saccharides and Alcohols	643-13-0	3	101590	87613	106310	224450	57613	124470	117750	66062	170690	23888	32658	43074	55652	85955	113360	81180	56487	72188	86958
mws1090	259.02	97	260.03	C6H13O9P	[M-H]-	Glucose-1-phosphate*	Others	Saccharides and Alcohols	59-56-3	1	66517	118980	148550	258920	33240	181370	102100	94890	206370	38656	59854	29698	89419	83025	83712	69140	93282	125350	125150
mws0866	259.02	97	260.03	C6H13O9P	[M-H]-	D-Glucose 6-phosphate*	Others	Saccharides and Alcohols	56-73-5	1	44356	77712	124500	233140	45705	184610	75591	106550	229630	41422	34455	40587	75400	118240	122530	60415	87704	73950	112060
Zmdp002216	261.14	86.1	260.137	C11H20N2O5	[M+H]+	L-γ-Glutamyl-L-leucine	Amino acids and derivatives	Amino acids and derivatives	2566-39-4	1	143980	130710	100590	160290	116400	197440	198910	148370	183020	261700	250420	312310	155020	225970	183840	152790	157630	152390	152530
MWS4309	262.12	188.07	261.111	C13H15N3O3	[M+H]+	Glycyl-tryptophan	Amino acids and derivatives	Amino acids and derivatives	2390-74-1	3	33413	26697	27482	70432	38988	52239	49023	38748	59757	12558	11072	13924	13048	33998	40236	22601	19745	25029	23462
Zmpn000095	261.04	78.96	262.045	C6H15O9P	[M-H]-	Sorbitol-6-phosphate	Others	Saccharides and Alcohols	20479-58-7	3	37822	62023	60270	38713	19870	36468	40740	29742	52952	42917	37942	55862	43564	48956	24258	42107	28085	16482	32769
MWSslk031	263.08	219.09	262.074	C16H10N2O2	[M+H]+	Indirubin	Alkaloids	Plumerane	479-41-4	3	9	9	9	2674.8	5412.7	4982.9	30262	29577	27874	9	9	9	10829	14655	8701.7	5131.7	3337.8	5174.3	4232
Lmhp001732	263.13	70.07	263.139	C14H18N2O3	[M+H]+	L-Prolyl-L-Phenylalanine	Amino acids and derivatives	Amino acids and derivatives	13589-02-1	1	40951	56031	37803	114730	20339	82591	75430	40665	106330	12065	17028	42292	11550	55213	28786	28621	32095	30296	30287
Hmjp000572	265.08	103.04	264.084	C10H16O8	[M+H]+	Kinsenoside	Others	Others	151870-74-5	3	19854	20529	18790	13414	10338	16665	21748	13445	23684	21942	25167	25892	12022	15515	7995.5	18939	17262	14050	12818
Hmjp000461	265.08	103.04	264.084	C10H16O8	[M+H]+	3-O-Glucoside-3-hydroxy-y-butyrolactone	Others	Others	-	3	50211	26597	39600	22258	25891	28504	31151	43108	23063	25125	11339	16768	37527	39185	28854	33694	35006	17318	28061
Lmtn004049	263.13	204.12	264.136	C15H20O4	[M-H]-	Abscisic acid	Organic acids	Organic acids	21293-29-8	2	6992.8	18052	7827.2	10435	11124	9715.9	12923	10131	12886	15606	14433	14572	54534	20176	18953	19876	17579	23600	20894
Lmhp002001	265.15	72.08	264.147	C14H20N2O3	[M+H]+	L-Valyl-L-Phenylalanine	Amino acids and derivatives	Amino acids and derivatives	3918-92-1	3	64140	33131	77433	76587	51052	61029	384340	100660	107810	12562	24784	24793	53818	68064	19904	41921	43526	52138	45012
Lmlp003161	265.15	177.06	264.147	C14H20N2O3	[M+H]+	N-Feruloylputrescine	Alkaloids	Phenolamine	501-13-3	2	480380	376260	364040	379840	325940	395190	681570	635650	547480	839230	461180	523020	623650	931240	484530	364590	484450	539910	529390
pmb0952	265.1	122.1	265.112	C12H17N4OS+	[M+H]+	Thiamine (Vitamin B1)	Others	Vitamin	70-16-6	3	229270	147850	198490	118290	210060	110580	102850	119440	141010	72214	63588	58865	205020	142320	160450	120350	187100	160420	190090
Hmsn000210	133.01	115.01	266.224	C17H30O2	[M-H]-	Methyl 7,10-hexadecadienoate	Lipids	Free fatty acids	-	1	10356	27163	39180	52302	20822	48239	13815	16496	32129	10312	12480	28934	33552	61343	28989	50995	11507	35037	35826
Zmgn001039	266.09	134.05	267.078	C9H17NO6S	[M-H]-	S-Ribosyl-L-homocysteine	Amino acids and derivatives	Amino acids and derivatives	-	2	30644	21040	30400	30240	26870	20084	38636	26253	35995	36015	25107	34218	21113	29105	30734	44283	35966	33999	44506
pme0230	268.1	136.06	267.097	C10H13N5O4	[M+H]+	Adenosine	Nucleotides and derivatives	Nucleotides and derivatives	58-61-7	1	55674000	49135000	51304000	71360000	74036000	69653000	60653000	61770000	65375000	38716000	37384000	42423000	57996000	51343000	53341000	47139000	54925000	54983000	55763000
pme1184	268.1	152	267.097	C10H13N5O4	[M+H]+	2'-Deoxyguanosine	Nucleotides and derivatives	Nucleotides and derivatives	961-07-9	2	408540	428980	460120	419170	321740	478040	599720	127490	370480	260040	238660	296500	426960	539030	364440	389580	465600	420690	454910
pme2890	269.06	136	268.055	C8H16N2O4S2	[M+H]+	L-Homocystine	Amino acids and derivatives	Amino acids and derivatives	626-72-2	2	104460	176940	182870	198230	178340	226860	201310	202690	137870	64974	119630	86818	158020	101250	167440	142570	122180	136270	131090
Zmyn003693	267.07	252.04	268.074	C16H12O4	[M-H]-	6-Hydroxy-2'-methoxyflavone	Flavonoids	Flavonoid	61546-59-6	2	5651.1	4569.6	2966.9	4863.1	3866.9	4370.3	4303.4	3063.2	5390	5803.7	5931.8	3478.7	4624.3	4582.3	4233.8	3093.6	3917.5	5038.5	3124
pme1119	269.09	137	268.081	C10H12N4O5	[M+H]+	Inosine	Nucleotides and derivatives	Nucleotides and derivatives	58-63-9	3	320650	375200	454460	527330	413390	643210	416370	347870	356520	268550	289050	305880	363800	289560	338280	406720	399620	442420	405730
mws1060	267.07	135	268.081	C10H12N4O5	[M-H]-	9-(Arabinosyl)hypoxanthine	Nucleotides and derivatives	Nucleotides and derivatives	7013-16-3	1	256370	263810	260600	406900	210650	463620	305480	198440	333340	171050	181510	229600	241880	286360	323880	403740	350280	359720	348770
pmp000086	269.1	177.05	268.095	C13H16O6	[M+H]+	1-Feruloyl-sn-glycerol	Phenolic acids	Phenolic acids	-	2	51715	87634	105490	38598	34411	33215	25631	23786	34113	33189	71736	59153	50540	38169	38195	40634	42624	37570	51955
pmp000087	269.1	177.05	268.095	C13H16O6	[M+H]+	2-Feruloyl-sn-glycerol	Phenolic acids	Phenolic acids	-	2	61658	83296	67570	35644	37894	39119	17837	33201	41947	50748	76178	49896	35895	39429	37258	32220	38350	48172	47201
mws0383	267.23	267.23	268.24	C17H32O2	[M-H]-	10-Heptadecenoic Acid	Lipids	Free fatty acids	29743-97-3	1	1421500	968960	1957800	5894000	1780300	3823800	9449400	5934000	6048000	261420	218740	188990	794410	6455700	3637900	1887100	2218200	2030000	1901900
MWS20169	269.05	254.02	270.053	C15H10O5	[M-H]-	2,5-dihydroxy-1-methoxy-anthraquinone	Quinones	Anthraquinone	-	3	1662.5	2773.9	1211.1	3443.8	2432.3	2279.6	1589.7	941.48	1570.5	4923.8	4383.1	3560.9	2944.6	2485.4	1905.8	3662.9	5215.9	3175.4	5179.8
Lmyn006227	269.05	151	270.053	C15H10O5	[M-H]-	Galangin (3,5,7-Trihydroxyflavone)	Flavonoids	Flavonoid	548-83-4	3	39708	35104	42868	69906	41601	65246	41618	34889	56313	33957	38746	43204	27271	39007	33641	41146	36957	32308	35143
MWS20151	271.06	153.02	270.053	C15H10O5	[M+H]+	Apigenin	Flavonoids	Flavonoid	520-36-5	2	21930	23972	25482	40042	28162	39486	20728	21812	33202	24514	29392	20469	21647	20797	18332	14595	22831	15994	17858
MWSHY0137	273.08	153.02	272.068	C15H12O5	[M+H]+	Naringenin (5,7,4'-Trihydroxyflavanone)	Flavonoids	Dihydroflavone	480-41-1	3	50979	34525	378530	68708	41052	93937	123430	150270	101110	88916	90625	94759	27566	36606	24102	50596	51131	48852	53214
mws0914	271.06	151	272.068	C15H12O5	[M-H]-	Pinobanksin*	Flavonoids	Dihydroflavonol	548-82-3	1	58597	40466	470400	99409	49169	131520	172120	205770	124130	124270	133170	139820	40553	42530	36034	77039	72761	69511	73189
pme2960	273.08	153	272.068	C15H12O5	[M+H]+	Naringenin chalcone*	Flavonoids	Chalcones	73692-50-9	2	40282	29726	344340	71229	31858	93571	127800	136920	83551	79212	93626	99615	34908	29780	26190	38685	45347	56048	50370
pme3475	273.08	153	272.068	C15H12O5	[M+H]+	Butin	Flavonoids	Dihydroflavone	492-14-8	2	42813	41342	319200	69057	35574	95608	126610	141260	86489	89261	86107	94181	24807	36046	29280	47609	40908	45913	50045
pme3472	271.09	107.6	272.09	C12H16O7	[M-H]-	Arbutin	Phenolic acids	Phenolic acids	497-76-7	3	19882	16664	16424	15590	13203	16524	4646.3	3495.3	6782.9	3640.5	10471	7332.9	9	4554.1	4619.2	9995.8	7617.7	8332.6	8077.9
Lmmn003323	271.23	225.22	272.235	C16H32O3	[M-H]-	2-Hydroxyhexadecanoic acid	Organic acids	Organic acids	764-67-0	2	1486200	1536300	1871700	1982200	2069300	1998700	3043400	2526100	3391600	1192200	1188400	2027100	1808300	2337200	2237300	2095400	1899800	1645900	1993900
pmb1452	275.1	213.2	273.267	C16H35NO2	[M+H]+	N-Lauryldiethanolamine	Lipids	Free fatty acids	1541-67-9	3	133010	84949	95310	105420	55262	75292	63015	84262	91980	86664	111390	92482	90653	61710	94511	84543	68992	56409	85489
pmp001264	274.27	256.27	273.267	C16H35NO2	[M+H]+	Hexadecylsphingosine	Lipids	Sphingolipids	-	1	9	29169	22385	124900	151560	139990	92004	111680	158910	9	9	9	9	71728	64695	38365	47383	51325	43062
Lmrj002793	277.12	120.08	276.112	C14H16N2O4	[M+H]+	Cyclo(Phe-Glu)	Amino acids and derivatives	Amino acids and derivatives	-	3	167590	158550	168650	276930	207280	258780	363430	235930	380150	177590	138540	252140	164750	265590	167270	165900	166870	210530	179890
pmb1574	277.2	93	276.209	C18H28O2	[M+H]+	9,12-Octadecadien-6-Ynoic Acid	Lipids	Free fatty acids	61481-29-6	3	6762.1	8974.4	17263	36475	28395	39967	39255	36101	53718	15054	9145.6	18922	40504	40047	21962	22577	25265	29760	22886
pma0461	277.22	93.1	276.209	C18H28O2	[M+H]+	14,15-Dehydrocrepenynic acid	Lipids	Free fatty acids	4154-44-3	3	235040	233770	350910	463230	355560	477620	351630	237650	346270	220060	164290	175280	442250	547760	443460	410940	401400	419270	432240
Zmdp001663	279.1	133.03	278.094	C10H18N2O5S	[M+H]+	γ-glutamylmethionine	Amino acids and derivatives	Amino acids and derivatives	17663-87-5	2	36544	28964	28416	32398	29196	40766	49084	30680	39046	98921	102820	117570	31907	47310	41901	36303	40356	37015	38971
mws1038	277.12	146	278.13	C11H22N2O4S	[M-H]-	Pantetheine	Others	Others	496-65-1	2	23689	29567	33497	18236	11564	9482	18262	24007	19544	12461	3124.4	1035.6	12719	15614	15819	9890.4	11139	13198	7459.2
Lmxp011770	279.16	149.02	278.152	C16H22O4	[M+H]+	Diisobutyl phthalate*	Phenolic acids	Phenolic acids	84-69-5	1	31378000	30476000	33465000	29150000	31252000	29829000	28420000	29347000	31064000	27680000	32629000	29418000	28985000	32707000	30612000	26483000	27770000	30639000	29141000
Lmlp012720	279.16	149.02	278.152	C16H22O4	[M+H]+	Dibutyl phthalate*	Phenolic acids	Phenolic acids	84-74-2	1	31606000	29685000	28715000	29938000	30663000	30464000	28503000	28046000	27199000	29562000	31913000	28684000	29800000	34831000	29765000	32501000	29352000	27716000	31887000
MWSmce341	279.16	149.03	278.152	C16H22O4	[M+H]+	Butyl isobutyl phthalate	Phenolic acids	Phenolic acids	17851-53-5	2	33620000	30387000	29255000	30342000	30256000	31561000	31926000	29305000	29517000	29848000	33347000	29866000	29804000	36229000	29685000	30410000	29253000	33707000	34332000
Lmhp003013	279.17	177.05	278.163	C15H22N2O3	[M+H]+	N-Feruloyl-Cadaverine	Alkaloids	Phenolamine	-	3	90750	81461	68052	87045	59452	80386	54207	46458	114470	69125	68699	69925	39963	35306	33586	47092	48533	66586	74939
pmb1650	279.2	149.4	278.225	C18H30O2	[M+H]+	Octadeca-11E,13E,15Z-trienoic acid	Lipids	Free fatty acids	25575-00-2	3	16680000	16002000	14202000	17110000	15261000	16458000	14711000	16848000	14766000	14831000	17658000	14875000	15180000	16399000	15909000	15566000	15132000	15161000	15333000
mws0367	277.22	277.22	278.225	C18H30O2	[M-H]-	α-Linolenic Acid	Lipids	Free fatty acids	463-40-1	1	21997000	20918000	20119000	24106000	22690000	23325000	24239000	23849000	24478000	21645000	23416000	22510000	22142000	23459000	22166000	21549000	23120000	23313000	23459000
MWSmce692	277.22	59.01	278.225	C18H30O2	[M-H]-	γ-Linolenic Acid	Lipids	Free fatty acids	506-26-3	1	450090	467450	422530	489730	477660	491690	514980	557330	542740	497010	501330	515220	460770	506410	509380	468000	504800	469080	506930
pmb0889	279.23	95.1	278.225	C18H30O2	[M+H]+	Punicic acid (9Z,11E,13Z-octadecatrienoic acid)	Lipids	Free fatty acids	544-72-9	1	5084600	5742300	5797200	18419000	18493000	19686000	26290000	25524000	25832000	4522000	4851400	4954200	16982000	19260000	16931000	11891000	11263000	12187000	12217000
Lmbn005923	277.22	59.01	278.225	C18H30O2	[M-H]-	Crepenynic acid	Lipids	Free fatty acids	2277-31-8	2	471590	443150	450880	510640	494310	502920	539620	566580	536260	487980	486150	507690	480950	515640	489730	500790	491880	497920	501200
Lmhn002926	279.05	163.04	280.058	C13H12O7	[M-H]-	p-Coumaroylmalic acid	Phenolic acids	Phenolic acids	-	1	166860	141180	144420	49803	44038	76312	71837	76993	59818	9	9	9	169830	132970	167750	87990	81300	43713	78367
mws0629	281.11	166	280.106	C13H16N2O5	[M+H]+	L-Aspartyl-L-Phenylalanine	Amino acids and derivatives	Amino acids and derivatives	13433-09-5	2	53329	45751	62775	63102	47173	67536	39624	38375	39008	56245	51908	55371	49674	61625	57825	62062	51355	44506	46181
Lmbp010382	281.12	91.05	280.11	C18H16O3	[M+H]+	6-Methoxy-2-(2-phenylethyl)chromone	Others	Others	84294-89-3	3	56300	62979	57172	47011	36420	44152	33218	43180	65210	65152	52634	41664	52783	51819	34637	18099	18942	19463	21206
pmp001245	280.15	221.08	280.138	C15H22NO4+	[M]+	Feruloylcholine	Alkaloids	Alkaloids	85927-25-9	2	9	9	9	129420	157940	116240	252490	220910	187210	9	9	9	59212	63912	103360	32536	42000	42903	51725
mws1491	279.23	279.23	280.24	C18H32O2	[M-H]-	Linoleic acid	Lipids	Free fatty acids	60-33-3	1	102790000	90676000	88748000	103640000	102150000	108690000	110410000	123670000	119030000	90232000	80418000	94321000	103640000	104350000	106010000	86234000	101700000	103890000	84132000
Lmbn006152	279.23	59.01	280.24	C18H32O2	[M-H]-	(9Z,11E)-Octadecadienoic acid	Lipids	Free fatty acids	2540-56-9	1	400420	368150	378390	492210	437750	456250	495460	438750	473280	367800	326410	365990	362640	378370	429530	385630	366220	400860	335530
Hmhp001812	282.12	136.06	281.112	C11H15N5O4	[M+H]+	2'-O-Methyladenosine	Nucleotides and derivatives	Nucleotides and derivatives	2140-79-6	1	604800	671060	955920	495700	406470	524750	542000	245630	589110	233390	198170	353150	341050	533010	495840	375500	395340	411120	427370
MWS4354	282.12	150.08	281.112	C11H15N5O4	[M+H]+	N6-methyladenosine	Nucleotides and derivatives	Nucleotides and derivatives	1867-73-8	1	69485	72202	77841	107210	63956	92474	128450	53931	78099	31333	21660	32907	76852	84560	69953	61248	56384	71065	61787
YC512118	282.28	247.24	281.272	C18H35NO	[M+H]+	Oleamide (9-Octadecenamide)	Lipids	Free fatty acids	301-02-0	1	19627	18559	35897	7061.4	6949.8	6845.5	25681	5686.2	10165	7780.5	9487.4	8241.2	4776.7	7481.8	5723.9	11029	11451	9514.9	12106
Zmgp004474	283.17	117.07	282.162	C19H22O2	[M+H]+	5-hydroxy-1,7-diphenyl-3-heptanone	Others	Others	-	3	25370	17405	28471	33787	34807	21408	54441	49183	53352	7577.8	3547.5	8662.9	17117	32036	31675	17652	19830	23194	22131
mws2623	281.25	281.25	282.256	C18H34O2	[M-H]-	11-Octadecanoic acid(Vaccenic acid)	Lipids	Free fatty acids	506-17-2	1	2008000	2276100	1901300	2356000	2441600	2466200	2453300	2349500	2288400	1777800	1690800	1730800	2051500	2221400	2322200	1806900	1910700	2487800	2007300
MWSmce520	281.25	155.09	282.256	C18H34O2	[M-H]-	Petroselinic acid	Lipids	Free fatty acids	593-39-5	3	12176	12101	12657	17118	13300	13967	15084	14189	14113	11477	11521	11133	14826	13733	11982	10873	10127	14725	11974
Zmyn007277	282.08	238.09	283.084	C16H13NO4	[M-H]-	Avenanthramide D	Alkaloids	Phenolamine	-	1	19114	21728	19739	20526	20222	21096	23107	18982	25730	26391	16403	21225	25141	30623	19127	22494	22431	17744	20255
pme1178	284.1	152	283.092	C10H13N5O5	[M+H]+	Guanosine	Nucleotides and derivatives	Nucleotides and derivatives	118-00-3	1	3163400	3159100	3725300	5244800	3317500	4564100	4275800	2306700	3758500	1969100	1783500	2887400	2275400	2492400	2698400	2442900	2646200	2724800	2645100
MWSmce333	284.1	152.06	283.092	C10H13N5O5	[M+H]+	Crotonoside; 2-Hydroxyadenosine	Nucleotides and derivatives	Nucleotides and derivatives	1818-71-9	3	1088700	1047900	1176200	1477200	1188400	1900300	1302300	827610	1126100	711940	625000	901340	728130	760460	800940	769780	804690	967430	930210
Hmqp002567	284.13	147.04	283.12	C17H17NO3	[M+H]+	P-Hydroxycinnamic acid p-hydroxyphenethylamine	Others	Others	-	3	3716.8	7133.3	53960	7636.5	2564.1	6449.2	27392	7391.1	36440	47548	30322	48152	34315	185270	35124	34349	25695	27122	27561
Zmwp005562	284.13	147.04	283.121	C17H17NO3	[M+H]+	cis-N-p-Coumaroyltyramine	Alkaloids	Phenolamine	-	3	7337.7	5453	48607	4575.8	3894.4	10145	26912	6925.2	35479	41008	44991	42749	37205	189160	34377	35768	30444	32732	30444
MWSmce089	284.12	147.04	283.121	C17H17NO3	[M+H]+	p-Coumaroyltyramine	Lignans and Coumarins	Coumarins	36417-86-4	3	3726	6203	51755	4522.8	3023.4	6734.6	25749	6078.9	34426	37646	39337	44115	33488	188200	28397	25396	28915	28145	30066
Zmzp005934	284.3	102.09	283.288	C18H37NO	[M+H]+	Stearamide	Alkaloids	Alkaloids	124-26-5	2	75198	82038	490530	97365	120270	84181	444530	177240	93840	62007	71825	43789	118200	40577	119500	110420	109870	117800	116870
mws0129	285.08	270	284.068	C16H12O5	[M+H]+	Genkwanin (Apigenin 7-methyl ether)	Flavonoids	Flavonoid	437-64-9	2	18548	13971	126140	17565	11646	14530	9732.7	12170	158290	9	9	9	2782.7	8563.5	4028.9	11686	15830	14583	14846
mws0051	285.08	270	284.068	C16H12O5	[M+H]+	Acacetin	Flavonoids	Flavonoid	480-44-4	2	13718	16204	119110	16013	12177	12944	7201	10207	173410	975.85	1051.7	351.58	2827.9	6980.3	4967.7	11811	16356	15238	16127
mws0918	283.06	268	284.068	C16H12O5	[M-H]-	Prunetin (5,4'-Dihydroxy-7-methoxyisoflavone)	Flavonoids	Isoflavones	552-59-0	2	140440	113910	1064700	140910	97752	114080	78674	100580	1549900	6807.3	3704.7	3742	24691	81280	24887	144420	137650	135830	144010
mws4160	285.08	270.07	284.068	C16H12O5	[M+H]+	Wogonin (5,7-Dihydroxy-8-Methoxyflavone)	Flavonoids	Flavonoid	632-85-9	2	10055	7715.6	70866	8287.5	6013.3	7600.2	6160.3	6749.8	82177	9	9	9	9	3064.9	1398.5	8879.4	7473.9	9490.7	9771.6
mws0668	283.07	151	284.076	C10H12N4O6	[M-H]-	Xanthosine	Nucleotides and derivatives	Nucleotides and derivatives	146-80-5	1	325990	317890	299850	386450	326630	358500	409200	353470	346030	119010	121370	114970	231810	187600	262590	241200	233400	222020	203010
Zmyn005026	283.26	283.26	284.272	C18H36O2	[M-H]-	16-Methylheptadecanoic acid	Lipids	Free fatty acids	2724-58-5	2	2453100	2612400	3232100	2932000	3295400	3739000	3247900	4573300	3841700	4380100	3293400	3515200	3518500	3076700	3133200	1184800	1204600	1054900	1153700
mws1489	283.26	283.26	284.272	C18H36O2	[M-H]-	Stearic Acid	Lipids	Free fatty acids	57-11-4	1	2547400	2513400	3346200	3050900	3407000	3770700	3418200	4731400	3860000	4463900	3376800	3567900	3660700	3097700	3132100	1155700	1121100	1035800	1201200
pma1751	286.09	124	285.085	C12H15NO7	[M+H]+	N-(beta-D-Glucosyl)nicotinate	Others	Vitamin	-	3	122600	138540	155730	144860	164150	162140	151350	101980	129160	139790	148120	138100	152200	170550	161150	140440	129260	160250	152120
pme0088	285.04	151	286.048	C15H10O6	[M-H]-	Luteolin (5,7,3',4'-Tetrahydroxyflavone)	Flavonoids	Flavonoid	491-70-3	2	5450	4390.8	6880.5	9423.5	4479.1	8290.3	3957.9	3304.2	4927.4	7139.2	9013.7	6565.2	6946	8474	3606.5	5354.4	6518.1	3215.1	6308.2
Cmsp008121	287.09	167.03	286.084	C16H14O5	[M+H]+	7-O-Methylnaringenin	Flavonoids	Flavonoid	-	3	52283	136620	929520	50975	38743	72757	55168	69361	290920	9	9	9	14452	30902	8885.9	54887	61228	60587	62369
pme1662	287.08	167	286.084	C16H14O5	[M+H]+	5,4'-Dihydroxy-7-methoxyflavanone (Sakuranetin)	Flavonoids	Flavonoid	2957-21-3	3	56010	116910	937440	54019	40455	76013	65643	73610	291660	2777.2	9	2263.7	12177	30574	10138	52097	64421	54580	64358
MWSslk132	285.21	223.21	286.214	C16H30O4	[M-H]-	Hexadecanedioic acid	Lipids	Free fatty acids	505-54-4	1	62303	68415	74068	2112400	141400	395390	125760	116890	124320	60940	61463	317140	203410	248770	234900	480220	482140	441810	488210
pme2289	287.2	119	286.23	C20H30O	[M+H]+	Retinol (Vitamin A1)	Others	Vitamin	68-26-8	3	12439	10157	9954	17668	12302	9257.4	16956	15226	16498	2740.4	3180.1	5181.9	6603.1	8947.6	13871	6885	7072.6	7493.5	8279.3
Zmyn005252	285.24	239.24	286.251	C17H34O3	[M-H]-	3-Hydroxy-palmitic acid methyl ester	Lipids	Free fatty acids	51883-36-4	3	47662	53298	51422	51965	73961	63852	76753	70623	74944	41086	41108	57460	56694	60824	66663	54896	45040	47648	53655
mws1436	287.29	97.2	286.287	C18H38O2	[M+H]+	1,18-Octadecanediol	Lipids	Free fatty acids	3155-43-9	2	6277.7	5357.4	4092.1	10339	14390	18050	13745	13026	16453	2563.5	2242	4462.9	5642.8	10052	8776.7	6933.9	6057.1	6415.1	6001.9
mws1094	287.06	259	288.063	C15H12O6	[M-H]-	Aromadendrin (Dihydrokaempferol)	Flavonoids	Dihydroflavonol	480-20-6	2	11304	6802.5	5775	9065.8	13551	11668	10805	20899	9695	6425.1	5911.6	9940.3	9520.1	7439.9	2268.5	8048.8	3709.3	5034.4	5540.2
mws0064	287.06	135	288.063	C15H12O6	[M-H]-	Eriodictyol (5,7,3',4'-Tetrahydroxyflavanone)	Flavonoids	Dihydroflavone	552-58-9	2	8845.4	6224.8	6774.2	8359.7	8339.6	5497.7	19687	11394	10925	23638	21227	14991	7253.9	12818	3243.9	5179.9	5376.8	6380.6	6007.7
Lmtp006213	289.14	135.08	288.136	C17H20O4	[M+H]+	3'-Hydroxy-3,4,5-trimethoxybibenzyl	Phenolic acids	Phenolic acids	-	3	3126.9	4048.6	2590.5	17657	17622	14285	29380	18887	13113	2846.9	1342.7	3771.5	18735	14384	10606	9341.2	10254	10676	10575
pmn001686	287.22	241.22	288.23	C16H32O4	[M-H]-	10,16-Dihydroxypalmitic acid	Lipids	Free fatty acids	3233-90-7	1	16745	18641	20404	37751	36062	41648	18331	22989	21640	19633	20928	18386	38646	35480	27474	23230	24254	25199	28104
Lmyn007883	287.22	287.22	288.23	C16H32O4	[M-H]-	9,16-Dihydroxypalmitic acid	Lipids	Free fatty acids	38076-49-2	2	403860	392990	442720	856950	823900	872200	454630	506520	482060	440350	444970	520020	748110	771520	773370	593710	594710	539420	587610
pmb3081	289	97	290.004	C6H11PO11	[M-H]-	Glucarate O-Phosphoric acid	Others	Saccharides and Alcohols	-	1	1520200	1826300	1991800	3287100	3587000	3463400	1501300	1082400	1180600	837600	864430	902470	1055800	1149300	1002000	1718800	1560600	1420500	1435900
pme3163	289	97	290.04	C7H15O10P	[M-H]-	D-Sedoheptuiose 7-phosphate	Others	Saccharides and Alcohols	2646-35-7	1	1332500	1222400	1275600	2353500	2073400	2246400	1067000	705730	1045700	624160	683440	633600	852480	989960	863850	1364400	1154800	1056300	1191800
Lmyn003835	289.04	137.02	290.043	C14H10O7	[M-H]-	4-(3,4,5-Trihydroxybenzoxy)benzoic acid	Phenolic acids	Phenolic acids	-	3	9	9	9	9	9	9	9	9	9	280270	243370	233570	9	9	9	29052	14584	17578	20759
MWSHY0065	291.09	139.04	290.079	C15H14O6	[M+H]+	Catechin	Flavonoids	Flavanols	154-23-4	1	9	9	9	9	5678.2	127380	9	9	9	2247900	2063700	2243900	9	9	9	152900	159960	165000	189670
pmb2657	289.1	97.1	290.123	C10H18N4O6	[M-H]-	Argininosuccinic acid	Organic acids	Organic acids	2387-71-5	3	61968	44428	44891	82570	32881	86692	42480	38196	46910	15134	16147	33513	38203	29281	28871	57475	52221	43887	61973
pmf0314	289.25	157	290.261	C20H34O	[M-H]-	(+)-cis-Abienol	Others	Saccharides and Alcohols	17990-16-8	3	11524	9419.9	9901.2	8239.3	9321.7	11219	13256	7807	11272	12938	10571	12478	12029	8120.9	9499.3	12479	12304	6577.4	10992
Zmyn004548	291.2	235.17	292.204	C18H28O3	[M-H]-	12-Oxo-phytodienoic acid	Lipids	Free fatty acids	85551-10-6	2	3278.6	4963	3396.9	6213.5	6010.7	5720.8	6643.1	7524.5	7923.3	3574	2391.6	2317.2	7088.6	6901.1	7884	6670.8	7849.5	6673.9	5277.2
MWSmce689	293.25	95.09	292.24	C19H32O2	[M+H]+	Methyl linolenate	Lipids	Free fatty acids	301-00-8	3	277980	325030	279610	249300	219700	291940	468360	595030	521330	178930	152200	179040	204600	347870	339630	245530	255340	270510	274560
Zmdn001564	293.11	164.07	294.122	C14H18N2O5	[M-H]-	γ-Glutamylphenylalanine	Amino acids and derivatives	Amino acids and derivatives	7432-24-8	2	21246	33793	30134	29829	21831	37426	37487	32431	55199	72027	51546	38856	24838	45027	40862	39308	36518	32556	24515
pmb2786	293.21	235.17	294.219	C18H30O3	[M-H]-	9-Hydroxy-10,12,15-octadecatrienoic acid*	Lipids	Free fatty acids	89886-42-0	2	76856	78488	70274	153620	127580	161170	229430	237140	251300	60875	58927	61358	139230	172900	147680	133200	126670	120650	128880
Lmbn005443	293.21	235.17	294.219	C18H30O3	[M-H]-	13-KODE; (9Z,11E)-13-Oxooctadeca-9,11-dienoic acid*	Lipids	Free fatty acids	54739-30-9	2	77690	76357	71900	146330	136300	160720	229470	245610	258870	57011	51749	62132	136250	170890	142450	120570	138520	117640	138230
Lmmn006306	293.21	293.21	294.219	C18H30O3	[M-H]-	Machilusolide D	Others	Others	-	2	254000	258570	305160	1076100	1008900	1043000	1693700	1651200	1631100	117130	129990	137470	884090	1136300	1024900	539740	564220	531060	557490
pmb2787	293.21	275.1	294.219	C18H30O3	[M-H]-	9-Oxo-10E,12Z-octadecadienoic acid	Lipids	Free fatty acids	54232-59-6	1	80722	62582	65630	136860	103920	181200	246730	251610	265510	51306	53535	55599	120230	158820	167430	114100	136180	112870	126170
pmb2792	293.21	193.1	294.219	C18H30O3	[M-H]-	13-Hydroxy-6,9,11-octadecatrienoic acid	Lipids	Free fatty acids	74784-20-6	2	101790	98073	111950	67123	125250	115550	136850	113300	114040	95623	112300	113870	110680	125350	124380	60914	59705	58499	68151
Zmyn004732	293.21	185.12	294.219	C18H30O3	[M-H]-	2R-hydroxy-9Z,12Z,15Z-octadecatrienoic acid	Lipids	Free fatty acids	-	3	124040	142310	147310	539450	497770	515590	847240	756320	842640	61354	72279	64505	433480	549780	529750	272150	302610	269850	280720
Zmyn004676	293.21	113.1	294.219	C18H30O3	[M-H]-	17-Hydroxylinolenic acid	Lipids	Free fatty acids	-	2	551370	507570	606820	1752200	1353700	1710200	2630000	2418800	2709300	339660	361510	377130	1675600	2108600	1734700	1129800	1226300	1045900	1153900
Zmpn003368	293.21	195.14	294.219	C18H30O3	[M-H]-	13S-Hydroxy-9Z,11E,15Z-octadecatrienoic acid	Lipids	Free fatty acids	87984-82-5	2	85288	84141	91172	160850	127300	170750	155980	135160	177320	65812	50718	59228	159460	217900	166630	155350	148550	152770	153000
Lmcn009539	293.25	293.25	294.256	C19H34O2	[M-H]-	E,E,Z-1,3,12-Nonadecatriene-5,14-diol	Lipids	Free fatty acids	-	3	61180	59692	60446	109770	98980	118190	164920	145170	147920	68128	69844	73173	74114	88195	101100	62736	66829	69882	72119
Hmqp005411	297.24	81.07	296.234	C18H32O3	[M+H]+	9-Oxo-12Z-Octadecenoic acid*	Lipids	Free fatty acids	112543-32-5	1	1346300	1282500	1250600	2616700	2505400	3269400	4539700	4376200	4389000	713120	724450	823670	2629800	2902700	2615800	1671600	1718400	1835800	1678200
Hmqp005455	297.24	81.07	296.234	C18H32O3	[M+H]+	15(R)-Hydroxylinoleic Acid*	Lipids	Free fatty acids	177931-23-6	1	1341600	1296000	1161600	2411100	2349600	2760300	4517000	4848800	4467100	733770	656080	818100	2676900	3226600	2570700	1621100	1750200	1748500	1679200
pmb2799	295.23	195.2	296.235	C18H32O3	[M-H]-	12,13-Epoxy-9-Octadecenoic Acid	Lipids	Free fatty acids	6799-85-5	1	538750	478070	531640	1650800	1373400	1645200	3043300	3102800	3443600	378820	402020	434480	1509500	1996100	1644500	1104100	1092600	986650	1092800
Lmbn005369	295.23	195.14	296.235	C18H32O3	[M-H]-	13(S)-HODE;13(S)-Hydroxyoctadeca-9Z,11E-dienoic acid*	Lipids	Free fatty acids	10219-69-9	2	2682900	2878700	2944400	12377000	11279000	11956000	18876000	19257000	18355000	2539800	2664700	2835000	10927000	12365000	11976000	7457800	7585800	7076200	7799500
Lmbn005662	295.23	171.1	296.235	C18H32O3	[M-H]-	9(10)-EpOME;(9R,10S)-(12Z)-9,10-Epoxyoctadecenoic acid	Lipids	Free fatty acids	16833-56-0	1	1901000	1747600	1945200	5765000	4939200	5720100	10742000	11097000	11921000	1607400	1633800	1858400	6076000	7311500	6390200	4280100	4354000	3787700	4299700
Rfmb091	295.23	195.14	296.235	C18H32O3	[M-H]-	9S-Hydroxy-10E,12Z-octadecadienoic acid*	Lipids	Free fatty acids	15514-85-9	1	2688100	2991600	3014000	12669000	11271000	12596000	19263000	18897000	18574000	2640400	2734900	2925900	11306000	12697000	12201000	7509000	7979100	7215300	7901000
pme1474	298.1	136	297.09	C11H15N5O3S	[M+H]+	5'-Deoxy-5'-(methylthio)adenosine	Nucleotides and derivatives	Nucleotides and derivatives	2457-80-9	1	1301300	1731800	1900800	1474900	1138200	2445300	985400	937040	1330000	1548700	1300900	1440000	1367100	1247300	1736500	1573600	1640500	1574700	1592800
pmb0197	298.1	166.3	297.107	C11H15N5O5	[M+H]+	N7-Methylguanosine	Nucleotides and derivatives	Nucleotides and derivatives	20244-86-4	3	6017.7	8688.1	8637	15024	13212	9298	14748	9783.5	19104	10142	12178	4928.3	10015	10937	3034.4	8015.1	8053.4	8357.2	12876
Lmbn009444	297.24	183.14	298.251	C18H34O3	[M-H]-	Ricinoleic acid	Lipids	Free fatty acids	141-22-0	2	476730	472790	392510	517310	493160	522180	741660	728520	700800	438890	425350	434780	504450	561640	573880	498860	478740	421900	504410
Zmgn005057	297.24	183.01	298.251	C18H34O3	[M-H]-	9,10-Epoxyoctadecanoic Acid	Lipids	Free fatty acids	2443-39-2	2	3493.5	3778.5	3494.6	5863.1	6694.2	5963.4	14935	13050	13248	1838.8	1977	2951.4	4930.4	9311.5	7446.2	6206.4	5242.5	4794.8	5645.9
pmf0297	297.32	183.1	298.324	C20H42O	[M-H]-	1-Eicosanol	Lipids	Free fatty acids	629-96-9	3	471090	459450	402670	559610	503760	520610	784420	744920	720760	453580	432830	452650	533060	598940	582250	488330	500380	442430	495050
Lmhn001386	299.04	167.03	300.048	C12H12O9	[M-H]-	Vnilloyltartaric acid	Phenolic acids	Phenolic acids	-	3	9	9	9	9	9	221660	9	9	9	9	9	9	9	9	9	395590	366070	298370	436360
Zmhp003514	301.07	286.05	300.063	C16H12O6	[M+H]+	6,7,8-Tetrahydroxy-5-methoxyflavone	Flavonoids	Flavonoid	-	3	259080	242870	245720	247700	208250	221600	166690	152060	167150	152740	146570	162710	185070	197140	155300	163810	181910	182410	202100
mws0058	299.06	284	300.063	C16H12O6	[M-H]-	Diosmetin (5,7,3'-Trihydroxy-4'-methoxyflavone)*	Flavonoids	Flavonoid	520-34-3	1	465280	458750	480790	520690	399370	429880	331220	288560	331310	293790	298510	316320	318150	408620	357400	367860	371180	325840	372070
Lmmp005689	301.07	258.05	300.063	C16H12O6	[M+H]+	Cajanin	Flavonoids	Isoflavones	32884-36-9	3	14540	15238	18476	16347	10478	14245	8090.5	9809.9	9037.6	9617.2	10230	11267	9965.7	11610	13237	14154	12474	11151	10590
pmp000001	301.07	286.05	300.063	C16H12O6	[M+H]+	Hispidulin (5,7,4'-Trihydroxy-6-methoxyflavone)*	Flavonoids	Flavonoid	1447-88-7	1	257830	255970	255160	265090	199710	230020	177470	154560	162820	154930	160910	158780	164120	201470	172690	173570	167970	186550	179830
pmp001127	301.07	286.08	300.063	C16H12O6	[M+H]+	Chrysoeriol*	Flavonoids	Flavonoid	491-71-4	2	284250	254450	287980	272890	245040	238980	188960	138250	182320	159240	144690	178040	184770	228900	191280	194690	197040	199800	221900
Lmjp004941	301.07	286.05	300.063	C16H12O6	[M+H]+	Rhamnocitrin (7-Methylkaempferol)*	Flavonoids	Flavonoid	569-92-6	2	267800	236010	274110	247360	222030	220720	164970	152250	181170	146110	149950	187510	193020	184680	174210	175920	174220	192410	179420
Zmhn001926	299.08	137.02	300.084	C13H16O8	[M-H]-	1-O-Salicyl-D-glucose	Phenolic acids	Phenolic acids	60517-74-0	1	1098600	1027100	960740	1250400	1237200	1315900	749690	700540	613410	776230	731440	744630	861810	862740	707500	823450	784030	838480	807340
pmb3142	299.1	137.1	300.085	C13H16O8	[M-H]-	Salicylic acid-2-O-glucoside	Phenolic acids	Phenolic acids	10366-91-3	3	69456	67119	67111	108140	85199	95580	83150	95873	97327	66666	71191	68000	77155	75776	57295	82175	71810	70473	73618
Hmtn001302	299.08	137.02	300.085	C13H16O8	[M-H]-	Glucosyloxybenzoic acid	Phenolic acids	Phenolic acids	-	1	493250	487110	454450	535170	486370	515670	351780	287510	257610	319890	285430	311860	388880	390860	304310	360470	399010	333230	365190
pmc1990	299.1	223.1	300.1	C17H16O5	[M-H]-	4'-Hydroxy-5,7-dimethoxyflavanone	Flavonoids	Flavanols	-	3	6361200	7352900	7266400	6819500	7245800	6693000	7163900	8699000	6324400	11564000	11356000	11134000	11187000	10250000	8752300	4365700	5103600	4985300	6128000
Cmmn012461	299.2	299.2	300.209	C20H28O2	[M-H]-	Dehydroabietic acid	Terpenoids	Ditepenoids	1740-19-8	2	356610	436530	314120	414000	377670	372990	684800	473970	525150	297600	279490	292690	349590	445330	431410	405900	368570	338140	361450
MWS4295	299.26	253.25	300.266	C18H36O3	[M-H]-	DL-2-hydroxystearic acid	Lipids	Free fatty acids	629-22-1	2	158680	199440	177150	565470	589620	490840	631100	593070	618410	238080	246930	261460	279710	316800	349010	290620	263810	252280	263880
MWS5235	299.26	253.25	300.266	C18H36O3	[M-H]-	12-Hydroxyoctadecanoic acid	Lipids	Free fatty acids	106-14-9	2	12516	10234	15467	21927	30501	25514	20086	22228	17822	22159	24805	22518	27454	27806	26922	21116	21274	20906	22880
Zmyn005384	299.26	253.26	300.266	C18H36O3	[M-H]-	2R-Hydroxyoctadecanoic Acid	Lipids	Free fatty acids	26633-48-7	2	155160	208470	180190	530430	565000	539710	662140	569420	681310	242640	250620	263940	264820	333220	340520	292710	276550	257330	279920
Lmqn008288	299.26	299.26	300.267	C18H36O3	[M-H]-	3-Hydroxyoctadecanoic Acid	Lipids	Free fatty acids	45261-96-9	2	373270	446390	337970	399220	375160	347520	659170	478440	513940	286410	273670	298280	389570	404920	428000	381910	370560	322320	343020
pmb3079	300.05	96.9	301.056	C8H16NO9P	[M-H]-	N-Acetyl-D-glucosamine-1-phosphate	Others	Saccharides and Alcohols	6866-69-9	2	33316	57984	28563	31072	42647	25090	42520	38371	86446	53406	34126	41024	53847	45749	61016	49596	32265	49248	45057
Hmqn000843	301.09	123.01	302.1	C13H18O8	[M-H]-	Tachioside	Lignans and Coumarins	Lignans	109194-60-7	2	34576	27378	24018	44600	31766	38315	8578.3	15072	12545	11728	10074	2899.6	21673	15286	16425	17635	17058	17283	20487
Cmcp008329	303.23	257.23	302.224	C20H30O2	[M+H]+	Sandaracopimaric acid	Terpenoids	Ditepenoids	471-74-9	3	30086	23795	30992	39387	31369	28983	35415	24986	30281	12843	7649.8	8143.1	19655	17749	16471	12551	13788	21858	19601
Cmmn013275	301.22	301.22	302.225	C20H30O2	[M-H]-	Isopimaric acid	Terpenoids	Ditepenoids	5835-26-7	2	10285000	8186600	9494300	10850000	10293000	8687200	15692000	14004000	17477000	4354000	4012000	3864700	7789600	11307000	11481000	7722600	8000300	7259100	7687600
Cmmn012997	301.22	301.22	302.225	C20H30O2	[M-H]-	Abietic acid	Terpenoids	Ditepenoids	514-10-3	2	11025000	8259300	9429600	11193000	10028000	8773300	15837000	13711000	16563000	4434500	3945000	3756200	7674700	11287000	11186000	7621500	7986100	7231700	7436300
mws0397	301.22	257.23	302.225	C20H30O2	[M-H]-	Cis-5,8,11,14,17-Eicosapentaenoic Acid	Lipids	Free fatty acids	10417-94-4	1	9	9	9	9	9	4499.7	9	9	9	9	9	9	9	9	9	5740.8	7221.9	6605.8	7800.7
MWSmce549	303.25	57.07	302.246	C17H34O4	[M+H]+	1-Monomyristin	Lipids	Free fatty acids	589-68-4	1	1797400	1760000	1839400	1688800	1870300	1693200	1594500	1805000	2078600	1673600	1725000	1758500	1519100	1302800	1523100	1298000	1378900	1677700	1583100
mws1375	304.15	185.09	303.143	C12H21N3O6	[M+H]+	Nicotianamine	Amino acids and derivatives	Amino acids and derivatives	34441-14-0	2	1031500	1088200	1011900	1195600	1283800	1128200	864560	971860	1012700	813170	719620	852620	1289200	1219500	1058900	1047300	1235400	1241400	1344200
mws0044	303.05	125.02	304.058	C15H12O7	[M-H]-	Dihydroquercetin(Taxifolin)	Flavonoids	Dihydroflavonol	480-18-2	2	6399.5	9254	6989.5	5740	4046.8	6373.2	2899.2	5483.2	8648.2	9	9	9	8640.2	6603	9246.2	11554	7660	10584	16128
mws0369	303.23	258.9	304.24	C20H32O2	[M-H]-	Arachidonic Acid	Lipids	Free fatty acids	506-32-1	2	3815.3	1548.1	6584.4	9798.3	9404.7	8861.9	15716	7379.2	13329	3986.5	3293.8	2646.3	5017.2	7818	5197.2	5633.3	4804.5	4395	5641.8
pme1086	306.08	143	307.084	C10H17N3O6S	[M-H]-	Glutathione reduced form	Amino acids and derivatives	Amino acids and derivatives	70-18-8	1	607680	819220	797750	173820	237200	154400	444740	570830	348170	309470	308960	270070	133950	167300	244550	161660	107940	123610	112710
pmb2855	307	145	308.122	C11H20N2O8	[M-H]-	L-Glutamine-O-glycoside	Amino acids and derivatives	Amino acids and derivatives	-	3	85168	110870	86209	178180	34055	320650	92911	39420	198430	17950	18420	81577	88203	49105	151790	64081	67063	53615	69056
pmn001610	307.26	307.3	308.272	C20H36O2	[M-H]-	Eicosadienoic acid	Lipids	Free fatty acids	5598-38-9	1	1080400	1706700	1224000	1910800	1866600	1864000	4009800	2997800	3514900	943340	1058800	1102800	1425900	1924400	2085300	1357200	1582100	1453700	1443000
pmb2857	308.1	146.1	309.106	C11H19NO9	[M-H]-	L-Glutamic acid-O-glycoside	Amino acids and derivatives	Amino acids and derivatives	-	3	123890	221600	142700	314320	147070	421810	290810	119100	353310	98032	105420	89397	215610	261830	361550	166890	156350	195340	184870
pmb2791	309.21	209.1	310.1	C18H30O4	[M-H]-	9-Hydroperoxy-10E,12,15Z-octadecatrienoic acid	Lipids	Free fatty acids	111004-08-1	3	33150	42424	36444	41148	60251	44607	63754	43828	50811	38870	45394	47176	52611	46834	47233	30003	33663	26643	30632
Zmdp001857	311.12	165.05	310.116	C14H18N2O6	[M+H]+	γ-Glutamyltyrosine	Amino acids and derivatives	Amino acids and derivatives	7432-23-7	3	26526	21786	23663	48016	19587	43248	30210	20828	46877	17867	25261	24126	26328	30152	25969	22106	18047	17986	23883
pmp001214	310.16	251.09	310.147	C16H24NO5+	[M]+	Sinapine	Alkaloids	Alkaloids	18696-26-9	2	7226	9	7197.2	118390	94826	99278	156460	144800	139200	5754	5304	2887.8	52214	47839	48601	42401	35215	34152	31845
Zmzn003953	309.2	227.2	310.214	C18H30O4	[M-H]-	13(s)-hydroperoxy-(9z,11e,15z)-octadecatrienoic acid	Lipids	Free fatty acids	67597-26-6	1	1796900	1985200	1674700	2981900	3263300	3190900	3710700	3160700	3540800	1438500	1644500	1951200	2406200	2976800	2756800	3607300	3384600	2631800	3164000
Zmyn004449	309.21	171.1	310.214	C18H30O4	[M-H]-	9-Hydroxy-12-oxo-10(E),15(Z)-octadecadienoic acid	Lipids	Free fatty acids	-	2	17102	17818	20214	30511	23131	26248	45849	43546	53729	8953.8	9544.3	10299	24890	34489	28186	17977	18057	17689	17673
Hmqp006221	311.26	279.32	310.25	C19H34O3	[M+H]+	13-Hydroxy-9Z,11E-octadecadienoic acid	Lipids	Free fatty acids	18104-45-5	3	16086	16904	15845	10355	10142	17235	26892	28375	34604	8572.2	9036.3	7758.3	7236.1	11695	16601	12253	11952	12082	13104
pmn001606	309.28	309.28	310.287	C20H38O2	[M-H]-	Eicosenoic acid	Lipids	Free fatty acids	26764-41-0	1	10090000	7079500	9357700	9595300	12819000	12166000	13905000	26798000	22894000	29193000	6608600	6922700	8825100	9789300	15395000	99484	141160	172190	267550
Lmap001823	312.11	132.04	311.101	C14H17NO7	[M+H]+	Dhurrin	Alkaloids	Phenolamine	499-20-7	3	15992	13096	20404	34720	82115	76647	69554	75813	84761	9	9	9	42124	42824	49281	33250	23350	30214	30581
Lmcp002302	312.13	180.09	311.123	C12H17N5O5	[M+H]+	N6-(2-Hydroxyethyl)adenosine	Nucleotides and derivatives	Nucleotides and derivatives	4338-48-1	3	185220	238580	221310	273560	130250	353030	216500	120680	221700	73857	71829	120950	149690	222240	192160	203890	212720	224510	224880
pme3967	312.13	180	311.123	C12H17N5O5	[M+H]+	2-(Dimethylamino)guanosine	Nucleotides and derivatives	Nucleotides and derivatives	2140-67-2	2	185220	223730	244220	284300	132170	378170	219630	124200	222690	87294	71751	122230	121810	210760	161530	211260	226490	238470	254080
Lmqp002761	313.14	151.08	312.136	C19H20O4	[M+H]+	Alnusonol	Phenolic acids	Phenolic acids	52330-12-8	2	38185	37352	39857	73022	66857	71961	52510	35247	38362	27759	39145	42612	44478	27611	39977	47101	44291	41735	50679
MWS80006	311.22	293.21	312.23	C18H32O4	[M-H]-	9-Hydroperoxy-9Z,11E-Octadecadienoic Acid	Lipids	Free fatty acids	5502-91-0	2	22986	25860	20778	40915	35594	42704	105500	101110	102440	27902	24307	20889	43345	46047	41763	29288	28722	24869	26433
pmb2804	311.1	171.3	312.23	C18H32O4	[M-H]-	13S-Hydroperoxy-9Z,11E-octadecadienoic acid	Lipids	Free fatty acids	33964-75-9	3	108260	118640	150630	225440	213520	202720	334600	348560	354700	51121	51290	51060	209610	275240	238860	143280	147570	134160	147010
Rfmb087	311.22	293.21	312.23	C18H32O4	[M-H]-	9-Hydroxy-13-oxo-10-octadecenoic Acid	Lipids	Free fatty acids	-	3	86009	93599	81896	228040	210230	204620	425360	474010	492860	117940	108100	123330	270710	266350	268380	199460	177410	163540	184060
pmn001689	311.22	223.17	312.23	C18H32O4	[M-H]-	9-Hydroxy-12-oxo-15(Z)-octadecenoic acid	Lipids	Free fatty acids	-	1	127930	128180	111280	446020	335890	424530	371260	389430	458050	87058	81341	93687	337890	422720	367850	268210	281090	250110	262720
Lmbn004685	311.22	223.17	312.23	C18H32O4	[M-H]-	5S,8R-DiHODE; (5S,8R,9Z,12Z)-5,8-Dihydroxyoctadeca-9,12-dienoate	Lipids	Free fatty acids	-	1	19542	24018	24264	21811	24469	31128	30219	26453	23508	23554	24383	23456	29730	23977	25771	18508	17695	15509	16058
Lmbn005287	311.22	249.22	312.23	C18H32O4	[M-H]-	7S,8S-DiHODE; (9Z,12Z)-(7S,8S)-Dihydroxyoctadeca-9,12-dienoic acid	Lipids	Free fatty acids	143288-65-7	2	90986	82744	109050	1148500	252500	276780	210350	226830	266110	140290	143270	166520	514510	728390	627450	378800	389110	362180	396910
pmf0397	311.3	183.1	312.303	C20H40O2	[M-H]-	Arachidic acid	Lipids	Free fatty acids	506-30-9	3	60398	71996	65028	100260	102230	135230	168680	115990	133370	81163	80969	94927	57336	85137	50041	101260	94786	67645	66274
mws1433	314.14	177.05	313.131	C18H19NO4	[M+H]+	N-Feruloyltyramine	Alkaloids	Phenolamine	66648-43-9	2	6201.5	7524.1	90245	3128.8	2890.5	16958	18736	5008.8	40225	17828	18955	21837	14624	51843	25275	17723	18954	19325	16068
MWStz221	314.14	177.06	313.131	C18H19NO4	[M+H]+	N-Cis-Feruloyltyramine	Alkaloids	Phenolamine	80510-09-4	2	8122.4	8648.6	90695	2424.6	3221.3	24098	19492	5982.2	44257	23031	18615	21328	24098	55803	21012	18675	15072	18691	13927
mws0038	313.07	283	314.079	C17H14O6	[M-H]-	Kumatakenin	Flavonoids	Flavonols	3301-49-3	2	16386	15763	24237	15630	12212	18451	26547	21473	45424	4522.7	4643.5	6114	10329	16409	12277	9202.4	11894	10260	10501
Lmmn002179	313.09	107.05	314.1	C14H18O8	[M-H]-	Methyl salicylate-2-O-glucoside	Phenolic acids	Phenolic acids	10019-60-0	2	7537.3	8641.5	6474.9	6055.8	5739.8	7108	6067	4125.1	5895.2	4950.2	780.36	1965.9	3760.5	4689	5076.4	3112.1	6092	2937.8	6284.3
Lmbn007891	313.24	183.14	314.246	C18H34O4	[M-H]-	Hydroxy ricinoleic acid	Lipids	Free fatty acids	-	2	673370	586800	497250	1566700	1420500	1515300	2813800	2986400	3018400	706340	687540	739930	1879200	2328400	2085700	1354700	1391900	1302100	1373000
Lmbn005487	313.24	251.24	314.246	C18H34O4	[M-H]-	12,13-DHOME; (9Z)-12,13-Dihydroxyoctadec-9-enoic acid	Lipids	Free fatty acids	263399-35-5	2	28962	34968	27830	103170	49185	57627	56527	57127	57761	51204	46278	58291	81149	85884	86247	68810	71265	62347	63402
MWSmce539	315.25	185.12	314.246	C18H34O4	[M+H]+	Dibutyl sebacate	Lipids	Free fatty acids	109-43-3	3	13837	12021	12079	11613	10124	11321	9688.6	9910.9	11452	10202	11651	8659.8	12347	9184.9	12125	11525	11765	9564.8	10162
pmp000003	317.07	302.04	316.058	C16H12O7	[M+H]+	Nepetin (5,7,3',4'-Tetrahydroxy-6-methoxyflavone)	Flavonoids	Flavonoid	520-11-6	2	19085	24217	14521	54477	40178	43671	28712	24079	14539	124130	113190	106130	31990	21380	15290	23839	17956	20532	19505
pmb2871	315.07	153	316.079	C13H16O9	[M-H]-	1-O-Gentisoyl-D-glucoside	Phenolic acids	Phenolic acids	23445-11-6	2	29527	22640	19787	43995	32274	63263	29489	10747	27915	22055	22945	21683	31845	35990	29532	28643	21804	17815	22036
Lmsp009013	317.1	197.05	316.095	C17H16O6	[M+H]+	4',6-Dihydroxy-5,7-dimethoxyflavanone	Flavonoids	Dihydroflavone	6951-57-1	3	76901	73058	75817	77831	58378	86046	70800	84909	75804	48641	39415	39019	35031	57051	49008	34696	41180	35049	47924
pmf0392	317.1	167.04	316.095	C17H16O6	[M+H]+	Persicogenin (5,3'-dihydroxy-7,4'-dimethoxyflavanone)	Flavonoids	Dihydroflavone	28590-40-1	2	74081	89822	76747	63935	50423	63302	141340	117420	132150	35173	44830	43544	72216	124740	92531	57303	68375	61894	65732
pme3459	317.21	299	316.204	C20H28O3	[M+H]+	Cafestol	Terpenoids	Ditepenoids	469-83-0	2	2916200	2109900	3179500	6117200	4478500	5268200	5426700	5355200	5836300	3532900	3295000	3629200	5488800	5138900	3266500	2991500	3136500	3349800	3819300
MWSslk125	317.14	59.01	318.147	C18H22O5	[M-H]-	Zearalenone	Others	Others	17924-92-4	3	31825	23797	23570	40550	39482	37342	33320	33845	45574	3352.8	7182.8	9475	23935	28831	27682	20387	23153	18205	20721
pmp000970	319.23	301.2	318.219	C20H30O3	[M+H]+	Hispanolone	Terpenoids	Ditepenoids	18676-07-8	2	149290	255350	283120	626860	681500	877960	1040500	1027700	1185100	180690	205690	199230	697400	675140	692940	487090	476750	478150	563910
Hmqp005412	319.22	319.22	318.22	C20H30O3	[M+H]+	12-Hydroxyabietic Acid	Terpenoids	Ditepenoids	3484-61-5	3	110460	105650	95480	134330	119390	124930	223460	219030	202110	43204	46181	45187	152400	189490	154340	79960	81198	90272	104520
mws0582	322.11	130	321.099	C11H19N3O6S	[M+H]+	S-(Methyl)glutathione	Amino acids and derivatives	Amino acids and derivatives	2922-56-7	2	140000	107820	107960	326520	217040	295500	109190	108470	127930	13852	19772	22247	79720	72453	79908	70343	68050	61167	93372
MWSslk257	324.06	112.05	323.052	C9H14N3O8P	[M+H]+	Cytidine 5'-monophosphate(Cytidylic acid)	Nucleotides and derivatives	Nucleotides and derivatives	63-37-6	3	24142	47887	25032	15166	19604	26352	24006	21073	34447	30338	24395	34025	19494	5356.2	13240	13268	22318	23377	26752
pme2074	322.4	129.7	323.21	C18H29NO4	[M-H]-	(-)-Jasmonoyl-L-Isoleucine	Organic acids	Organic acids	120330-93-0	3	1827.4	3570	4342.1	2559.9	1618.3	2367.1	3725.6	2316.7	3924.9	4917.2	1914.1	2812	5068.8	10216	8558.8	6837	7000.4	5236.3	7291.2
pme3188	323.03	211	324.036	C9H13N2O9P	[M-H]-	Uridine 5'-monophosphate	Nucleotides and derivatives	Nucleotides and derivatives	58-97-9	2	26370	21240	19257	5556.9	4142.1	2277.5	7188.8	5396.5	16828	50559	36822	46128	6755.2	7755.6	7452.7	11549	7342.4	16735	9731.4
Hmqp006023	326.27	309.27	324.266	C20H36O3	[M+H]+	Ethyl 9-Hydroxy-10,12-octadecadienoic acid	Lipids	Free fatty acids	-	2	100930	105740	96037	199950	198670	214850	249780	252440	248390	92223	90456	101060	167210	200540	188130	140340	157680	156810	159090
mws0983	326.31	62.06	325.298	C20H39NO2	[M+H]+	N-Oleoylethanolamine	Alkaloids	Alkaloids	111-58-0	1	773660	806250	725840	1556300	1608000	1676100	1955600	1928900	1995400	674670	743750	761430	1299000	1551600	1462000	1101800	1162200	1232900	1222800
Lmsn003111	325.09	145.03	326.1	C15H18O8	[M-H]-	1-O-p-Coumaroyl-β-D-glucose	Phenolic acids	Phenolic acids	7139-64-2	3	27958	15868	12940	15941	22439	28847	3722.8	6922.4	3736.7	15741	9480.2	5245.7	13419	10438	4973.2	18440	10207	11001	13181
Zmzn001549	325.09	119.05	326.1	C15H18O8	[M-H]-	Ferulic acid-1-O-glucoside	Phenolic acids	Phenolic acids	14364-05-7	2	29437	26026	31896	21513	29784	15763	17158	16064	14552	17106	23946	10506	32729	15141	15086	13944	21647	25805	16655
Hmhn003067	325.09	119.05	326.1	C15H18O8	[M-H]-	Phenylpropionic acid-O-β-D-glucopyranoside	Phenolic acids	Phenolic acids	-	2	26229	12635	24250	17275	7809.9	8558.9	8711.3	8991.2	12963	11452	12820	7449.7	20506	16716	16936	19530	28189	13656	16881
pmn001419	325.09	163.04	326.1	C15H18O8	[M-H]-	1-O-[(E)-p-Cumaroyl]-D-glucose	Phenolic acids	Phenolic acids	-	2	73603	72765	79922	60950	42649	55418	48178	43722	41166	59607	70015	54677	56666	47430	44604	49312	52053	72960	54326
MWSmce195	327.15	188.08	326.152	C20H22O4	[M+H]+	Dehydrodiisoeugenol	Lignans and Coumarins	Lignans	2680-81-1	3	41238	22781	30270	26223	27625	22841	36121	32588	44107	12267	14909	11959	16259	23713	20596	15814	14532	14287	13838
Smcp000882	328.13	310.12	327.132	C15H21NO7	[M+H]+	N-benzoyl-2-aminoethyl-β-D-glucopyranoside	Others	Others	-	3	41706	188330	38657	649360	121850	679800	224350	37096	408040	9	9	41336	33467	122260	339360	79970	92317	85513	98746
pmn001691	327.22	291.2	328.225	C18H32O5	[M-H]-	9,12,13-Trihydroxy-10,15-octadecadienoic acid	Lipids	Free fatty acids	-	1	29821	35533	24229	47095	31042	40742	51509	40187	62142	32637	26825	24635	74012	92029	88621	69436	60672	52748	75030
mws0371	327.23	283.3	328.24	C22H32O2	[M-H]-	Cis-4,7,10,13,16,19-Docosahexaenoic Acid	Lipids	Free fatty acids	6217-54-5	2	8202.4	7290.6	7861	9834.7	14085	13240	14732	12878	11662	7368.9	10140	7944.2	11822	7358.5	8201.1	11737	9473.7	8143	10342
mws0884	328.05	134.2	329.053	C10H12N5O6P	[M-H]-	Cyclic 3',5'-Adenylic acid	Nucleotides and derivatives	Nucleotides and derivatives	60-92-4	2	67939	63958	57385	102560	107950	104020	102260	90698	111350	34673	35793	47316	74599	69137	79217	68195	67521	68522	67040
Zmlp005013	331.04	299.02	330.038	C16H10O8	[M+H]+	3,3'-O-Dimethylellagic Acid	Tannins	Tannin	2239-88-5	3	44282	29487	26034	40746	29798	28409	36140	27118	35807	37936	42492	43125	29269	44943	34586	33399	28127	32941	30843
Lmzp004885	331.08	315.05	330.074	C17H14O7	[M+H]+	Tricin (5,7,4'-Trihydroxy-3',5'-dimethoxyflavone)	Flavonoids	Flavonoid	520-32-1	3	2795000	2325300	2046400	3549300	2527000	2734400	2749400	2245000	2789700	3429100	3239800	3661900	2749800	3191500	2662800	2435600	2589500	2529100	2674000
Lmjp005016	331.08	298.05	330.074	C17H14O7	[M+H]+	Cirsiliol (3',4',5-Trihydroxy-6,7-Dimethoxyflavone)	Flavonoids	Flavonoid	34334-69-5	3	67649	56510	52500	90781	69416	67214	72268	59668	71885	86898	85829	88389	66954	84880	71793	64291	69777	62472	68685
Lmcp004369	331.08	287.05	330.074	C17H14O7	[M+H]+	Quercetin-3',4'-dimethyl ether	Flavonoids	Flavonols	3306-29-4	1	8114.2	9177.2	8472.8	12721	9214.5	22670	11988	12033	17104	12691	4646.5	5608.5	22322	16280	11347	17039	14156	12750	19719
pmp000004	331.08	316.06	330.074	C17H14O7	[M+H]+	4',5,7-Trihydroxy-3',6-dimethoxyflavone (Jaceosidin)	Flavonoids	Flavonoid	18085-97-7	1	1362500	1164300	993740	1787100	1265900	1389700	1350200	1139600	1372800	1815300	1625400	1762700	1371400	1545000	1332000	1172300	1278900	1258500	1314200
Smhn002346	329.08	167.03	330.095	C14H18O9	[M-H]-	2,4,6-trihydroxy-acetophenone-6-O-β-D-glucopyranoside	Phenolic acids	Phenolic acids	-	1	82063	83945	81171	113670	114070	104430	88134	101870	105020	70686	71536	63965	81407	84139	80906	80388	98347	77107	79302
Smhn102346	329.08	167.03	330.095	C14H18O9	[M-H]-	2,4,6-trihydroxy-acetophenone-4-O-β-D-glucopyranoside	Phenolic acids	Phenolic acids	-	1	85135	81134	79107	103840	97547	121970	89352	100820	101990	68947	68091	59119	67728	68955	67045	80927	75272	57220	84708
Zmhn001883	329.09	209.04	330.095	C14H18O9	[M-H]-	Vanillic acid-4-O-glucoside	Phenolic acids	Phenolic acids	32142-31-7	3	54966	42897	32201	53223	50703	48902	5745.6	15752	10344	9869.8	7112.4	5144.7	28892	21739	22257	23461	28394	25143	19546
Lmzp003012	331.12	313.11	330.11	C18H18O6	[M+H]+	3-Hydroxy-4',5,7-Trimethoxyflavanone	Flavonoids	Flavonoid	76792-94-4	2	211000	319100	116450	66005	44455	68541	210790	157950	201760	120460	124940	122730	87370	111280	230360	76339	85060	98463	105460
pmn001517	329.12	167	330.131	C15H22O8	[M-H]-	3,4,5-Trimethoxyphenyl-1-O-Glucoside	Phenolic acids	Phenolic acids	-	2	194390	171260	169760	237840	207740	231120	196240	242490	224940	150230	121700	135710	157630	159270	156850	161800	165400	143480	164480
Hmqn003054	329.23	311.23	330.24	C18H34O5	[M-H]-	9,10,11-Trihydroxy-12-octadecenoic acid	Lipids	Free fatty acids	61911-67-9	1	102220	117200	130480	352390	326090	341380	545140	548450	594580	129390	113070	121930	418910	478060	433040	290860	284930	288280	299800
Lmbn004240	329.23	199.13	330.241	C18H34O5	[M-H]-	9,10-Dihydroxy-12,13-epoxyoctadecanoic acid	Lipids	Free fatty acids	-	2	47929	35123	33990	50915	45919	48407	56884	57428	62209	28693	22816	27910	68763	90503	68004	66615	75863	57391	56298
pmn001694	329.23	229.15	330.241	C18H34O5	[M-H]-	9,10,13-Trihydroxy-11-Octadecenoic Acid	Lipids	Free fatty acids	29907-57-1	1	1360900	1461600	1446500	3852000	3471400	3768600	6348200	6174300	6727600	1617300	1537600	1609800	4672400	5441900	4966300	3431200	3499900	3370400	3439800
Lmbn003970	329.23	211.14	330.241	C18H34O5	[M-H]-	9,12,13-TriHOME; 9(S),12(S),13(S)-Trihydroxy-10(E)-octadecenoic acid	Lipids	Free fatty acids	97134-11-7	1	26045	30218	26935	73911	67148	67719	119670	100720	132530	32855	32762	35491	86887	117660	104200	78117	70043	66020	64790
pmp001284	331.28	313.27	330.277	C19H38O4	[M+H]+	Monopalmitin	Lipids	Glycerol ester	542-44-9	1	695880	725960	757820	757450	684060	660340	676930	727820	846350	615390	753880	861320	583800	726790	659150	579250	694760	666900	668400
pme3184	332.08	136	331.068	C10H14N5O6P	[M+H]+	2'-Deoxyadenosine-5'-monophosphate	Nucleotides and derivatives	Nucleotides and derivatives	653-63-4	2	51868	45897	35785	31634	50672	38336	40368	42287	43553	33696	32009	29485	47898	44278	40126	31778	29745	37725	46939
pmb0789	332.13	152.07	331.127	C14H21NO8	[M+H]+	Pyridoxine-5'-O-glucoside	Others	Vitamin	-	2	86275	78829	83989	76038	71550	70738	97326	77534	116700	75538	85644	75797	58487	72782	72310	56689	71835	61917	52325
pmc0066	333.05	137.05	332.052	C10H13N4O7P	[M+H]+	2'-Deoxyinosine-5'-monophosphate	Nucleotides and derivatives	Nucleotides and derivatives	3393-18-8	3	19991000	18617000	18143000	20899000	19267000	18733000	22047000	21686000	23265000	18889000	20306000	19848000	22437000	24160000	21706000	19761000	21517000	21618000	22776000
pmn001518	331.07	169.01	332.074	C13H16O10	[M-H]-	1-O-Galloyl-D-glucose	Tannins	Tannin	58511-73-2	2	22817	19322	22433	22114	16822	20666	21216	19793	27354	21894	26824	28649	20520	22594	27381	34108	31873	26561	25229
Lmsp008443	333.1	167.03	332.09	C17H16O7	[M+H]+	3,3',5-Trihydroxy-4',7-dimethoxyflavanone	Flavonoids	Dihydroflavone	-	3	41960	16628	34614	72506	47575	36986	22890	26205	25665	25566	28725	24872	55844	39733	33843	24390	34380	41544	38752
Jmwn002117	331.1	153.02	332.111	C14H20O9	[M-H]-	2-(3,4-dihydroxyphenyl)ethanediol 1-O-β-D-glucopyranoside	Phenolic acids	Phenolic acids	-	3	69094	67005	57228	63561	47945	73335	19134	22966	30659	15005	16936	13570	45455	24300	35743	52520	37703	28280	38262
Lmmn001294	331.1	153.02	332.111	C14H20O9	[M-H]-	Koaburaside	Phenolic acids	Phenolic acids	41653-73-0	3	51638	60530	62820	68653	46887	69907	20320	24973	21169	19822	16521	21689	37901	34973	29048	47175	35873	38448	40785
Cmcp007926	333.21	287.2	332.199	C20H28O4	[M+H]+	Pinusolidic acid	Terpenoids	Ditepenoids	40433-82-7	3	53929	61580	85040	72675	62574	79977	114120	87228	109200	39431	38134	40577	39724	76986	90061	32206	39030	37261	39782
Lmyn007622	331.25	157.12	332.256	C18H36O5	[M-H]-	9,10,18-Trihydroxystearic acid	Lipids	Free fatty acids	496-86-6	2	2999.7	2628.6	3674.8	10634	9220.1	10544	2900	2817.1	5260.5	6825.8	5332.1	9324.3	11004	11906	10977	6324.4	8882.9	5271.1	7614.4
mws0675	335.06	123	334.057	C11H15N2O8P	[M+H]+	β-Nicotinamide mononucleotide	Nucleotides and derivatives	Nucleotides and derivatives	1094-61-7	2	15726	18041	7831.5	8582.8	16844	8071.8	17354	14336	22580	13295	5609.2	19574	10642	21542	12874	7843	5481.8	13817	16972
Lmqn000432	333.06	333.06	334.067	C9H19O11P	[M-H]-	1-(sn-Glycero-3-phospho)-1D-myo-inositol	Others	Saccharides and Alcohols	-	1	727270	933440	869930	774680	692400	770500	678230	795360	767970	636370	546110	503180	585440	589630	719400	460330	537280	566870	564840
MWS20033	333.21	289.22	334.214	C20H30O4	[M-H]-	20-Carboxyarachidonic Acid	Lipids	Free fatty acids	79551-84-1	2	72499	45596	49986	50540	55239	51782	88875	76763	78270	21517	15072	14796	31054	50634	71107	34090	36953	24557	35793
pmf0289	336.17	148	335.159	C15H21N5O4	[M+H]+	Riboprine	Nucleotides and derivatives	Nucleotides and derivatives	7724-76-7	3	26905	21152	36354	41990	15661	16162	42827	29570	26594	31930	31678	12833	22955	21639	26870	16740	21397	30785	20749
MWStz294	337.15	177.05	336.147	C20H20N2O3	[M+H]+	N-Feruloyltryptamine	Alkaloids	Plumerane	53905-13-8	3	14234	65829	27532	9033.5	15272	7422.1	14938	11265	23214	38479	44980	41687	13090	18827	16461	22307	18550	21832	26124
pmb0498	337.19	207.07	336.18	C16H24N4O4	[M+H]+	Sinapoylagmatine	Alkaloids	Phenolamine	-	2	13274	15447	7691.8	9784.2	15765	17766	16100	13670	9645.5	14916	14378	12012	18288	10787	16443	6302.5	6303.5	12163	7748.6
pmb0382	339.09	177.2	338.079	C19H14O6	[M+H]+	O-Feruloyl 4-hydroxycoumarin	Lignans and Coumarins	Coumarins	-	1	106360	55520	56682	125240	150230	82208	47428	161320	85963	164170	187940	201890	154840	129250	111780	97675	82763	118760	102850
pme3311	339	97	339.996	C6H14O12P2	[M-H]-	D-Fructose-1,6-biphosphate	Others	Saccharides and Alcohols	488-69-7	3	32799	59871	66381	80432	64772	39689	53899	65231	52664	70008	40451	54248	56272	55985	62725	70962	90838	61854	53903
pma0149	341.08	207.07	340.079	C15H16O9	[M+H]+	Sinapoyl malate	Phenolic acids	Phenolic acids	92344-58-6	3	11224	14088	10157	14740	8671.6	14937	13685	8303.4	9515.6	28831	28920	19513	10083	13681	15793	20365	15615	13358	14869
Xmgp006913	341.14	137.06	340.131	C20H20O5	[M+H]+	2,4,2',4'-tetrahydroxy-3'-prenylchalcone	Flavonoids	Chalcones	-	3	525100	431930	447810	955600	805860	919440	282520	274780	322220	392830	395410	369140	1035600	1215400	979230	973770	1094300	1052900	1181500
pmf0400	339.33	183.2	340.334	C22H44O2	[M-H]-	Docosanoic acid (Behenic acid)	Lipids	Free fatty acids	112-85-6	3	30371	38768	39601	73130	50763	79630	85869	90010	75281	51152	49791	36194	80575	48850	83666	65388	44087	32795	35667
Zmhn001793	341.09	179.03	342.096	C15H18O9	[M-H]-	6-O-Caffeoyl-D-glucose	Phenolic acids	Phenolic acids	-	2	30104	41188	34231	80425	65576	58738	50840	36744	76051	10213	20573	25593	31853	29232	38024	25471	35002	26420	31070
Lmcp004714	343.12	137.06	342.11	C19H18O6	[M+H]+	6-Hydroxy-7-Methoxy-2-[2-(3'-Hydroxy-4'-Methoxyphenyl)Ethyl]Chromone	Others	Others	-	2	13855	12189	12717	21565	31746	23526	17233	14297	12271	21527	14288	13054	21244	19483	16632	17980	16220	19800	16813
MWSmce203	341.12	73.03	342.116	C12H22O11	[M-H]-	D-(+)-Cellobiose	Others	Saccharides and Alcohols	528-50-7	3	220370	204140	143740	345550	211900	296370	135270	131900	200230	141380	115820	96265	113320	134310	137790	117840	159250	124560	151690
mws1080	341.11	179	342.116	C12H22O11	[M-H]-	Galactinol	Others	Saccharides and Alcohols	3687-64-7	1	26501000	20918000	21060000	20026000	19899000	19914000	17264000	16930000	16612000	18085000	23253000	18301000	15816000	19354000	20123000	16724000	18520000	18285000	15269000
mws1333	341.11	113	342.116	C12H22O11	[M-H]-	Melibiose	Others	Saccharides and Alcohols	585-99-9	1	4842900	3665600	3511000	3899900	5239600	4501800	4523000	3431600	2769900	2857000	4782900	3709300	3474600	3833600	3722700	3024700	3531900	3454400	3287000
mws5038	341.11	89.02	342.116	C12H22O11	[M-H]-	Isomaltulose*	Others	Saccharides and Alcohols	13718-94-0	1	21478000	18070000	16310000	15672000	16318000	19071000	16244000	13302000	14628000	14872000	19487000	16261000	15336000	16491000	15881000	15315000	14962000	15675000	14360000
MA10039641	341.11	89.02	342.116	C12H22O11	[M-H]-	Lactobiose	Others	Saccharides and Alcohols	63-42-3	1	14285000	9963400	13332000	9822600	12119000	11659000	13371000	10959000	8993500	11333000	11964000	13753000	9265100	12387000	15501000	11079000	10168000	10270000	8660300
Lmsn000381	341.11	89.02	342.116	C12H22O11	[M-H]-	D-Maltose*	Others	Saccharides and Alcohols	133-99-3	1	16554000	9575500	8998600	9781400	7712700	10629000	9459400	10540000	8170900	7108300	7984100	9864900	7755000	11575000	12351000	9503900	8960100	8623100	5843200
pme0519	341.11	119.03	342.116	C12H22O11	[M-H]-	D-Sucrose*	Others	Saccharides and Alcohols	57-50-1	1	14484000	12886000	11012000	11498000	12585000	9966200	8483600	10175000	10328000	12971000	10514000	12555000	10549000	10955000	11838000	9125200	10681000	11484000	9669200
mws0264	341.11	119	342.116	C12H22O11	[M-H]-	D-Trehalose*	Others	Saccharides and Alcohols	99-20-7	1	9682000	7761800	8211400	8200900	9144600	8831700	8317100	9690800	7030900	7713900	8244100	8248800	7890800	7682800	9429100	7556500	9899300	8422500	6603600
Lmjn005592	343.08	313.04	344.09	C18H16O7	[M-H]-	Cirsilineol (4',5-Dihydroxy-3',6,7-trimethoxyflavone)	Flavonoids	Flavonoid	41365-32-6	3	30374	29004	33517	38146	36518	35019	27376	29382	29511	28798	30203	29463	27660	25886	28486	28732	29253	22825	24933
mws1474	345.1	284	344.09	C18H16O7	[M+H]+	5,7-Dihydroxy-3',4',5'-trimethoxyflavone	Flavonoids	Flavonoid	18103-42-9	2	17892	16602	18661	25996	18895	23266	14394	14213	14053	13233	12737	15535	15929	14570	13357	15349	15998	18820	16983
HJAP058	345.1	284.07	344.125	C19H20O6	[M+H]+	5,6,7,4'-Tetramethoxyflavanone	Flavonoids	Flavonoid	2569-77-9	2	19745	13242	16742	21666	16109	16196	14578	11498	16704	14778	17459	13899	12115	14130	14380	14859	13411	14252	13073
MWS1983	343.12	89.03	344.132	C12H24O11	[M-H]-	Maltitol	Others	Saccharides and Alcohols	585-88-6	3	276660	197540	325170	318010	261240	243340	249310	220810	290780	257440	256740	293030	245300	316730	227950	160970	325220	173040	285970
MWSslk074	343.12	59.01	344.132	C12H24O11	[M-H]-	Lactitol	Others	Saccharides and Alcohols	585-86-4	3	172430	108130	162620	140100	172550	109100	113000	93386	112920	112130	114500	87509	88360	133910	79626	94565	155200	102870	119940
mws0609	344.04	150	345.047	C10H12N5O7P	[M-H]-	Guanosine 3',5'-cyclic monophosphate	Nucleotides and derivatives	Nucleotides and derivatives	7665-99-8	2	40230	35946	44253	29764	24138	30187	10183	13637	12926	11969	13808	9802.6	20245	13417	18768	21910	26451	22991	24563
pmb0801	346.11	184.1	345.106	C14H19NO9	[M+H]+	4-Pyridoxic acid-O-glucoside	Others	Vitamin	-	1	190000	187630	170750	252430	260830	260310	201670	200570	204080	154530	141500	177530	175110	178230	178370	123210	139480	150760	151750
mws1002	345.06	330	346.069	C17H14O8	[M-H]-	Syringetin	Flavonoids	Flavonoid	4423-37-4	2	19225	8685.1	11062	16352	11924	11436	13140	14445	12255	9328.7	7789.1	7032.6	9243.9	13496	12627	11047	12732	14139	11545
Lmgn002933	345.1	315.05	346.106	C18H18O7	[M-H]-	5,7-Dihydroxy-2',3',4'-trimethoxydihydroisoflavone	Flavonoids	Dihydroisoflavone	-	3	20093	14254	11752	21778	21746	13264	13192	14023	17824	20067	20465	17405	14175	15347	14082	19521	12376	18336	18812
Lmyp003381	347.13	301.13	346.126	C15H22O9	[M+H]+	3,4,5-Trimethoxyphenyl-1-O-β-D-glucoside	Phenolic acids	Phenolic acids	-	1	519800	487900	498800	485820	426960	499650	507910	477010	449810	479130	482860	529470	470050	482910	482140	376670	384650	376930	435470
Smmp009329	347.18	301.18	346.178	C20H26O5	[M+H]+	Isorosmanol	Terpenoids	Ditepenoids	93780-80-4	3	26241	19513	24468	65067	60658	50829	62911	55887	60539	28230	22964	23810	51578	51640	39199	25615	30107	30074	27963
MWSmce270	347.18	231.1	346.178	C20H26O5	[M+H]+	Rosmanol	Phenolic acids	Phenolic acids	80225-53-2	3	9554.8	6264	15408	23237	22125	21080	29157	27541	27682	4846.9	4526.1	4289.4	14034	20588	10373	11449	8574.9	13424	14403
Smmp008919	347.18	301.18	346.178	C20H26O5	[M+H]+	epirosmanol	Terpenoids	Ditepenoids	-	3	662570	356550	400420	169500	198770	183950	207150	239790	234500	46584	36960	44845	135130	198130	154620	129130	141110	125560	150980
pmb0981	348.07	136	347.063	C10H14N5O7P	[M+H]+	Adenosine 5'-monophosphate	Nucleotides and derivatives	Nucleotides and derivatives	61-19-8	2	632310	751110	637800	137940	106380	161830	261890	228830	348090	880200	714390	911710	168810	228580	223320	285050	306670	297900	363750
pmb0532	349.05	137.3	348.047	C10H13N4O8P	[M+H]+	Inosine 5'-monophosphate	Nucleotides and derivatives	Nucleotides and derivatives	131-99-7	3	40210	48661	60776	5847.2	11961	13645	20417	17087	19371	53563	55630	62215	11282	16826	15979	16882	25136	27106	20175
pmf0557	327.04	171	350.034	C16H11N2NaO4S	[M-Na]-	Orange I	Alkaloids	Alkaloids	523-44-4	2	64480	74914	74285	170070	158630	181180	252660	270370	280150	34150	40238	38989	199520	239190	231150	120240	124460	115150	129680
pmb1562	351.25	146.9	350.246	C21H34O4	[M+H]+	1-Stearidonoyl-Glycerol	Lipids	Glycerol ester	-	1	8928.1	8631.2	9633.2	14553	12628	16400	7344.3	6377.5	9872.7	7196.2	6703.3	8963.1	21549	18129	21455	16325	22429	21687	19524
MWStz224	353.15	177.06	352.142	C20H20N2O4	[M+H]+	N-Feruloylserotonin	Alkaloids	Plumerane	68573-23-9	1	164790	198690	200270	79937	118750	106780	169430	178880	445460	65728	119580	130570	260710	186180	151630	238000	232540	220540	246140
MWStz202	353.15	177.06	352.142	C20H20N2O4	[M+H]+	cis-Moschamine	Alkaloids	Plumerane	193224-24-7	1	151170	201390	197960	84343	119920	108950	170240	190910	484700	87211	117080	118270	263190	160830	136610	213730	233070	223430	232350
Lmhp011388	353.27	261.22	352.261	C21H36O4	[M+H]+	2-α-Linolenoyl-glycerol	Lipids	Glycerol ester	55268-58-1	1	550380	615870	557760	381830	415480	431370	502100	531050	559700	417070	478040	485530	414450	496210	481720	412240	392820	470970	519370
Lmhp011562	353.27	261.22	352.261	C21H36O4	[M+H]+	1-α-Linolenoyl-glycerol	Lipids	Glycerol ester	-	1	554350	632330	532780	403840	426160	423030	487980	539390	526060	472120	463500	483010	427430	483390	507100	416540	387350	452590	504410
Lmhp112042	355.28	263.24	354.277	C21H38O4	[M+H]+	1-Linoleoylglycerol	Lipids	Glycerol ester	2277-28-3	1	1414400	1493700	1218700	1163900	1228300	1304000	1581100	1669300	1691100	1143000	1220800	1243500	952800	1232000	1298000	1017800	1138700	1110100	1344100
Lmhp012042	355.28	263.24	354.277	C21H38O4	[M+H]+	2-Linoleoylglycerol	Lipids	Glycerol ester	3443-82-1	1	1410400	1447100	1296700	1141100	1274400	1314300	1552600	1672900	1652300	1153300	1208700	1283000	1038400	1248400	1311800	1011000	1102500	1128300	1316100
Zmhn002422	355.1	193.05	356.11	C16H20O9	[M-H]-	1-O-Feruloyl-D-Glucose	Phenolic acids	Phenolic acids	-	2	22221	14410	18713	4485	19941	14296	12781	26921	27030	16790	9455.5	15717	27694	15639	17168	19056	14249	16616	14205
Hmhn003518	355.1	175.04	356.111	C16H20O9	[M-H]-	4-O-β-D-glucopyranosylferulic acid	Phenolic acids	Phenolic acids	-	1	6218.8	12004	19648	25210	20580	45298	13006	15171	11879	29144	16778	10244	24580	25797	21407	20801	22426	19657	15186
Hmmn002544	355.1	193.05	356.111	C16H20O9	[M-H]-	Ferulic acid-4-O-glucoside	Phenolic acids	Phenolic acids	117405-51-3	2	24708	30214	20930	47737	24188	37529	59691	61173	47732	18098	19823	17465	45748	38542	36295	32553	33262	32397	43118
pmb0296	357.3	265.4	356.293	C21H40O4	[M+H]+	1-Oleoyl-Sn-Glycerol	Lipids	Glycerol ester	129784-87-8	1	915760	770130	664240	564700	749710	899350	255420	326030	289520	604500	647660	569250	738750	663860	643350	605640	520950	685600	759600
Lmyp003301	358.11	178.05	357.106	C15H19NO9	[M+H]+	4-O-Methyl-DIBOA-Glucoside	Alkaloids	Alkaloids	-	3	958980	1069700	1084200	1475700	1791000	1645900	950350	984080	787860	950890	949840	1069000	743430	721850	768210	679200	691980	695720	795290
Lmyp002919	358.11	178.05	357.106	C15H19NO9	[M+H]+	2-Hydroxy-7-methoxy-1,4-benzoxazin-3(2H)-one glucoside (HMBOA glucoside)	Alkaloids	Alkaloids	17622-26-3	3	986330	982280	1017000	1569900	1703300	1638000	1002600	1022100	734550	892500	995280	1005200	687010	688890	648500	675590	668090	676730	699990
mws1526	359.13	197	358.126	C16H22O9	[M+H]+	Sweroside	Terpenoids	Sesquiterpenoids	14215-86-2	2	49133	44001	33606	37586	43955	38013	37112	28872	23200	40887	22816	26477	49382	40792	27940	27684	28951	44232	47860
mws0097	357.13	151	358.142	C20H22O6	[M-H]-	Pinoresinol*	Lignans and Coumarins	Lignans	487-36-5	2	31683	30443	27127	55115	45692	52725	19253	24979	25252	26859	23003	26657	54227	56408	55954	60257	57859	50659	66780
Lmsp004450	359.15	131.05	358.142	C20H22O6	[M+H]+	Dehydrodiconiferyl alcohol	Phenolic acids	Phenolic acids	97465-82-2	3	80169	90845	55958	203260	161990	157450	48556	54959	59850	68110	51160	88424	195570	198740	196440	164990	189830	160920	205750
Lmdn004267	357.13	151.04	358.142	C20H22O6	[M-H]-	Epipinoresinol*	Lignans and Coumarins	Lignans	24404-50-0	2	28508	28994	29492	43909	38103	50316	21702	22539	24845	26450	23207	29045	58478	61972	57940	56685	50596	57348	66857
pmb3107	359.1	182.1	360.106	C15H20O10	[M-H]-	Glucosyringic Acid	Phenolic acids	Phenolic acids	-	1	130940	98042	98830	119010	118140	128540	66937	60242	67839	34255	44427	27697	52857	51996	45878	48942	67287	57616	58496
Lmmn003748	359.15	180.08	360.157	C20H24O6	[M-H]-	Isolariciresinol	Lignans and Coumarins	Lignans	548-29-8	3	7716.3	6677.2	3164.7	9459.6	10297	9363.3	3019.1	2887.9	2147.3	6119	5398.7	6852.6	11655	14419	17532	21396	21547	24677	21833
pmb0998	364.07	152.1	363.058	C10H14N5O8P	[M+H]+	Guanosine 5'-monophosphate	Nucleotides and derivatives	Nucleotides and derivatives	85-32-5	2	20109	25782	25665	8983.1	11132	17353	8054	10114	20098	31516	25018	27746	7376.1	9490.9	15363	12020	14145	15921	14355
mws5040	365.11	203.05	364.078	C12H21O11Na	[M+H]+	Turanose	Others	Saccharides and Alcohols	547-25-1	2	7435200	8077600	4221100	7455500	7900200	7354200	5727700	6119000	5577100	7561800	5402000	5682100	6131300	5638200	5802600	4113000	7454300	7777500	8196600
pmb0964	366.2	204.1	365.17	C16H23N5O5	[M+H]+	Isopentenyladenine-7-N-glucoside	Nucleotides and derivatives	Nucleotides and derivatives	-	3	565910	604430	273710	603890	672460	376910	375650	500410	475470	455640	436440	455380	523650	475200	427140	343160	379490	512870	644860
pmb0752	369.12	177.1	368.111	C17H20O9	[M+H]+	3-O-Feruloylquinic acid	Phenolic acids	Phenolic acids	1899-29-2	2	76514	69033	71690	78836	54868	93034	25500	13949	29733	45476	68342	57655	75593	110160	40534	62106	39783	38388	55852
Lmbp002309	371.1	209.05	370.126	C17H22O9	[M+H]+	Sinapaldehyde-4-O-Glucoside	Phenolic acids	Phenolic acids	154461-65-1	2	10202	6310.8	5811.1	14088	15055	19972	5816.9	12582	9683.2	20715	16424	14656	14551	15400	15273	20786	11906	12153	14965
pmn001695	371.1	249.06	372.106	C16H20O10	[M-H]-	Trihydroxycinnamoylquinic acid	Phenolic acids	Phenolic acids	-	1	2575000	2218300	2217400	2070300	2074100	2090400	2097400	2088100	2089400	1809400	1792500	1772900	2232400	2362200	2130700	2175000	2266400	2164000	2090900
Hmgn002833	371.11	297.11	372.12	C20H20O7	[M-H]-	4-Ketopinoresinol	Others	Others	-	1	703220	768320	645430	1332900	1183900	1285800	641340	597960	730450	640340	665060	630800	1195500	1325400	1270900	1195000	1212500	1023200	1249700
pmp001076	373.13	343.08	372.121	C20H20O7	[M+H]+	Isosinensetin	Flavonoids	Flavonoid	17290-70-9	2	3680.9	3248.6	4097.7	1860.7	2554.7	3088.1	3042.4	5276.3	2410.7	3958.3	5489.4	3333.4	1631.7	4349.3	4953.9	4767.2	3900.7	1418.3	2253.2
mws0055	373.13	343.09	372.121	C20H20O7	[M+H]+	Tangeretin (4',5,6,7,8-Pentamethoxyflavone)	Flavonoids	Flavonols	481-53-8	2	497860	507500	511440	478410	474350	508670	475710	505370	501830	480850	554550	528310	514910	527050	527660	527670	485950	534290	531330
Hmgn004693	371.11	327.03	372.121	C20H20O7	[M-H]-	(8'R,7'S)-(-)-8-Hydroxy-α-conidendrin	Lignans and Coumarins	Lignans	-	2	134300	128760	111560	241460	195920	261590	126220	122910	138040	123320	114530	120750	236410	241630	248600	232180	223160	198430	237450
Zmgp003492	373.12	105.03	372.121	C20H20O7	[M+H]+	8-Hydroxy-α-conidendrin	Others	Others	-	3	18877	16771	17921	19580	19759	10290	15032	18222	16130	15567	18336	16609	18195	18682	18654	7323	18071	25730	20530
pmb0064	374.11	198.08	373.101	C15H19NO10	[M+H]+	DIMBOA glucoside	Alkaloids	Alkaloids	18607-79-9	3	18302000	19225000	17157000	12793000	14053000	13039000	13729000	14684000	13885000	18315000	18511000	18594000	13753000	14061000	14476000	12702000	13497000	14593000	14627000
pmb0108	375.2	137.1	374.1	C19H18O8	[M+H]+	Feruloyl syringic acid	Phenolic acids	Phenolic acids	-	3	46520	50874	40054	87866	81331	69918	50704	41112	52312	28532	36119	27806	83144	81728	71546	44677	53716	48992	88422
mws1574	373.11	123	374.121	C16H22O10	[M-H]-	Geniposidic acid	Terpenoids	Monoterpenoids	27741-01-1	2	150620	152640	160190	109560	121550	105870	120930	136370	134220	176340	162640	181580	113930	127470	113930	126280	138940	120250	139380
Hmgn004139	373.13	329.05	374.136	C20H22O7	[M-H]-	Isohydroxymatairesinol	Lignans and Coumarins	Lignans	-	2	18958	15989	19726	28979	13145	24216	18188	18940	22352	27004	22391	23765	17520	40285	19450	22589	19805	15262	25865
mws0232	377.15	243.09	376.138	C17H20N4O6	[M+H]+	Riboflavin (Vitamin B2)	Others	Vitamin	83-88-5	1	77652	102600	98816	104630	82242	104590	219460	172010	174950	94866	100050	132940	101220	227820	164250	127700	112070	130210	127210
pme3337	384.12	252	383.108	C14H17N5O8	[M+H]+	Succinyladenosine	Nucleotides and derivatives	Nucleotides and derivatives	4542-23-8	1	310370	313760	274890	445810	377220	404540	381840	317910	401700	364440	376420	553480	451960	595330	478540	328540	304680	331000	408520
Hmbn005951	383.12	163.04	384.121	C21H20O7	[M-H]-	1,3-O-Di-p-Coumaroylglycerol	Phenolic acids	Phenolic acids	-	2	2611.5	2527.4	6118.2	5078.5	5712.3	5741.8	2705.1	2126.8	3263.8	1574	2605	1767.9	6383.5	7277.6	4629	5857.8	5087.9	3505.1	4251.6
pme1286	385.13	250	384.122	C14H20N6O5S	[M+H]+	S-(5'-Adenosy)-L-homocysteine	Amino acids and derivatives	Amino acids and derivatives	979-92-0	2	30276	40950	42908	41726	22304	46428	43164	63772	44860	49668	45722	45397	45127	54631	49096	53337	49862	49472	47575
pmb2940	385.11	205	386.121	C17H22O10	[M-H]-	1-O-Glucosyl sinapate	Phenolic acids	Phenolic acids	78185-48-5	2	15237	15326	14868	28219	29950	14700	8690.5	2713	4876.8	23864	10319	16424	5407	10116	4605.2	13548	20413	11258	19294
Zmhn002227	385.11	223.06	386.121	C17H22O10	[M-H]-	4-O-Glucosyl-sinapate	Phenolic acids	Phenolic acids	-	2	23070	12391	22604	21764	18192	59129	13302	26906	26192	4896	12332	6121	16603	20661	18610	40354	33436	31896	29999
HJN003	385.11	223.06	386.122	C17H22O10	[M-H]-	1-O-Sinapoyl-D-glucose	Phenolic acids	Phenolic acids	-	2	48929	30975	35490	25773	25493	22070	33643	15761	25593	34555	31220	25286	31305	30478	34174	27527	21692	30095	29846
pmn001423	385.19	223.13	386.194	C19H30O8	[M-H]-	Roseoside	Others	Others	54835-70-0	2	70121	53870	67559	39621	35298	47316	36614	22141	44270	51563	56470	60190	51764	57698	39878	48624	26869	47828	46143
pmp000113	389.12	359.08	388.116	C20H20O8	[M+H]+	5-Hydroxy-6,7,8,3',4'-pentamethoxyflavone	Flavonoids	Flavonoid	2174-59-6	2	5855.5	8751	5384.3	7940.6	6877	7171.6	4663.5	5648.9	6403.7	7715.5	7924.9	6975.1	6590.2	7769.4	8004.3	6323.6	11293	6176.4	5935.7
Jmbp006554	389.12	359.07	388.116	C20H20O8	[M+H]+	ethyl rosmarinate	Phenolic acids	Phenolic acids	-	3	9229.6	5262.6	7824.7	6966.2	6526.6	9351	7820.8	7151.9	5142.5	6032	7030	11785	5646.7	7265	7652.3	6904.1	8626	8362.6	7554.5
Lmwp011196	391.28	149.02	390.277	C24H38O4	[M+H]+	Bis(2-ethylhexyl)phthalate	Phenolic acids	Phenolic acids	117-81-7	1	11848000	15304000	8954900	7807200	9926300	8320800	10126000	11946000	18087000	10134000	9968800	9892200	10012000	8914700	12205000	3696200	3619000	3862500	3745900
Lmmp010562	391.28	149.02	390.277	C24H38O4	[M+H]+	Diisooctyl Phthalate	Phenolic acids	Phenolic acids	27554-26-3	1	12170000	15066000	9415600	7809600	9681500	8526900	10101000	12086000	18265000	9676000	9922600	9915300	9870500	8872400	12124000	3330900	3850700	3827900	3606100
pmb0489	397.2	147.04	396.19	C19H28N2O7	[M+H]+	N-Glucosyl-p-coumaroylputrescine	Alkaloids	Phenolamine	-	1	73610	57749	73730	51221	105410	75817	173670	165600	226750	2440.7	7637.7	3012.7	56964	57630	71958	39512	42646	41928	45687
pmc0281	400.15	136.11	399.139	C15H21N5O8	[M+H]+	Ribosyladenosine	Nucleotides and derivatives	Nucleotides and derivatives	-	3	195320	163490	211510	251340	178270	208200	273550	294490	276170	108010	114480	98982	237580	216930	245680	162210	175740	186980	181880
pmb0681	403.1	367.08	402.095	C20H18O9	[M+H]+	Apigenin-8-C-Arabinoside	Flavonoids	Flavonoid	-	2	65798	44494	51511	37144	48934	48976	60352	29934	64471	42622	49997	34184	33608	57231	60330	25756	33702	26717	45104
pmf0248	403.36	373.1	402.35	C27H46O2	[M+H]+	Delta-Tocopherol	Others	Vitamin	119-13-1	3	7888.7	8344.9	6675.1	5623.7	7165.3	8194.8	8120.4	6032.8	6517.7	6633.2	7601	8109.1	7197.6	6465.2	8912.9	5067.4	7067.6	7946.7	8130.7
pme3007	402.99	159	404.002	C9H14N2O12P2	[M-H]-	Uridine 5'-diphosphate	Nucleotides and derivatives	Nucleotides and derivatives	27821-45-0	2	6538.7	5753.4	1567.3	7856	11558	7815	10697	3467.1	6307.6	1172.2	3013	2747.8	3285.1	6239.9	2466.5	4118.4	4893.5	5505.1	6780.7
pmb3031	403.1	313.1	404.111	C20H20O9	[M-H]-	Tricin-4'-O-glycerol	Flavonoids	Flavonoid	-	1	115700	115160	109290	138440	117950	105620	92010	78682	120200	165460	181580	171950	132700	172490	126580	145280	138910	131190	145120
pmb0500	411.19	177.05	410.184	C23H26N2O5	[M+H]+	N-p-Coumaroyl-N'-feruloylputrescine	Alkaloids	Phenolamine	380302-96-5	2	8706.2	10701	11467	4740.7	4589.2	8447.1	11140	7543.7	22840	6466.6	6653.7	6963.8	11071	10435	12418	8964	12240	12903	9319
pmb2165	412.25	184.07	411.239	C18H38NO7P	[M+H]+	LysoPC 10:0	Lipids	LPC	22248-63-1	3	58591	49309	46339	27573	30545	30411	15767	18065	17129	46747	36347	54376	48369	48387	34584	48913	48559	50377	47066
MWS20152	417.16	402.1	418.163	C22H26O8	[M-H]-	Syringaresinol	Lignans and Coumarins	Lignans	21453-71-4	2	5316.2	3165.4	2760.4	3189	4870.1	3981.1	1920.6	2439.8	3009.4	9997.5	12145	14066	5202.2	3517.8	3629.5	3558.7	6113.2	4705.3	6244.4
mws1089	421.1	241	422.083	C12H23O14P	[M-H]-	Sucrose-6-phosphate	Others	Saccharides and Alcohols	-	3	453270	615080	545950	814040	663960	778890	622520	627750	539340	365360	407800	399170	505480	449280	630410	543930	541000	445530	440730
mws2523	421.08	241.1	422.083	C12H23O14P	[M-H]-	Trehalose 6-phosphate	Others	Saccharides and Alcohols	4484-88-2	1	699210	663510	615760	951180	838090	829020	781190	768270	696280	446740	471280	441860	699370	624700	701440	596070	522160	542670	610910
Lmhp008337	426.26	285.24	425.254	C19H40NO7P	[M+H]+	LysoPE 14:0(2n isomer)	Lipids	LPE	-	1	2025200	1631100	1448000	1489100	1400000	1428600	1070900	1300600	1326200	1655900	1600600	1694500	1770600	1802400	1563300	1733200	1782100	1973400	1953100
pmb0864	426.26	285.24	425.254	C19H40NO7P	[M+H]+	LysoPE 14:0	Lipids	LPE	-	1	6421000	4900800	4407900	4882100	4693700	4791100	3566900	4017200	4141100	4918400	4928700	4865900	5492700	5737400	5221600	5688300	5458400	5896700	6036900
pmf0085	427.39	345	426.386	C30H50O	[M+H]+	Cycloartenol	Terpenoids	Triterpene	469-38-5	3	8028.5	9207.1	12140	8081.9	11715	11722	7869.8	9387	8622.6	10852	8746.1	8698.5	8517	8863.9	9448.9	8985.4	8605.7	12440	11691
Cmbn007148	429.12	429.12	430.126	C22H22O9	[M-H]-	1-O-Feruloyl-3-O-caffeoylglycerol	Lipids	Glycerol ester	-	3	26709	15435	20269	21791	25990	26982	45733	44727	33826	20685	17751	17120	47811	60695	34223	32634	33979	28628	25056
Lmlp005572	433.11	271.06	432.106	C21H20O10	[M+H]+	Galangin-7-O-glucoside	Flavonoids	Flavonoid	-	1	99339	67826	160490	217430	174720	202180	47862	20979	70051	36538	48209	19905	130350	185900	99555	176910	179690	166270	183410
mws1434	431.1	311	432.106	C21H20O10	[M-H]-	Apigenin-6-C-glucoside (Isovitexin)*	Flavonoids	Flavonoid carbonoside	29702-25-8	1	147380	171560	159450	215750	157850	200250	94550	104760	129750	192100	179040	169620	136160	172340	150040	142120	151610	142500	151700
MWSHY0189	433.11	271.07	432.106	C21H20O10	[M+H]+	Apigenin-7-O-glucoside(Cosmosiin)	Flavonoids	Flavonoid	578-74-5	2	29590	33090	60302	44488	32524	35682	29950	44253	63968	54385	28064	25353	41990	38900	36394	37244	40480	44113	42123
MWSslk002	433.11	271.06	432.106	C21H20O10	[M+H]+	Sophoricoside	Flavonoids	Isoflavones	152-95-4	1	32470	38450	74360	29030	38916	37772	28808	58926	68217	59684	40467	21036	65242	48670	36334	45843	41583	39092	39072
Zmdn004052	431.1	269.05	432.106	C21H20O10	[M-H]-	Aloe emodin-1-O-glucoside	Quinones	Anthraquinone	-	2	22559	21630	47137	74632	47764	71398	14028	12032	38966	5128	6373	10773	60061	48367	43396	54619	52726	67010	72008
pmp000413	433.11	283.06	432.106	C21H20O10	[M+H]+	Genistein-8-C-glucoside	Flavonoids	Isoflavones	66026-80-0	1	89350	77762	83524	87957	90976	93190	52844	46925	55650	117520	96696	89369	73292	60900	87927	57287	50648	70460	66828
Lmgp003335	433.11	271.06	432.106	C21H20O10	[M+H]+	4',5-Dihydroxyisoflavone-7-O-galactoside	Flavonoids	Isoflavones	-	1	40722	42916	70778	37011	48002	32868	36984	38716	55155	66481	28166	18692	55598	43386	41923	31590	43300	38552	40142
mws0895	431.1	269	432.106	C21H20O10	[M-H]-	Genistein-7-O-Glucoside (Genistin)	Flavonoids	Isoflavones	529-59-9	2	2566.2	1280.5	9	5090.5	8900.5	10194	1908.8	2545	1251	639.5	1280	1263.5	5078	3795.2	8958.8	11536	10194	5101.5	10202
mws0048	431.1	311	432.106	C21H20O10	[M-H]-	Apigenin-8-C-Glucoside (Vitexin)*	Flavonoids	Flavonoid carbonoside	3681-93-4	1	50530	94553	96903	96503	72114	65015	54755	36948	43946	102900	103500	85720	74828	72488	70224	38667	57567	45202	68189
mws0072	433.11	271.01	432.106	C21H20O10	[M+H]+	Apigenin-5-O-glucoside	Flavonoids	Flavonoid	28757-27-9	2	69548	66704	123770	175450	148350	204330	57410	28364	86274	19921	33148	22093	142760	161960	100120	156050	174710	141720	183480
Lmgp004731	433.11	271.06	432.106	C21H20O10	[M+H]+	Genistein-7-O-galactoside	Flavonoids	Isoflavones	-	1	41172	36206	84258	54946	52249	21702	42715	48140	62218	50316	31826	26322	40454	50454	48696	31457	35353	33967	26262
pmp000117	433.15	403.11	432.142	C22H24O9	[M+H]+	3,5,6,7,8,3',4'-Heptamethoxyflavone	Flavonoids	Flavonols	1178-24-1	2	3232.4	3518.1	2612.9	4740.9	2275.2	4107.6	1827.8	3366.5	4011.6	2835.3	2690.5	3133.6	1664	1121.3	2244.6	4479	3436.6	4440.6	4918.7
pmb0744	435.11	331.08	434.1	C24H18O8	[M+H]+	Tricin-4'-O-Benzoic Acid	Flavonoids	Flavonoid	-	1	450050	352080	346740	513440	420000	434670	281770	296730	266910	557820	586680	581190	394470	398540	395610	422660	404180	457780	440040
HJN087	433.12	271.06	434.121	C21H22O10	[M-H]-	Naringenin-4'-O-glucoside	Flavonoids	Flavonoid	-	2	3810	5441.2	6920.8	5439.6	831.02	7098.4	7360.5	11855	14190	139010	137930	140340	6195.1	7022.6	8732.4	18023	15983	11599	15402
Cmzn005251	433.11	271.06	434.121	C21H22O10	[M-H]-	6-O-Caffeoylarbutin	Phenolic acids	Phenolic acids	136172-60-6	2	2399.5	4904	100520	4322.5	4347	9907	4355.5	8030	22282	33216	35564	50142	5562.2	5570.8	3713.5	9305	10522	12360	16798
Lmfn004093	435.13	315.09	436.137	C21H24O10	[M-H]-	Phloretin-4'-O-glucoside (Trilobatin)	Flavonoids	Chalcones	4192-90-9	1	9	9	9	9	3857.8	30419	9	9	9	847460	897590	936350	9	9	9	66761	70563	63072	84586
Lmhp008440	438.26	297.24	437.254	C20H40NO7P	[M+H]+	LysoPE 15:1	Lipids	LPE	-	3	34681	32723	24927	21624	21207	20250	16344	11912	14540	54224	57005	53457	35803	30517	25821	31881	31027	36689	41168
Lmhp008273	438.26	297.24	437.254	C20H40NO7P	[M+H]+	LysoPE 15:1(2n isomer)	Lipids	LPE	-	3	10502	7981.2	7393	9332.1	8030.3	8730.9	8897	8381.4	12196	19722	19197	18226	14796	13723	11711	15237	14001	11759	14391
Lmlp003024	439.22	277.17	438.211	C20H30O7N4	[M+H]+	N'-p-Coumaroylagmatine-glucoside	Alkaloids	Phenolamine	-	3	16034	33405	28557	9063.9	17889	8721.6	11923	22579	26790	24380	17649	28771	23508	41320	16923	23435	18200	21759	13155
Lmhp008885	440.28	299.26	439.27	C20H42NO7P	[M+H]+	LysoPE 15:0(2n isomer)	Lipids	LPE	-	3	73216	68766	60224	67179	70730	53524	63331	75824	81405	97387	103470	106170	78193	82338	72130	70290	72328	88763	87305
pmb0862	440.28	184.07	439.27	C20H42NO7P	[M+H]+	LysoPC 12:0	Lipids	LPC	20559-18-6	3	2236400	1748400	1492400	1391500	1365000	1310400	799270	876460	869960	1270200	1164800	1283800	1683300	1613200	1404600	1621300	1649300	1712100	1710800
Lmhp009187	440.28	299.26	439.27	C20H42NO7P	[M+H]+	LysoPE 15:0	Lipids	LPE	-	3	68555	65525	70074	55886	64225	62237	64217	75203	71849	102070	105310	92879	87072	81895	86284	78954	79968	71131	86990
mws1397	441.08	169	442.09	C22H18O10	[M-H]-	Epicatechin gallate	Flavonoids	Flavanols	1257-08-5	2	9	9	9	9	3179.8	3808.5	9	9	9	10897	2522	1883.2	81860	1272.5	4370	8973.2	3132.8	5711	6366.2
pmp001247	442.2	221.08	442.182	C21H32NO9+	[M]+	Feruloylcholine glucoside	Alkaloids	Alkaloids	-	2	9	9	9	23397	18495	16358	34763	32637	39909	9	9	9	11392	11721	9423.7	6575.1	6558.9	5038.2	7465.6
Hmbp006861	445.15	177.05	444.142	C23H24O9	[M+H]+	1,2-O-Diferuloylglycerol*	Phenolic acids	Phenolic acids	-	2	29311	42737	120640	109850	80889	85532	34455	35593	28774	29786	25667	30295	35846	62016	55243	38351	39600	43050	43245
pmp000091	445.15	177.05	444.142	C23H24O9	[M+H]+	1,3-O-Diferuloylglycerol*	Phenolic acids	Phenolic acids	83008-46-2	2	34699	43831	119030	115070	86544	83889	34297	31142	34004	25834	24516	25551	27776	60253	55230	44608	47174	41159	47107
pme1014	445.3	341.3	444.303	C31H40O2	[M+H]+	Menatetrenone (Vitamin K2)	Others	Vitamin	11032-49-8	3	106760	108940	127760	143890	144430	131960	135780	117070	134460	156960	131460	148510	138270	133210	135110	108720	143300	152270	164100
pmp000878	447.13	411.1	446.121	C22H22O10	[M+H]+	Swertisin	Flavonoids	Flavonoid carbonoside	6991-10-2	2	96764	61541	84401	121150	100310	125800	67762	52634	65187	37445	56825	37648	50813	34816	35215	31103	32594	36268	47439
Lmlp001118	448.2	286.15	447.189	C23H29NO8	[M+H]+	3'-Glucosyl-6,7-dihydroxy-N-methyl-benzyltetrahydroisoquinoline	Alkaloids	Alkaloids	-	2	1761400	1633800	1910200	1855200	1936500	1817900	2208300	1827500	2093600	4856400	4964000	5501000	3686400	3732200	3419300	2743400	2911400	2839100	3390600
MWSHY0104	449.11	287.06	448.101	C21H20O11	[M+H]+	Luteolin-7-O-glucoside (Cynaroside)	Flavonoids	Flavonoid	5373-11-5	2	54018	37826	64458	81282	110020	83862	66682	43744	45968	133170	144100	118290	122040	78626	44478	68965	79319	52656	73430
mws0089	447.09	285.04	448.101	C21H20O11	[M-H]-	Kaempferol-7-O-glucoside	Flavonoids	Flavonols	16290-07-6	1	9	9	9	9	6320.8	13049	9318.2	9051.2	9	9	11568	8052.8	9304	15128	9801.5	15211	14018	8439.2	13875
MWSHY0016	449.11	299.06	448.101	C21H20O11	[M+H]+	Luteolin-6-C-glucoside (Isoorientin)	Flavonoids	Flavonoid carbonoside	4261-42-1	1	47012	50267	53245	132800	145110	163920	63886	39832	91591	95416	129340	88378	161800	160290	61445	98304	59620	66266	93413
Xmyp005654	449.11	287.06	448.101	C21H20O11	[M+H]+	Kaempferol-4'-O-glucoside	Flavonoids	Flavonoid	-	2	81520	64975	61600	75553	115000	126840	71740	60788	28934	130810	118090	131320	111890	65229	71738	65952	48932	64830	77830
mws1299	449.11	299.2	448.101	C21H20O11	[M+H]+	Luteolin-8-C-glucoside (Orientin)	Flavonoids	Flavonoid carbonoside	28608-75-5	1	60943	44347	49434	132810	163460	190060	79009	59253	64396	113260	133190	110040	183720	192540	73152	78248	66752	100650	103360
pmn001716	447.09	285.04	448.101	C21H20O11	[M-H]-	Carthamone	Flavonoids	Chalcones	86579-00-2	2	28146	26905	24543	34712	50456	40918	28253	33332	17268	71961	69075	57858	54762	51228	23822	52381	44573	45404	35388
Lmlp003531	449.11	287.06	448.101	C21H20O11	[M+H]+	Luteolin-3'-O-glucoside	Flavonoids	Flavonoid	5154-41-6	2	2490.5	2842.5	6665.5	7656	10121	10876	6634.5	1920	15149	5414.8	7911	3786.8	20137	26018	13671	14543	17127	10405	18456
mws0913	447.09	285	448.101	C21H20O11	[M-H]-	Kaempferol-3-O-galactoside (Trifolin)	Flavonoids	Flavonols	23627-87-4	2	26471	20124	20099	28295	37282	25276	15088	28936	5109.5	43232	60294	59832	54060	28362	23668	28265	29210	26173	35390
Smnp001863	449.14	287.09	448.137	C22H24O10	[M+H]+	8-O-methyl-7-hydroxyaloin	Quinones	Anthraquinone	-	3	88995	64490	59948	114630	86704	124220	65402	60760	70688	152540	181800	126410	109480	84459	50791	85062	63051	63588	59656
MWSmce674	451.36	89.06	450.35	C31H46O2	[M+H]+	Phylloquinone (Vitamin K1)	Others	Vitamin	84-80-0	3	15433	14872	12457	14632	12213	11387	12457	12166	11919	14176	12992	11822	12168	12803	13072	11930	10477	12350	12463
Lmhp008763	452.28	311.26	451.27	C21H42NO7P	[M+H]+	LysoPE 16:1(2n isomer)	Lipids	LPE	-	1	311560	216480	276050	289650	226220	242960	279150	232330	331510	387360	382870	409320	378880	665830	450000	332450	388220	375730	445230
Lmhp009034	452.28	311.26	451.27	C21H42NO7P	[M+H]+	LysoPE 16:1	Lipids	LPE	-	1	311830	190580	191110	355520	211240	271680	261630	248150	297770	472090	494450	491400	474430	548370	533030	311120	415990	393740	454400
HJN093	451.09	313.05	452.095	C20H20O12	[M-H]-	2-O-Salicyl-6-O-Galloyl-D-Glucose	Phenolic acids	Phenolic acids	-	3	25600	21040	13152	33764	22368	35782	12796	17968	27670	7307.5	11637	15756	27181	33274	32852	41967	23546	24779	23754
Hmpn005101	451.12	289.07	452.131	C21H24O11	[M-H]-	Sieboldin	Flavonoids	Chalcones	18777-73-6	3	9941.5	11861	14998	14939	6252.2	9430.5	3168	14385	8704.5	12448	12421	15687	1245.5	3751	7477.2	8078.5	10006	3093.2	8750.2
pmb0876	454.29	313.27	453.286	C21H44NO7P	[M+H]+	LysoPE 16:0	Lipids	LPE	53862-35-4	1	25773000	24175000	22517000	27166000	26807000	26971000	29731000	30654000	31749000	31365000	31360000	32855000	31279000	31918000	33591000	28149000	29508000	29151000	31563000
pmd0160	454.29	313.27	453.286	C21H44NO7P	[M+H]+	LysoPE 16:0(2n isomer)	Lipids	LPE	-	1	26070000	25109000	23224000	27304000	27239000	27479000	29984000	31335000	30771000	30562000	31301000	32557000	30102000	31323000	29749000	28637000	28099000	30502000	30599000
MWSmce134	453.35	453.35	454.345	C30H46O3	[M-H]-	Betulonic acid	Terpenoids	Triterpene	4481-62-3	3	6742.6	7379.1	7827.3	9833.1	6948.4	9751.6	10800	11210	10188	8861	9877.3	11743	12359	15393	8649.2	11388	13140	8652.5	7730.1
Lmqn012798	453.34	453.34	454.345	C30H46O3	[M-H]-	Urs-12(13)-en-3-one-28-oic acid	Terpenoids	Triterpene	-	3	8170	6075.4	7122.6	8720	6686.3	7242.6	14019	9877.8	14522	10801	10276	10107	16936	10512	10515	12771	8042.8	10093	9350.1
pmn001700	455.35	455.35	456.36	C30H48O3	[M-H]-	24,30-Dihydroxy-12(13)-enolupinol	Terpenoids	Triterpene	-	2	368010	499430	470300	406680	351850	370720	459280	577670	573240	250400	281000	307470	306720	336120	406310	495360	368240	369930	296840
mws4053	455.35	455.35	456.36	C30H48O3	[M-H]-	Ursolic acid	Terpenoids	Triterpene	77-52-1	2	89288	90359	99866	132210	108580	109200	90388	112580	117070	107990	106800	103530	119190	101990	97841	146160	118970	106480	93396
HJN110	455.36	455.36	456.36	C30H48O3	[M-H]-	Betulinic acid	Terpenoids	Triterpene	472-15-1	2	100570	94413	93620	130660	133500	116670	106460	115260	138160	110600	103290	117130	130110	105980	118830	148440	130280	102140	95632
pmb0464	458.1	116.3	457.143	C16H27NO14	[M+H]+	L-Aspartic acid-O-diglucoside	Amino acids and derivatives	Amino acids and derivatives	-	3	2971100	4588100	4215200	4568500	2964200	6255500	2928800	3185900	2650100	1808600	2516100	1959800	1871500	1678700	2334600	2715400	2692500	2571800	2218700
pmb2654	460.1	117.9	461.153	C19H27NO12	[M-H]-	Anthranilate-1-O-Sophoroside	Phenolic acids	Phenolic acids	-	3	3457600	3229500	3207100	4326100	2911400	4722600	3352000	3165400	4320600	2586800	2858500	2469400	1826400	2236400	3071900	2550100	2833400	2667700	2383700
MWSslk237	463.13	301.09	462.116	C22H22O11	[M+H]+	Homoplantaginin	Flavonoids	Other Flavonoids	17680-84-1	2	336700	271990	260410	457800	354270	362390	211400	165890	159280	324330	322150	357720	276170	277660	289660	301570	268340	251490	262610
pmp000233	463.12	313.07	462.116	C22H22O11	[M+H]+	Swertiajaponin	Flavonoids	Flavonoid carbonoside	6980-25-2	1	63343	49094	65700	177370	222290	222330	109250	61474	62602	70136	67128	78213	110640	86096	59732	70798	70606	75200	72915
Lmjp003655	463.12	301.08	462.116	C22H22O11	[M+H]+	6-C-MethylKaempferol-3-glucoside	Flavonoids	Flavonoid	-	2	299870	284420	337920	393210	498660	368300	183660	202050	188690	322620	286580	307630	360730	297190	282920	289870	268530	272840	294740
pmp000579	463.12	301.07	462.116	C22H22O11	[M+H]+	Diosmetin-7-O-galactoside*	Flavonoids	Flavonoid	-	1	346860	275120	357380	400050	431170	444420	206200	201490	183370	335980	367700	357330	293930	297450	243730	254050	327190	276650	295580
Hmmp004965	463.12	301.07	462.116	C22H22O11	[M+H]+	Diosmetin-7-O-glucoside	Flavonoids	Dihydroflavone	20126-59-4	1	299360	261620	286980	403920	411780	337890	177910	179010	200100	305110	303900	327080	297280	278450	244700	281070	277960	367030	356760
pmp000120	463.12	427.1	462.116	C22H22O11	[M+H]+	Diosmetin-6-C-glucoside	Flavonoids	Flavonoid	-	2	25442	11098	20687	44344	31714	41747	15542	15508	13584	196870	146500	191820	18403	22143	23676	34710	28123	30330	18461
Lmnp002845	463.13	343.09	462.116	C22H22O11	[M+H]+	Hispidulin-8-C-glucoside*	Flavonoids	Flavonoid carbonoside	-	2	38702	41783	44432	90054	105820	116080	46526	24401	56038	457210	446820	433020	37922	64345	33291	68612	69386	60619	79772
Cmyp002064	463.12	301.08	462.116	C22H22O11	[M+H]+	Yuanhuanin	Flavonoids	Flavonoid	83133-14-6	2	395070	251530	375930	677120	535370	591710	146330	90634	112180	30471	25232	30272	405340	465570	329200	481700	431040	441650	491750
pmb2999	461.11	299.1	462.116	C22H22O11	[M-H]-	Chrysoeriol-5-O-glucoside	Flavonoids	Flavonoid	-	2	213360	167690	195310	303270	281180	260820	89351	57510	63526	6454.2	12268	9222.5	279430	255910	229920	242610	274300	261040	283700
pmb3012	461.11	299.2	462.116	C22H22O11	[M-H]-	Chrysoeriol-7-O-glucoside*	Flavonoids	Flavonoid	19993-32-9	1	22221	16349	26598	35996	34894	55758	16417	15468	13545	20628	22348	34137	42923	33877	23560	26372	24676	28624	18808
HJAP011	463.11	343.08	462.116	C22H22O11	[M+H]+	Chrysoeriol-8-C-glucoside (Scoparin)*	Flavonoids	Flavonoid	301-16-6	2	55615	36192	50330	102100	76229	124850	54667	31778	29602	440080	378290	434770	34615	69346	43073	69063	74000	73816	76190
MWSHY0113	465.1	303.06	464.095	C21H20O12	[M+H]+	Quercetin-3-O-galactoside (Hyperin)	Flavonoids	Flavonols	482-36-0	2	21887	15493	18307	36816	40264	32915	17636	14241	14301	9	9	9	36426	33262	13412	29358	26144	29067	32490
Smgp004575	465.1	303.05	464.095	C21H20O12	[M+H]+	Quercetin-5-O-β-D-glucoside	Flavonoids	Flavonols	-	2	28153	16922	32504	23228	38200	42590	15552	13501	18316	9	9	9	23196	36090	10230	39238	28264	21553	43087
Lmhp009769	466.29	325.27	465.286	C22H44NO7P	[M+H]+	LysoPE 17:1	Lipids	LPE	-	3	166160	85438	119890	174340	94237	381070	198460	419470	468050	168410	109170	110170	224770	481940	284520	169880	178830	179230	215850
Lmhp009464	466.29	325.27	465.286	C22H44NO7P	[M+H]+	LysoPE 17:1(2n isomer)	Lipids	LPE	-	3	169520	93038	140110	175940	94010	361040	187350	416180	431130	172810	107920	122600	202200	559840	311900	172110	161520	183740	187660
pmd0130	468.31	184.07	467.301	C22H46NO7P	[M+H]+	LysoPC 14:0	Lipids	LPC	20559-16-4	1	1997100	1602400	1481200	1536000	1378000	1418800	1086100	1296000	1245100	1452800	1403500	1462800	1692400	1692400	1521100	1546700	1594800	1716300	1661100
Lmhp010162	468.31	327.29	467.301	C22H46NO7P	[M+H]+	LysoPE 17:0	Lipids	LPE	-	3	6004.1	9395.5	5560.9	9009.2	8982	11790	17262	14636	11612	11479	10737	15202	6287.4	10426	7792.1	8772.9	7084.3	5043.8	6112.5
MWSmce446	469.17	307.12	468.163	C22H28O11	[M+H]+	Cimifugin-7-O-glucoside	Others	Others	80681-45-4	2	37526	37568	28678	47869	32530	33876	32078	34624	31669	69914	62470	74142	42260	70730	55928	69246	39729	51238	50859
pmb1912	474.17	327	473.166	C20H23N7O7	[M+H]+	10-Formyltetrahydrofuran	Alkaloids	Alkaloids	2800-34-2	1	671180	662770	662290	692950	650770	754190	654400	571780	587300	665970	948780	1151700	948690	1110500	873910	706670	588510	513780	799960
Lmhp008589	476.28	335.26	475.27	C23H42NO7P	[M+H]+	LysoPE 18:3(2n isomer)	Lipids	LPE	-	1	1189100	973290	988430	818700	736890	799240	491290	592270	538850	2009200	1894000	2000200	1403500	1542700	1254800	1426200	1463600	1513400	1640500
Lmhp008801	476.28	335.26	475.27	C23H42NO7P	[M+H]+	LysoPE 18:3	Lipids	LPE	-	1	1248600	1041500	1024200	862080	723050	845610	485540	606700	585950	2128100	1860900	1983400	1492700	1632800	1364500	1400000	1419400	1602000	1551600
pme1683	477.2	258	476.168	C18H32CaN2O10	[M+H]+	Calcium Pantothenate	Organic acids	Organic acids	137-08-6	3	12350	18349	19922	17735	19582	27433	26117	27295	24102	29260	28872	23569	32225	31135	25517	22397	22375	22114	27714
pmb0881	478.29	337.27	477.286	C23H44NO7P	[M+H]+	LysoPE 18:2	Lipids	LPE	-	2	423790	370100	283570	300430	286690	290080	195710	224010	209490	491520	478700	480430	419430	407740	397480	413290	419080	390860	425230
pmb0874	478.29	337.27	477.286	C23H44NO7P	[M+H]+	LysoPE 18:2(2n isomer)	Lipids	LPE	-	1	410380	341960	331230	329210	273520	313750	221870	203390	215330	471440	466740	443700	423750	391630	357600	404810	405970	382910	398280
pmb0856	480.31	339.29	479.301	C23H46NO7P	[M+H]+	LysoPE 18:1(2n isomer)	Lipids	LPE	-	1	5258400	4495000	5139900	6032900	5421600	6542400	6232400	6436300	7821600	6882700	6756900	7133400	7190200	8912300	8035500	6386100	6960500	6816800	7299300
mws0289	480.31	339.29	479.301	C23H46NO7P	[M+H]+	LysoPE 18:1	Lipids	LPE	89576-29-4	2	8306000	7376500	7754600	9103400	8932800	10022000	9806000	10069000	11966000	10011000	10238000	11356000	11154000	13314000	12526000	9456000	10417000	10732000	10856000
pmb2260	480.31	184.07	479.301	C23H46NO7P	[M+H]+	LysoPC 15:1	Lipids	LPC	-	2	842680	685650	681090	509770	489260	447490	288450	364190	332410	1112700	1025400	1082100	754490	746220	687960	751230	745310	801390	829860
pmb0880	482.32	341.31	481.317	C23H48NO7P	[M+H]+	LysoPE 18:0(2n isomer)	Lipids	LPE	-	2	110960	97499	97157	123400	119940	129710	134990	126200	167320	144510	133210	141110	142760	190410	171480	138900	141300	123330	140120
Lmhp009129	482.32	184.07	481.317	C23H48NO7P	[M+H]+	LysoPC 15:0(2n isomer)	Lipids	LPC	-	1	389090	328300	273450	277170	275440	297160	362290	409980	452220	502900	592940	642830	441790	420380	419280	425290	465890	441370	448200
pmb0883	482.32	341.31	481.317	C23H48NO7P	[M+H]+	LysoPE 18:0	Lipids	LPE	69747-55-3	3	194320	205920	198750	400010	377490	437530	622760	683110	641860	303100	317950	344580	288720	333080	353710	298860	339770	328890	334970
pmb2319	482.32	184.07	481.317	C23H48NO7P	[M+H]+	LysoPC 15:0	Lipids	LPC	108273-89-8	1	1239300	1164200	951320	978550	1059200	945990	1020800	1217400	1249300	1776500	1781700	1836900	1347600	1260200	1304600	1169300	1349600	1388700	1396800
MWSmce613	489.12	264.04	488.107	C14H26N4O11P2	[M+H]+	Citicoline	Nucleotides and derivatives	Nucleotides and derivatives	987-78-0	3	75014	103320	90904	32208	48745	40593	84636	81391	80979	65746	52748	45458	31605	61072	59774	46564	71962	39338	39396
pmb0758	491.15	329	490.148	C24H26O11	[M+H]+	Anisic acid-O-feruloyl glucoside	Phenolic acids	Phenolic acids	-	2	11665	15614	18283	29336	32272	24434	24580	26098	21590	41564	25475	38729	38642	28466	31180	25008	40709	22498	35073
pmb0863	492.31	184.07	491.301	C24H46NO7P	[M+H]+	LysoPC 16:2(2n isomer)	Lipids	LPC	-	1	282450	256260	228260	164310	160680	157580	162170	174130	168470	417790	381110	405090	365040	355500	314180	312310	333830	346470	330610
pma1303	492.31	184.07	491.301	C24H46NO7P	[M+H]+	LysoPC 16:2	Lipids	LPC	-	3	315670	256060	222970	176860	150930	172310	166590	150440	166630	396550	356800	410160	360990	313170	312730	317270	343680	336520	349080
pmp000714	510.15	137.02	492.105	C23H24O12	[M+NH4]+	2'-(2,3-Dihydroxybenzoyl)gentiopicroside	Terpenoids	Monoterpenoids	-	2	11880	14340	4992.8	15407	16525	17896	7176.2	2871.5	720.5	15745	5766.5	3550.5	20502	17564	11486	14343	13619	18690	11518
pmb3042	491.12	329.1	492.127	C23H24O12	[M-H]-	Tricin-5-O-Glucoside	Flavonoids	Flavonoid	32769-00-9	2	622070	606270	725490	1387000	987030	1282100	742460	381980	615380	192320	146220	109910	1267300	1471800	958920	1042000	1076100	1084300	1073500
pmb0736	493.13	331.08	492.127	C23H24O12	[M+H]+	Tricin-7-O-Glucoside	Flavonoids	Flavonoid	32769-01-0	1	874780	737140	669550	1873400	1327300	1615300	512520	468360	459530	581750	570870	529380	1018400	857550	887040	741090	683920	860150	830430
Lmgp003546	493.13	331.08	492.127	C23H24O12	[M+H]+	4',5'-Dihydroxy-6,8-dimethoxyisoflavone-7-O-galactoside	Flavonoids	Isoflavones	-	1	896270	729800	730900	1925800	1522500	1759200	510980	441370	443160	571390	612930	685830	1059500	1029300	914070	753100	806360	839800	1002300
Lmhp206353	493.13	331.08	492.127	C23H24O12	[M+H]+	Tricin-4'-O-glucoside	Flavonoids	Flavonoid	-	3	963280	767300	700370	1920300	1480600	1756800	424640	456590	386140	541770	564590	630250	944500	831430	918470	700680	805550	888370	831950
Lmgp004829	493.13	331.08	492.127	C23H24O12	[M+H]+	5,7,4'-Trihydroxy-6,8-dimethoxyisoflavone-7-O-galactoside	Flavonoids	Isoflavones	-	1	935350	847520	728940	1980800	1563700	1856900	511220	484910	428900	577760	620430	575580	897100	1079700	915500	748560	776870	930060	968670
pmp000608	493.13	331.08	492.127	C23H24O12	[M+H]+	Aurantio-obtusin-6-O-Glucoside	Quinones	Anthraquinone	129025-96-3	1	960010	732710	707730	1742300	1578000	1801500	425090	470380	401780	603790	624780	665890	965630	904580	922030	721540	859280	855590	838050
Lmhp008833	494.32	184.07	493.317	C24H48NO7P	[M+H]+	LysoPC 16:1(2n isomer)	Lipids	LPC	-	1	1239000	978990	898330	951620	864680	852230	896020	911520	898310	1016700	810860	938800	1551700	1583300	2025700	1382600	1278000	1248400	1276500
pmp001270	494.32	184.07	493.317	C24H48NO7P	[M+H]+	LysoPC 16:1	Lipids	LPC	76790-27-7	1	3098000	2504500	2260400	2378700	2156300	2177300	2132200	2047500	1982000	2634800	2674400	2864300	3602900	3533200	3067200	2838900	2889400	2997000	2781000
HJAP005	495.11	333.07	494.105	C22H22O13	[M+H]+	Laricitrin-3-O-glucoside	Flavonoids	Flavonoid	39986-90-8	3	102830	95473	126220	206250	201190	122280	82058	61660	80029	23455	19032	18441	153970	199810	102250	133020	106990	138890	122680
pmb0855	496.34	184.07	495.332	C24H50NO7P	[M+H]+	LysoPC 16:0	Lipids	LPC	17364-16-8	1	8794800	8185100	7299100	8437000	8295400	8732900	9776200	10134000	9951300	10535000	10289000	10461000	9983500	10119000	9963100	8489200	9016700	9357600	9784700
pmd0132	496.34	184.07	495.332	C24H50NO7P	[M+H]+	LysoPC 16:0(2n isomer)	Lipids	LPC	-	1	787590	820820	674210	815960	769410	754710	885870	890150	881470	853490	914320	1002100	873130	868420	857390	854390	879760	871730	837530
pmb0745	497.14	331.08	496.137	C26H24O10	[M+H]+	Tricin-4'-O-syringyl alcohol	Flavonoids	Flavonoid	-	1	3486700	2679400	2685600	4522300	3680700	3662400	1689700	1418200	1670200	1554600	1680500	1445400	2673800	2910100	2901200	2475400	2556800	2878100	2624000
Lmhp009349	502.29	361.27	501.286	C25H44NO7P	[M+H]+	LysoPE 20:4(2n isomer)	Lipids	LPE	-	3	3290.4	1941.7	2845.4	3266	5086	2913.2	2243.7	2313.1	2541	5231	5240.6	3747.6	3967.7	5529.7	3434.9	2090.5	2386.7	2386.8	2165.1
pme0500	503.16	323	504.169	C18H32O16	[M-H]-	D-Melezitose	Others	Saccharides and Alcohols	597-12-6	1	366020	254230	497610	532310	339450	539440	432630	274990	295300	271860	321210	355480	333800	392210	415940	289120	296210	353000	256070
MWS0442	527.16	365.1	504.169	C18H32O16	[M+Na]+	Maltotriose	Others	Saccharides and Alcohols	1109-28-0	2	1656500	2040400	1490000	1625200	2180700	1752800	1605700	1953700	1673300	1877700	1499800	2695300	1891800	1654900	1588800	1550700	2067200	1686900	1787100
pme2125	503.16	179	504.169	C18H32O16	[M-H]-	Raffinose*	Others	Saccharides and Alcohols	512-69-6	3	4899300	2657600	4092700	3542800	4008300	3122800	2939800	3653900	2216900	2949700	4150900	2375400	3744500	4207100	4209600	3608500	2835600	3148900	3918600
mws1589	503.16	179	504.169	C18H32O16	[M-H]-	D-Panose*	Others	Saccharides and Alcohols	33401-87-5	1	1205300	1215300	1308800	1594200	1158400	1138400	845540	925190	823980	918610	1122900	972050	1146800	1721500	1069100	903800	983810	1013400	1196300
MWSmce486	503.16	383.12	504.169	C18H32O16	[M-H]-	Manninotriose	Others	Saccharides and Alcohols	13382-86-0	3	52078	117340	21224	322500	32862	212760	66275	25505	184710	22484	11941	23908	49301	55679	57832	52561	60786	44152	56926
Hmqp000191	505.18	127.03	504.17	C18H32O16	[M+H]+	Planteose	Others	Saccharides and Alcohols	470-57-5	2	63222	78829	66547	87902	83901	85615	59344	38080	62298	79046	56318	65581	49974	72454	49219	41738	56251	54321	43338
Lmhp008718	506.32	184.07	505.317	C25H48NO7P	[M+H]+	LysoPC 17:2	Lipids	LPC	-	1	182260	121620	112770	92321	91111	83875	91233	89855	114380	227220	203190	238520	160600	130360	151530	129680	153240	139160	136350
Lmhp010757	506.32	365.31	505.317	C25H48NO7P	[M+H]+	LysoPE 20:2	Lipids	LPE	-	3	17721	18549	15422	16735	17014	15990	19370	21994	18827	16898	18078	16957	22977	26223	23292	18413	19173	23472	19552
Lmhp010514	506.32	365.31	505.317	C25H48NO7P	[M+H]+	LysoPE 20:2(2n isomer)	Lipids	LPE	-	3	17426	16248	14427	18436	13599	17884	13697	19206	21762	16532	14442	16241	22723	21364	19631	17642	18358	20274	21583
pmp000013	507.15	345.09	506.142	C24H26O12	[M+H]+	Eupatilin-7-O-glucoside	Flavonoids	Flavonoid	-	2	59306	42042	58488	96707	92761	94335	37607	37063	41694	21449	21240	24647	69777	63520	63145	54212	61145	57509	60645
Lmhp009590	508.34	184.07	507.332	C25H50NO7P	[M+H]+	LysoPC 17:1	Lipids	LPC	-	1	195620	177040	167560	171690	160010	154760	183620	181640	201110	265290	236140	256080	214700	226860	234080	165230	186860	208830	197820
Hmcp002187	509.13	347.07	508.121	C23H24O13	[M+H]+	Limocitrin-3-O-galactoside	Flavonoids	Flavonoid	-	1	340910	324970	289330	630500	577850	743360	367450	152530	216710	102890	92254	53284	390460	370230	310070	320040	370260	328260	367420
Zmjp004852	509.13	347.08	508.122	C23H24O13	[M+H]+	5,6,3′,4′-Tetrahydroxy-3,7-dimethoxyflavone-6-O-glucoside	Flavonoids	Flavonoid	-	1	73732	37449	58632	93809	97425	100260	39317	23944	23261	11333	7036.2	7746.2	54760	50059	32404	53988	42288	44276	38916
HJAP006	509.13	347.08	508.122	C23H24O13	[M+H]+	Syringetin-7-O-glucoside	Flavonoids	Flavonoid	-	1	363270	291810	323260	701940	579640	829760	396350	158560	178340	117160	88484	74197	424630	355180	355560	373320	345090	364330	396430
pmb2406	510.36	184.07	509.348	C25H52NO7P	[M+H]+	LysoPC 17:0	Lipids	LPC	50930-23-9	2	395500	379910	330330	451750	477300	505790	777010	778840	792010	706020	699260	751590	489150	550320	551160	449850	460300	491460	471390
Lmhp010515	510.36	184.07	509.348	C25H52NO7P	[M+H]+	LysoPC 17:0(2n isomer)	Lipids	LPC	-	3	130470	126040	105590	147180	138010	127050	238390	236200	241900	238480	211450	217420	171310	156300	166030	148270	147410	138140	174350
pmb1466	511.12	331.08	510.116	C26H22O11	[M+H]+	Tricin-4'-O-syringic acid	Flavonoids	Flavonoid	-	2	31419	20197	27568	34761	27078	22858	12213	8272.4	13433	19882	12696	11031	19233	26579	19662	19752	25918	24118	24259
Lmhp009526	515.32	261.22	514.314	C27H46O9	[M+H]+	2-α-Linolenoyl-glycerol-1-O-glucoside	Lipids	Glycerol ester	-	3	7750.1	6048.9	8189.4	3971.8	4403	6972.2	3344.7	2394.9	3467.3	2691.8	3329	6491.9	5071	5364.8	2384.9	4951.7	2546	7310.1	6983
Lmhp009773	515.32	261.22	514.314	C27H46O9	[M+H]+	1-α-Linolenoyl-glycerol-3-O-glucoside	Lipids	Glycerol ester	-	3	9023	5954.4	12094	4294.7	4325.9	5047.6	1438.1	3676.2	2587.3	4310.6	5704.3	5682	1341.4	5309.7	4177	3804.4	4501.3	2193.4	5157
Hmqp006235	516.3	184.07	515.297	C26H46NO7P	[M+H]+	LysoPC 18:4	Lipids	LPC	-	3	7709.7	3807.7	4926.2	5221.2	3370.4	3380.2	3647.6	3083.8	2435.8	7629.9	5958	7318.6	8363.9	10603	8661.2	8681.5	7613.4	10292	10181
Lmhp010573	517.34	263.24	516.33	C27H48O9	[M+H]+	1-Linoleoylglycerol-3-O-glucoside	Lipids	Glycerol ester	-	2	104950	105950	90020	101020	95380	89850	44038	67229	43554	59009	55731	76433	58524	83370	69008	74508	79264	70793	58608
Lmhp010334	517.34	263.24	516.33	C27H48O9	[M+H]+	2-Linoleoylglycerol-1-O-glucoside	Lipids	Glycerol ester	-	2	115850	81157	93571	85465	105220	88609	48670	62746	45670	63792	52840	61976	62612	66359	87172	64632	78440	66353	56540
pmb0865	518.32	184.07	517.317	C26H48NO7P	[M+H]+	LysoPC 18:3(2n isomer)	Lipids	LPC	-	1	14943000	12128000	10467000	7949800	6916200	7925900	4823700	5785100	5379400	17093000	15329000	16612000	14945000	14898000	13762000	13930000	14328000	15089000	15405000
pmb0854	518.32	184.07	517.317	C26H48NO7P	[M+H]+	LysoPC 18:3	Lipids	LPC	-	1	14393000	11508000	10263000	7670200	7170300	7929500	4798600	5818900	5379100	16481000	15445000	17002000	14957000	15345000	13158000	13408000	14425000	15204000	15298000
pmp000702	536.19	195.06	518.137	C22H30O14	[M+NH4]+	3'-O-D-glucosylgentiopicroside	Terpenoids	Sesquiterpenoids	-	2	235430	154810	105330	115450	97496	75332	49158	51648	162920	131560	100790	91242	34856	53271	46631	98853	83348	82064	105500
Hmbn002692	517.16	175.04	518.164	C22H30O14	[M-H]-	6'-O-Feruloyl-D-sucrose	Phenolic acids	Phenolic acids	118230-77-6	3	1455700	1799200	1491500	2157000	2225500	2184000	1325100	1265300	1329100	1503000	1226500	1336700	949820	893610	852450	1123000	1026100	993420	1132800
pmp001251	520.34	184.07	519.332	C26H50NO7P	[M+H]+	LysoPC 18:2(2n isomer)	Lipids	LPC	-	1	779710	683790	630350	557060	567460	529350	444650	501420	473250	783620	723780	771620	815370	792900	746190	734310	740640	697660	768610
pmp001273	520.34	184.07	519.332	C26H50NO7P	[M+H]+	LysoPC 18:2	Lipids	LPC	-	1	13218000	11849000	10620000	10281000	9921400	10014000	7611700	8207900	8965300	13003000	13347000	15231000	14878000	13714000	12329000	11651000	12015000	12286000	12693000
pmn001378	519.19	357.14	520.194	C26H32O11	[M-H]-	Pinoresinol-4-O-glucoside	Lignans and Coumarins	Lignans	41607-20-9	2	6951.5	9564.2	6050.8	11141	19194	11854	641.5	5094.8	3202	7307.2	4476.2	4510	28443	15406	12799	22614	19948	19428	18420
Lmsn008066	519.33	457.33	520.34	C30H48O7	[M-H]-	1β,2α,3α,19α,23-Pentahydroxyurs-12-en-28-oic acid	Terpenoids	Triterpene	-	3	4822.4	4247.8	3563.8	6201.5	6161	8091	6414.7	6709.5	5864.7	5405.1	4341	6271.7	8391.8	6356.3	7518.5	6671.9	10482	8434.7	8253
Lmhp010190	522.36	184.07	521.348	C26H52NO7P	[M+H]+	LysoPC 18:1(2n isomer)	Lipids	LPC	-	1	240200	202630	182230	248490	225240	269910	211270	252160	272780	244380	229830	242160	291650	311780	293360	269620	269360	238320	264820
pmp001281	522.36	184.07	521.348	C26H52NO7P	[M+H]+	LysoPC 18:1	Lipids	LPC	-	1	4763200	4545000	4301900	5626900	4552000	5591600	5325700	5891900	6644500	5126700	4820500	5231300	5995400	7485200	7040800	4678800	4951700	5752400	5872700
pmb3041	521.09	329.2	522.101	C23H22O14	[M-H]-	Tricin-7-O-saccharic acid	Flavonoids	Flavonoid	-	2	13004	10509	4951.2	27946	16717	38418	9292.5	8671.5	8090.5	9263.8	9313.8	1859	40016	24763	18007	27767	31570	47003	33807
Cmsp005051	523.23	137.06	522.21	C26H34O11	[M+H]+	Isolariciresinol-9-O-glucoside	Lignans and Coumarins	Lignans	-	2	32897	35037	27942	67755	45655	54261	23728	24504	15552	40533	35608	27735	93861	52463	59734	53664	78408	41838	65398
mws0126	524.37	184.07	523.364	C26H54NO7P	[M+H]+	LysoPC 18:0	Lipids	LPC	19420-57-6	2	9913500	8953500	7918300	14490000	13474000	14733000	21084000	23637000	22873000	15080000	15560000	17073000	12365000	13629000	14342000	11184000	11670000	12278000	12447000
pmd0136	524.37	184.07	523.364	C26H54NO7P	[M+H]+	LysoPC 18:0(2n isomer)	Lipids	LPC	-	1	3076000	2756100	2559800	4330600	4226600	4629200	6642700	7121200	7178700	5051600	4971200	5439400	4092400	4416800	4698000	3638100	3749100	3961700	4164800
pmb3053	523.12	329.2	524.132	C27H24O11	[M-H]-	Tricin-4'-O-eudesmic acid	Flavonoids	Flavonoid	-	1	645300	445560	461950	693710	481860	461000	356200	321320	376630	590200	604810	581960	581490	635280	619190	618130	690950	571510	671450
Lmtn003096	523.21	361.14	524.226	C26H36O11	[M-H]-	Secoisolariciresinol 4-O-glucoside	Lignans and Coumarins	Lignans	-	2	10532	8863.8	13436	19687	27366	27082	4746.8	4102	12883	11973	16596	7008.5	67646	60017	38063	50029	59752	60818	42886
pmp000235	527.15	331.08	526.148	C27H26O11	[M+H]+	Salcolin B	Flavonoids	Flavonoid	-	1	14943000	12266000	11346000	23268000	14915000	14697000	11184000	8664500	9895900	14265000	13626000	12998000	16824000	17534000	16347000	16526000	16729000	16990000	17442000
pmb0746	527.15	331.08	526.148	C27H26O11	[M+H]+	Tricin-4'-O-(guaiacylglycerol)ether	Flavonoids	Flavonoid	-	1	14847000	12178000	11593000	22881000	15232000	15884000	11220000	8794500	10722000	14088000	14047000	13639000	16609000	19034000	17309000	16301000	16441000	16869000	17582000
pmp000234	527.15	331.08	526.148	C27H26O11	[M+H]+	Salcolin A	Flavonoids	Flavonoid	-	1	14514000	11953000	11526000	20661000	15017000	15138000	11068000	8614200	10384000	12681000	13769000	13539000	16372000	18141000	16926000	16550000	15993000	16901000	16211000
pmb0717	527.15	331.08	526.148	C27H26O11	[M+H]+	Tricin-5-O-guaiacylglycerol	Flavonoids	Flavonoid	-	1	76118	104360	93527	186840	95822	204660	49174	32491	38262	8607	4969.8	5318.5	129300	66298	98499	62641	76167	128580	63227
pmb2833	529.16	193.1	530.164	C23H30O14	[M-H]-	3-O-Feruloylquinic acid-O-glucoside*	Phenolic acids	Phenolic acids	-	2	4926.5	4513.6	5142.7	3279.7	1513	9445.7	1624.1	1021.2	2258.3	2253.7	1633.3	3705.9	6555.9	9132	2448.1	5260.6	3892.6	1850.4	4299.8
pmb2554	529.16	193.1	530.164	C23H30O14	[M-H]-	5-O-Feruloyl quinic acid glucoside*	Phenolic acids	Phenolic acids	-	2	5158.1	4521.4	9	4696.7	5762.7	7437.4	9	9	2249.3	1529.7	4299.1	1031.6	3482	3080.8	3591	5155.2	5550	2259.6	4302.9
Lmhp008924	532.34	184.07	531.332	C27H50NO7P	[M+H]+	LysoPC 19:3	Lipids	LPC	-	2	5636.4	11069	5148.9	6518.5	5997.7	5148.3	5715.3	5307.6	4485.3	7757.2	9040	7969.2	7387	8572.7	10991	3959.8	5304.3	5845.5	7526.6
Lmhp007598	534.36	184.07	533.348	C27H52NO7P	[M+H]+	LysoPC 19:2(2n isomer)	Lipids	LPC	-	2	21522	21080	22094	22954	23249	21147	27805	29076	33230	28501	29814	28158	24459	33114	28247	25891	26788	25266	23390
Lmhp007840	534.36	184.07	533.348	C27H52NO7P	[M+H]+	LysoPC 19:2	Lipids	LPC	-	2	13093	10276	11396	17377	17218	18084	26253	31846	30622	13315	10899	10309	26287	28392	25489	20919	20236	13515	17595
pmp001110	535.14	517.13	534.137	C25H26O13	[M+H]+	Apigenin-6-C-xyloside-8-C-arabinoside*	Flavonoids	Flavonoid carbonoside	-	1	260140	308860	259460	426190	453130	424400	239070	236080	309770	176390	167870	139510	163830	223570	180860	173560	120940	169160	204180
Lmtp002942	535.14	499.12	534.137	C25H26O13	[M+H]+	Apigenin-6,8-di-C-arabinoside*	Flavonoids	Flavonoid carbonoside	-	1	787570	910540	801950	1052000	1414100	1347600	795730	644960	700940	472950	412400	430400	514290	478730	461470	400570	514870	536270	483170
Lmtp002822	535.14	499.12	534.137	C25H26O13	[M+H]+	Apigenin-6-C-arabinoside-8-C-xyloside*	Flavonoids	Flavonoid carbonoside	-	1	723990	777630	827750	1335600	1459900	1340100	699270	784210	677220	456620	463410	458440	574030	594960	492600	447890	496300	507580	550920
Lmhp010908	536.37	184.07	535.364	C27H54NO7P	[M+H]+	LysoPC 19:1	Lipids	LPC	-	3	60684	55651	61603	104780	115240	176690	236850	209640	377660	75571	86785	92755	93931	210350	157340	98322	104870	114440	100590
Zmfn000481	535.04	323.03	536.044	C14H22N2O16P2	[M-H]-	Uridine-5'-Diphosphate-D-Xylose	Nucleotides and derivatives	Nucleotides and derivatives	3616-06-6	3	12033	11534	9769.9	7890.3	4283.3	7910.4	6896.8	3556.9	7145.8	26103	26355	36791	7372	5145.3	5340.8	11568	9089.4	5534.5	10509
Zmcn003729	535.18	373.13	536.189	C26H32O12	[M-H]-	1-Hydroxypinoresinol-4'-O-Glucoside	Lignans and Coumarins	Lignans	-	3	6019.2	5460.2	6636.5	9850.5	5485.2	3020.5	4885.8	4218	1799.8	13865	8582.5	3318	22836	16883	12811	16218	9012	10002	15927
pmb2228	538.39	184.07	537.379	C27H56NO7P	[M+H]+	LysoPC 19:0	Lipids	LPC	108273-88-7	3	638440	517390	407200	418280	422710	401950	237390	302960	279840	675980	625680	641140	695780	685860	579810	552980	588840	612150	613730
Lmhp008742	542.32	184.07	541.317	C28H48NO7P	[M+H]+	LysoPC 20:5	Lipids	LPC	162440-04-2	2	2648.6	9	9	80976	1637.9	2397.3	2530.9	3030.5	9	2135.1	4165.7	4671.5	9	1394.7	1262.1	15310	14153	14886	12605
pmc0960	544.34	184.07	543.332	C28H50NO7P	[M+H]+	LysoPC 20:4	Lipids	LPC	-	3	6586.7	5622.3	3946.9	11243	8506.2	6058.6	18966	15962	31152	13502	15495	18940	11612	14979	8184.5	8408.8	8641.5	8795.4	12013
Lmhp009890	546.36	184.07	545.348	C28H52NO7P	[M+H]+	LysoPC 20:3	Lipids	LPC	1199257-41-4	2	9271.7	6407.6	8366.6	23843	9965.5	11236	29329	15558	44031	22118	17286	21864	13747	29533	29439	19061	21484	22031	16038
pmd0146	548.37	184.07	547.364	C28H54NO7P	[M+H]+	LysoPC 20:2(2n isomer)	Lipids	LPC	-	3	245240	198780	174180	199460	166930	181530	247970	253000	272590	187160	151540	170750	280530	294690	266090	207170	204560	242510	244170
pmd0147	548.37	184.07	547.364	C28H54NO7P	[M+H]+	LysoPC 20:2	Lipids	LPC	-	3	242810	207000	182410	192860	177820	193330	275080	262600	274560	198520	176220	189850	274840	310450	284340	201610	230530	232340	254120
pmb0608	549.12	301.4	548.117	C25H24O14	[M+H]+	Chrysoeriol-7-O-(6''-malonyl)glucoside	Flavonoids	Flavonoid	-	2	5471.7	4063.5	12271	10734	15193	13688	5924.5	8110.7	3329.1	15922	5482.6	8817.8	18972	23328	12572	18340	16312	10394	19241
Lmsn003628	547.17	223.06	548.174	C23H32O15	[M-H]-	6′-O-Sinapoylsucrose	Phenolic acids	Phenolic acids	-	3	525480	856510	708580	711330	839550	794450	547770	587280	483760	902140	761170	896540	547770	495100	541160	661920	623490	543850	519810
pmn001671	547.17	223.1	548.174	C23H32O15	[M-H]-	Furanofructosyl-α-D-(6-mustard acyl)glucoside	Phenolic acids	Phenolic acids	-	2	946440	766080	941970	766840	911970	889710	660000	648110	582900	876270	960360	983090	663690	684200	569780	648690	597510	609530	656110
pmn001672	547.17	223.1	548.174	C23H32O15	[M-H]-	Furanofructosyl-α-D-(3-mustard acyl)glucoside	Phenolic acids	Phenolic acids	-	1	39374	30758	31609	17654	29988	29568	25768	32257	9206.2	39700	50470	54355	50417	47056	36355	41577	43758	32702	33662
Lmhp011549	550.39	184.07	549.379	C28H56NO7P	[M+H]+	LysoPC 20:1	Lipids	LPC	-	1	310120	305660	265850	452620	453700	396020	653010	671370	721880	218580	209740	232990	395800	413170	456070	305060	323950	319230	331540
pmd0143	552.4	184.07	551.395	C28H58NO7P	[M+H]+	LysoPC 20:0	Lipids	LPC	108341-80-6	3	66085	48174	50984	47249	48934	46092	96081	65210	75300	126450	113760	102610	72055	89417	63451	65535	60879	64578	67233
pmd0142	552.4	184.07	551.395	C28H58NO7P	[M+H]+	LysoPC 20:0(2n isomer)	Lipids	LPC	-	3	1906.3	2781.5	3558.8	4388.8	3564.7	4708.9	8044.1	9024.7	10651	226.99	1362.3	1290.2	3811.4	5616	7366.1	5242.1	3136.8	5286.4	3651.1
pmb3032	561.12	329.1	562.132	C26H26O14	[M-H]-	Tricin-7-O-(2''-Malonyl)rhamnoside	Flavonoids	Flavonoid	-	1	410100	383860	317850	600620	416310	402430	294070	246650	288660	432540	480060	450040	508540	611350	548210	547350	520960	501290	527970
mws1292	565.16	409.09	564.123	C26H28O14	[M+H]+	Isoschaftoside	Flavonoids	Flavonoid carbonoside	52012-29-0	1	750820	668270	702690	756240	630250	622780	492630	536670	521220	561200	572420	559650	521160	621420	509250	504800	501160	532340	552330
Lmnp102580	565.16	433.11	564.148	C26H28O14	[M+H]+	Apigenin-6-C-(2''-xylosyl)glucoside	Flavonoids	Flavonoid carbonoside	-	2	8131.6	16400	12652	16168	22047	9816.8	5645.8	4248	2818	14511	7768	1065.2	18318	10546	13389	16213	15961	11976	9850.5
Lmtp002474	565.16	427.1	564.148	C26H28O14	[M+H]+	Apigenin-6-C-(2''-glucosyl)arabinoside	Flavonoids	Flavonoid carbonoside	-	3	697740	646600	673260	830640	800010	762210	477720	485100	501520	590590	637900	567220	608750	551710	603870	462000	521520	527630	598420
Lmtp002642	565.16	457.11	564.148	C26H28O14	[M+H]+	Apigenin-8-C-(2''-glucosyl)arabinoside	Flavonoids	Flavonoid carbonoside	-	1	1216500	1025500	1194000	1089400	1138300	1183000	783530	776080	786720	828810	782640	833400	912120	871150	847510	738620	798880	739570	843250
pmp000411	565.16	433.1	564.148	C26H28O14	[M+H]+	Genistein-8-C-apiosyl(1→6)glucoside	Flavonoids	Isoflavones	-	2	229080	239720	223340	205290	215850	231970	178510	186050	133180	209890	175530	173350	168830	168470	149930	158260	162590	157470	183360
pmf0472	565.16	271.1	564.148	C26H28O14	[M+H]+	Apiin	Flavonoids	Flavonoid	26544-34-3	3	12862	16368	9250	13575	14285	22191	13631	11414	12492	19190	10079	9336.5	27808	13644	17868	22192	15767	12190	14293
pmb2922	565.05	323.1	566.055	C15H24N2O17P2	[M-H]-	Uridine 5'-diphospho-D-glucose	Nucleotides and derivatives	Nucleotides and derivatives	133-89-1	2	41652	34669	41836	11809	5661	11801	37695	24074	38200	129640	128440	191000	7290	25633	41748	39955	32251	19905	38856
Zmzp006857	569.16	331.08	568.158	C29H28O12	[M+H]+	Tricin-4'-O-[β-guaiacyl-(9''-O-acetyl)glycerol]ether	Flavonoids	Flavonoid	-	1	25476	29380	20612	42429	52829	45527	27764	36648	34034	18783	15337	13375	48374	54660	107330	97450	94285	93191	102540
Zmxp005470	579.13	331.08	578.127	C26H26O15	[M+H]+	Tricin-7-O-(6''-O-malonyl)glucoside	Flavonoids	Flavonoid	-	1	41572	51273	106420	162100	104080	124170	76733	45738	68612	130290	112320	71551	245350	209120	164070	132530	106330	103410	118850
Lmpp003930	579.15	271.06	578.142	C30H26O12	[M+H]+	Apigenin-7-O-(6''-p-Coumaryl)glucoside	Flavonoids	Flavonoid	-	3	370680	293920	244130	568310	455970	565930	129380	115070	169000	79503	101230	86653	214450	222540	189240	302970	294540	373370	318440
pme0436	577.14	407.1	578.142	C30H26O12	[M-H]-	Procyanidin B3	Tannins	Proanthocyanidins	23567-23-9	1	9	9	9	9	9	108990	9	9	9	4253500	4339000	3792900	9	9	9	293030	209900	208990	247470
mws0836	577.14	425.1	578.142	C30H26O12	[M-H]-	Procyanidin B1	Tannins	Proanthocyanidins	20315-25-7	1	9	9	9	9	9	91962	9	9	9	3519200	3490300	3475000	9	9	9	221920	191510	157000	198320
pme0368	579.17	271.01	578.164	C27H30O14	[M+H]+	Apigenin-7-O-rutinoside (Isorhoifolin)	Flavonoids	Flavonoid	552-57-8	1	297770	258040	263140	575800	441950	600900	145850	95688	178280	56400	86851	52287	217220	202030	197810	300240	330160	308010	329860
Lmgp004474	579.17	271.06	578.164	C27H30O14	[M+H]+	Genistein-7-O-galactoside-rhamnose	Flavonoids	Isoflavones	-	1	310900	269360	292310	561260	500330	526710	146130	118190	130830	69660	68394	49552	247890	174100	191080	272960	286460	365980	300570
MWSmce498	579.17	271.07	578.164	C27H30O14	[M+H]+	Rhoifolin	Flavonoids	Flavonoid carbonoside	17306-46-6	3	266500	260790	262300	583770	480200	552020	94323	101660	113890	86194	80510	62509	199970	199980	184280	280670	324260	299380	332850
pme3227	579.17	433	578.164	C27H30O14	[M+H]+	Vitexin-2''-O-rhamnoside	Flavonoids	Flavonoid carbonoside	64820-99-1	2	11358	8525.2	5712	6386.5	9318	18242	2840	6392	3556	9	9	7092	21347	9653.2	12110	16728	11386	10667	12819
Zmjp003179	581.15	449.11	580.142	C26H28O15	[M+H]+	Orientin-2''-O-xyloside	Flavonoids	Flavonoid	-	3	34340	27532	36735	47992	67779	44148	22177	22185	22876	21937	25336	17629	27216	24709	9377.2	15658	16928	14604	16312
pmb0636	581.15	431.3	580.143	C26H28O15	[M+H]+	Orientin-7-O-arabinoside	Flavonoids	Flavonoid carbonoside	-	2	40500	32200	44868	48658	50933	68410	16726	32449	24400	25201	26479	23643	25632	25518	14932	17879	22802	29957	24452
pmb0631	581.15	515.4	580.143	C26H28O15	[M+H]+	Orientin-6-C-arabinoside	Flavonoids	Flavonoid carbonoside	-	2	76147	75803	95252	113130	135040	97026	47438	59972	53367	43306	52733	69680	70340	68160	33694	42712	37979	46268	58949
pmp000398	581.19	419.13	580.179	C27H32O14	[M+H]+	Liquiritigenin-7,4'-O-diglucoside	Flavonoids	Dihydroflavone	-	2	32006	19876	32599	65372	59176	58218	32037	7785.8	16306	21199	19548	17760	57661	73235	44115	41140	39018	50465	66122
Zmhn001446	579.21	417.16	580.216	C28H36O13	[M-H]-	syringaresinol-4'-O-glucopyranosid	Lignans and Coumarins	Lignans	-	2	2491	9986	7553.2	4392.8	5066	11826	8245.8	6925.8	15070	16230	7585.2	8947.8	3730.5	11946	6308.5	8083.5	11453	11293	14515
Xmzn007677	580.36	506.33	581.264	C33H35N5O5	[M-H]-	Ergotamine	Alkaloids	Alkaloids	113-15-5	3	20967000	18736000	17831000	20082000	20156000	20505000	19929000	21863000	23068000	22719000	23254000	24097000	27565000	27779000	25116000	26887000	26008000	22617000	26100000
pmb0492	584.28	325	583.268	C34H37N3O6	[M+H]+	N',N'',N'''-p-Coumaroyl-cinnamoyl-caffeoyl spermidine	Alkaloids	Phenolamine	-	2	17322	16518	10372	50313	50002	50430	37740	38201	37943	20401	13494	23059	26964	31741	17465	14918	20778	19437	19916
pmb2936	591.17	367.2	592.179	C28H32O14	[M-H]-	Disinapoyl glucoside	Phenolic acids	Phenolic acids	-	2	3928.5	3389.3	8178.3	3879.7	7297.2	6266.1	1433.2	9	1956	2041.7	3265.8	1126.4	3665.9	9	9	2886	4078.1	2128.6	2243.7
pmp000239	595.13	505.09	594.122	C26H26O16	[M+H]+	Luteolin-6-C-(5''-glucuronyl)xyloside	Flavonoids	Flavonoid	-	2	23406	13649	22486	16806	19548	22964	7878.5	11618	4784.5	33062	22866	36121	6191	17908	10885	6865.8	10240	10257	11965
Zmjp003291	595.17	433.12	594.158	C27H30O15	[M+H]+	"Vitexin-2""-O-galactoside"	Flavonoids	Flavonoid	-	3	751540	589150	767240	2536400	2038000	2466600	415490	275990	317810	391080	281240	291970	1596900	1280600	1334100	1364100	1571900	1773500	1660900
MWSHY0061	595.16	287.06	594.158	C27H30O15	[M+H]+	Kaempferol-3-O-neohesperidoside	Flavonoids	Flavonols	32602-81-6	2	120590	91054	115990	159960	154160	180900	79647	49136	63653	58786	30117	46960	159590	105440	114230	126510	112040	120460	154440
pme1605	593.15	285	594.158	C27H30O15	[M-H]-	Kaempferol-3-O-robinobioside(Biorobin)	Flavonoids	Flavonols	17297-56-2	1	39598	38332	38916	58166	81354	76825	39706	44700	25790	56092	34728	39344	37799	24852	27449	37996	20670	34783	27437
MWSHY0080	595.17	287.06	594.158	C27H30O15	[M+H]+	Luteolin-7-O-neohesperidoside (Lonicerin)	Flavonoids	Flavonoid	25694-72-8	2	115440	80386	135240	175600	177980	178900	74582	25702	70290	46274	58060	40461	148890	115630	113400	115420	99098	117180	112240
Lmsp004670	595.17	287.06	594.158	C27H30O15	[M+H]+	Kaempferol-3-O-glucoside-7-O-rhamnoside	Flavonoids	Flavonols	-	2	140000	120970	118070	152510	149080	168290	71905	41778	63778	45553	36092	30168	121440	117930	106880	123670	108990	111760	146690
Lmsn002815	593.15	285.04	594.158	C27H30O15	[M-H]-	Kaempferol-3-O-rutinoside(Nicotiflorin)*	Flavonoids	Flavonoid	17650-84-9	1	17571	17251	17210	24419	22377	32899	8268.2	5046	6903.5	6337.2	11514	10148	24569	24102	21917	31492	27803	19887	27911
Hmmp003156	595.16	313.07	594.158	C27H30O15	[M+H]+	Saponarin(Isovitexin-7-O-glucoside)	Flavonoids	Flavonoid	20310-89-8	3	362210	286260	379750	1412700	1183400	1224900	201160	176220	136270	166910	132480	158990	932420	744930	674100	764940	1209300	853470	929050
Lmnp002413	595.17	449.11	594.158	C27H30O15	[M+H]+	Luteolin-6-C-rhamnoside-7-O-glucoside	Flavonoids	Flavonoid carbonoside	-	3	26414	32091	25210	36054	73645	56266	25960	33882	20916	35320	40619	27569	24634	30330	16221	24518	10102	18064	23800
Lmlp002990	595.17	313.07	594.158	C27H30O15	[M+H]+	Isosaponarin(Isovitexin-4'-O-glucoside)	Flavonoids	Flavonoid carbonoside	19416-87-6	3	462840	361030	417770	1687300	1429600	1442200	262470	153780	178750	162560	172240	172150	1116900	772990	707820	985800	1062100	985560	1097700
pmp000593	595.17	449.1	594.158	C27H30O15	[M+H]+	Luteolin-7-O-rutinoside*	Flavonoids	Flavonoid	3563-98-2	2	29734	33883	18744	44354	60744	59877	30343	25235	47711	27385	37000	39902	33316	14428	12969	11548	23109	13706	19532
MWSslk146	595.17	433.12	594.158	C27H30O15	[M+H]+	4'-O-Glucosylvitexin	Flavonoids	Flavonoid carbonoside	38950-94-6	3	727840	579660	723140	2632500	2146000	1999500	405140	309880	325840	313940	253900	281320	1722000	1273200	1266600	1556800	1422100	1476000	1564900
MWSslk254	595.17	287.06	594.158	C27H30O15	[M+H]+	Kaempferol-3-O-glucorhamnoside	Flavonoids	Flavonols	40437-72-7	2	108210	82008	127650	192290	186960	170150	65101	46182	70371	43352	52812	31687	173480	132640	115910	95974	102380	130840	128220
Lmqn000780	606.08	384.98	607.082	C17H27N3O17P2	[M-H]-	Uridine 5'-diphospho-N-acetylglucosamine	Alkaloids	Alkaloids	528-04-1	1	100320	80573	95533	27378	25939	39275	144880	82645	181230	222860	229890	267400	52861	81747	128310	75284	95930	70367	66935
mws1661	609.18	301	608.174	C28H32O15	[M+H]+	Diosmetin-7-O-rutinoside (Diosmin)*	Flavonoids	Flavonoid	520-27-4	1	1265300	979510	1010600	1808400	1521600	1769500	588750	619970	576150	311020	272730	223080	729780	709130	686870	816850	880090	702630	1004400
pmb3002	607.17	299	608.174	C28H32O15	[M-H]-	Chrysoeriol-7-O-rutinoside	Flavonoids	Flavonoid	-	1	323570	297650	339590	452770	505800	400870	382390	406120	315560	127210	180670	228080	192310	173930	209480	234540	211720	155510	228440
pmp001080	609.18	463.12	608.174	C28H32O15	[M+H]+	Diosmetin-7-O-Neohesperidoside (Neodiosmin)*	Flavonoids	Flavonoid	38665-01-9	1	545330	599620	544430	673340	833230	718490	490230	543480	462690	305890	311940	328720	329130	276870	371140	342270	254900	288870	362680
Hmgp002121	609.18	463.08	608.176	C31H28O13	[M+H]+	Hispidulin-7-O-(6''-O-p-Coumaroyl)Glucoside	Flavonoids	Flavonoid	-	3	698010	633860	591640	892300	966080	850280	613530	578520	520730	354270	291840	324390	367850	395540	418660	345840	339070	325240	370570
Lmjp002461	611.16	303.05	610.153	C27H30O16	[M+H]+	Quercetin-3-O-neohesperidoside	Flavonoids	Flavonols	117611-67-3	3	24080	29526	25794	42838	179000	41709	28038	17946	15060	26533	15158	27366	35314	19405	32334	41034	29440	30165	53911
mws0059	609.15	301	610.153	C27H30O16	[M-H]-	Quercetin-3-O-rutinoside (Rutin)	Flavonoids	Flavonols	153-18-4	1	5999.8	5461	13342	9133	48660	9797.5	1831.2	1224	1799.2	10196	3639.8	7297	8100.8	4858.8	1826.5	16206	10974	9124.5	10341
pmb0711	611.16	303.1	610.153	C27H30O16	[M+H]+	Quercetin-7-O-rutinoside	Flavonoids	Flavonols	147714-62-3	3	26637	19303	29374	33789	164820	49788	18715	25199	23672	23665	27438	26681	25129	23731	15080	25915	38208	35223	38876
Lmmp003091	611.16	303.05	610.153	C27H30O16	[M+H]+	Quercetin-3-O-(4''-O-glucosyl)rhamnoside	Flavonoids	Flavonols	59262-54-3	3	24854	29395	39780	34386	183060	45975	17259	16496	22946	40150	19877	18739	27393	20852	24334	30892	39439	33067	43122
pmb0624	611.16	431.3	610.153	C27H30O16	[M+H]+	Isoorientin-7-O-glucoside	Flavonoids	Flavonoid carbonoside	-	1	15426	9649.8	18687	27771	38084	24459	41213	11330	17566	8553.8	36960	5960.8	97328	63765	21058	33651	39992	26238	25632
Zmjp003031	611.16	449.11	610.153	C27H30O16	[M+H]+	Orientin-2''-O-galactoside	Flavonoids	Flavonoid	-	3	197830	90852	180720	369420	318710	287980	368550	96985	110120	97763	277080	74535	801200	533460	188540	266880	234310	221590	319180
pmn001583	609.15	300	610.153	C27H30O16	[M-H]-	Quercetin-3-O-robinobioside	Flavonoids	Flavonols	52525-35-6	2	10800	12164	3007.8	12785	67582	4876.8	3645	6716.8	3598.5	6592	10942	10314	4798	6107	4854.5	14405	10982	11567	10938
pme0001	609.18	301	610.19	C28H34O15	[M-H]-	Hesperetin-7-O-neohesperidoside(Neohesperidin)	Flavonoids	Dihydroflavone	13241-33-3	1	11288	8130.5	13113	8732.5	11852	6513	17737	6912.8	11033	32760	20327	25427	5625	5642.2	12458	16884	22522	20579	13723
MWS0132	611.15	306.07	612.152	C20H32N6O12S2	[M-H]-	Oxiglutatione	Amino acids and derivatives	Amino acids and derivatives	27025-41-8	1	190670	237300	229000	264370	254480	230180	294380	165150	184300	345960	382600	418610	238180	238920	210190	212100	240120	157630	181950
pmb0628	613.18	451.1	612.169	C27H32O16	[M+H]+	Eriodictyol-8-C-glucoside-4'-O-glucoside	Flavonoids	Dihydroflavone	-	2	4189	2503	13599	26328	22671	15979	24075	4159.2	9640.8	13926	13887	1861.5	32011	30843	9462.8	14965	10788	23566	15594
Rfmb26201	621.22	417.16	622.226	C30H38O14	[M-H]-	Syringaresinol-4'-O-(6''-acetyl)glucoside	Lignans and Coumarins	Lignans	-	3	3176	3143.9	6791.4	7309.8	1546.1	1528.3	4110.4	4124	4091.5	5798.8	9433.5	5665.7	2594.6	5718.8	5659.7	5197.5	6157	6675.7	5669.4
Hmjp002999	625.18	317.06	624.162	C28H32O16	[M+H]+	Isorhamnetin-3-O-rutinoside (Narcissin)	Flavonoids	Flavonoid	604-80-8	3	279520	183180	248650	389430	359180	373640	132430	75840	87906	97669	92345	66113	155360	252520	198010	225280	254990	252670	302260
Zmxp002867	625.17	301.07	624.168	C28H32O16	[M+H]+	Chrysoeriol-5,7-di-O-glucoside	Flavonoids	Flavonoid	-	3	21323	12752	16305	14908	15624	14908	13477	11334	12061	14870	9947	14207	14902	17394	9223	14172	18072	16683	15282
Lmnp002584	625.18	463.13	624.169	C28H32O16	[M+H]+	Hispidulin-8-C-(2''-O-glucosyl)glucoside	Flavonoids	Flavonoid carbonoside	-	3	352380	334780	417430	224230	343570	312920	410070	222300	240500	627580	798520	649800	381940	432420	280520	260510	327390	298930	351250
Lmsp004721	625.18	317.07	624.169	C28H32O16	[M+H]+	Tamarixetin-3-O-glucoside-7-O-rhamnoside	Flavonoids	Flavonoid	-	1	264170	231140	251740	442610	367930	391410	114260	76836	103090	56392	103550	66310	246560	195890	176730	244200	254480	242710	263210
MWSHY0064	625.17	317.07	624.169	C28H32O16	[M+H]+	Isorhamnetin-3-O-neohespeidoside	Flavonoids	Flavonols	55033-90-4	1	286530	197780	223050	369970	361720	378610	122160	93300	87353	102660	103090	74946	219740	250510	210060	248670	202310	237420	210390
Lmhp003217	625.17	317.06	624.169	C28H32O16	[M+H]+	2'-Hydoxy,5-methoxyGenistein-O-rhamnosyl-glucoside	Flavonoids	Isoflavones	-	1	221950	242470	267750	399140	380140	350120	126270	66299	115360	86170	93972	56600	263900	247740	185170	236260	226010	247500	278620
Lmmp002463	625.18	317.07	624.169	C28H32O16	[M+H]+	Sexangularetin-3-O-glucoside-7-O-rhamnoside	Flavonoids	Flavonols	-	1	261800	189600	263140	420790	328540	413170	113390	68276	94703	101230	84586	93680	250350	232990	198080	252240	238470	267400	267230
HJAP026	625.18	463.13	624.17	C28H32O16	[M+H]+	Chrysoeriol-6-C-glucoside-4'-O-glucoside	Flavonoids	Flavonoid	-	3	378060	315560	407020	252490	345570	349300	430900	209390	214670	593460	716060	722410	410480	385810	325210	293890	318150	330060	299490
pma2088	627.16	465	626.148	C27H30O17	[M+H]+	Quercetin-3,4'-O-di-glucoside	Flavonoids	Flavonols	29125-80-2	3	22127	19189	15226	28511	16615	22167	13851	11147	15877	9331.2	10928	7491.4	15195	18999	18630	15593	13319	21298	13654
Hmlp002975	639.15	493.1	638.139	C28H30O17	[M+H]+	Isorhamnetin-3-O-glucuronide-7-O-rhamnoside	Flavonoids	Flavonols	-	3	365770	439470	374700	536380	659950	513210	421960	392910	351100	198160	394530	188120	261250	233010	241660	204520	260220	206040	227560
Lmgp005868	639.17	301.07	638.164	C32H30O14	[M+H]+	Chrysoeriol-7-O-(6''-feruloyl)glucoside	Flavonoids	Flavonoid	-	3	11292	10168	10249	9150.1	10059	11919	9547.1	4845.1	6743.9	4759.2	4190.7	6213	7950.9	5917.2	6047	7757.5	3050.6	4897.5	3528.7
Hmgp003086	639.19	331.08	638.184	C29H34O16	[M+H]+	Tricin-7-O-rutinoside*	Flavonoids	Flavonoid	-	3	5112200	4878500	4320400	8344300	7370100	8549800	3238400	2815700	3154900	1772900	1652200	1847000	3689300	3065600	2450300	3825100	4123900	4003200	4029800
Lmgp004959	639.19	331.08	638.185	C29H34O16	[M+H]+	Tricin-7-O-neohesperidoside*	Flavonoids	Flavonoid	53766-40-8	1	4744700	4451400	4517800	9147000	8119300	8795100	3192900	2454400	3097500	2314700	1341800	1992800	3790600	3466600	3345700	3656900	3993600	3946700	3915300
pmb2653	649.1	145	650.227	C24H42O20	[M-H]-	D(+)-Melezitose O-rhamnoside	Others	Saccharides and Alcohols	-	3	459240	396560	358190	227170	70115	328710	216070	199220	292890	635600	521320	646780	150780	195880	248610	285670	365460	340850	314220
Hmgp002953	653.17	331.08	652.164	C29H32O17	[M+H]+	Tricin-7-O-(2''-O-rhamnosyl)galacturonide	Flavonoids	Flavonoid	89915-54-8	1	939460	799130	811180	1463100	1270900	1570400	391050	352360	376850	118860	125990	114160	956590	746290	730030	827450	726380	705580	895820
Lmsp004749	655.19	347.08	654.18	C29H34O17	[M+H]+	Syringetin-3-O-rutinoside	Flavonoids	Flavonoid	-	3	585950	443210	553590	1213100	922240	1133500	470160	270050	323990	99367	127810	94069	573020	554190	499840	471710	518210	579810	569050
Zmxp004503	655.18	331.06	654.18	C29H34O17	[M+H]+	Tricin-5,7-O-diglucoside	Flavonoids	Flavonoid	-	3	58919	38381	48432	79758	38441	49493	31818	21460	37734	8149.5	12918	16232	30196	52455	53149	39052	49918	26961	29608
Lmgp003803	655.19	331.08	654.18	C29H34O17	[M+H]+	5,7,4'-Trihydroxy-6,8-dimethoxyisoflavone-7-O-galactoside-rhamnose	Flavonoids	Isoflavones	-	1	21280	21913	24669	39634	27989	39646	21248	13450	32525	9	9	7098.8	33359	32517	19831	14528	26503	17013	21245
pmb0713	655.19	331.08	654.18	C29H34O17	[M+H]+	Tricin-7-O-(2''-O-glucosyl)glucoside	Flavonoids	Flavonoid	-	2	49419	42111	48049	101510	88388	75552	26263	20910	26314	29184	29919	30033	101560	135460	104020	52239	63328	60160	86336
pmb0739	659.2	331.08	658.19	C32H34O15	[M+H]+	Tricin-4'-O-(syringyl alcohol)ether-7-O-glucoside	Flavonoids	Flavonoid	-	2	22459	20757	21314	25484	21576	23751	18049	10668	15592	18589	13324	18668	21700	20154	27725	24223	25993	23101	25887
pmb0530	664.12	136.2	663.109	C21H27N7O14P2	[M+H]+	Nicotinic acid adenine dinucleotide	Nucleotides and derivatives	Nucleotides and derivatives	53-84-9	2	56595	58367	71687	45958	47840	48970	61474	49181	69706	79129	61078	66653	44724	53104	54883	48149	53677	49709	60805
pmb2819	665.1	218.1	666.201	C27H38O19	[M-H]-	O-Caffeoyl maltotriose	Phenolic acids	Phenolic acids	-	3	10507	8242.8	7946.9	13742	14075	12957	16933	11832	20098	32083	36425	43098	34100	35955	28483	27336	30197	25184	26794
Lmqn000213	665.21	341.11	666.222	C24H42O21	[M-H]-	Stachyose	Others	Saccharides and Alcohols	470-55-3	3	80614	157140	44644	169940	80322	215440	97965	55089	121260	29149	31658	55238	72401	106610	57737	75375	77187	73901	86797
mws1593	665.21	161	666.222	C24H42O21	[M-H]-	D-Maltotetraose	Others	Saccharides and Alcohols	34612-38-9	2	104440	152900	36805	140670	59853	145690	57324	34158	58292	25216	54031	35120	74150	83353	35578	49896	41021	67498	70950
mws4163	665.21	485.3	666.222	C24H42O21	[M-H]-	Nystose	Others	Saccharides and Alcohols	13133-07-8	1	63635	89443	53530	80134	91980	84627	67863	56404	53009	43125	57803	22223	93611	58128	59556	62682	56803	74945	86327
pmb0725	669.18	331.08	668.174	C33H32O15	[M+H]+	Tricin-7-O-(2''-feruloyl)glucoside	Flavonoids	Flavonoid	-	2	47274	38754	37639	49126	46420	47519	34546	31709	29377	27496	16107	16639	33196	29319	30702	19107	23424	25839	27925
pmb0475	671.18	509	670.174	C29H34O18	[M+H]+	Gallic acid-4-O-(6'''-feruloyl)sophoroside	Tannins	Tannin	-	1	14295	10706	29040	30728	20082	17155	18576	16431	26380	24994	17254	2881.8	77917	94258	37792	26432	35696	39365	27857
Hmcp001628	671.18	347.07	670.175	C29H34O18	[M+H]+	Limocitrin-3,7-di-O-glucoside	Flavonoids	Flavonoid	-	3	26957	16239	29124	38592	24352	27654	33709	17911	16630	3956.8	5256.5	7261	9278.5	15300	28309	11957	19260	18596	17228
Zmzp006906	673.19	331.08	672.184	C36H32O13	[M+H]+	Tricin-4'-O-[β-guaiacyl-(9''-O-p-coumaroyl)glycerol]ether	Flavonoids	Flavonoid	-	1	321080	244080	205100	529270	394970	351820	319830	227750	306030	332310	327670	334140	392190	416860	416300	369760	366210	354720	384240
pmp001276	677.37	677.37	676.367	C33H56O14	[M+H]+	1-Linolenoyl-rac-glycerol-diglucoside	Lipids	Free fatty acids	-	1	7974300	7894000	7096000	7586900	7676900	8152700	4138200	4621200	4434800	9524500	8054000	9102700	8576200	8221900	7530600	7066100	7983400	8152000	9330300
Lmhp008513	677.37	261.22	676.367	C33H56O14	[M+H]+	2-α-Linolenoyl-glycerol-1,3-di-O-glucoside	Lipids	Glycerol ester	-	2	8548.9	10165	9363.3	5768.1	7966.5	6842.1	3419	3891.8	1878.6	7831.7	8218.2	5698.3	12133	7733.8	11608	6415.6	11814	12272	11946
Lmhp008744	677.37	261.22	676.367	C33H56O14	[M+H]+	1-α-Linolenoyl-glycerol-2,3-di-O-glucoside	Lipids	Glycerol ester	-	2	8937.9	3833.3	10674	9508.7	6299.4	7858.6	1658.7	3471.5	4367.1	6150.9	5836.6	6846.5	14787	6286.8	11125	5278.7	8451.5	12471	9904.5
pmp001271	679.39	263.24	678.383	C33H58O14	[M+H]+	1-Linoleoyl-sn-glycerol-diglucoside	Lipids	Free fatty acids	-	1	223210	186520	224910	224150	166760	245710	91123	145700	69567	217000	173070	180920	335470	272670	222250	221990	251650	171490	205280
Lmhp009190	679.39	263.24	678.383	C33H58O14	[M+H]+	2-Linoleoylglycerol-1,3-di-O-glucoside	Lipids	Glycerol ester	-	1	280620	195200	213070	232230	204840	253020	87991	99627	82666	174240	189610	170230	294130	212170	209650	180520	255740	190370	162400
Lmhp009384	679.39	263.24	678.383	C33H58O14	[M+H]+	1-Linoleoylglycerol-2,3-di-O-glucoside	Lipids	Glycerol ester	-	2	319030	152890	203060	249410	161620	245330	87353	95076	96435	201760	248500	164320	268060	298530	224990	254370	267540	224180	162070
pmb1312	689.21	331.08	688.2	C33H36O16	[M+H]+	Tricin-4'-O-(guaiacylglycerol)ether-7-O-glucoside	Flavonoids	Flavonoid	-	1	155750	228830	273430	305650	241550	443490	296980	94306	282380	196090	128560	83859	355640	821440	282170	212230	167400	220190	234000
Lmjn003562	693.2	175.04	694.211	C32H38O17	[M-H]-	3,6'-Diferuloylsucrose	Phenolic acids	Phenolic acids	107172-40-7	3	160480	127240	113040	138180	187750	155240	127560	138020	103280	150910	155070	163590	102730	75848	92641	116570	127060	94727	100790
pmb0738	699.19	331.08	698.185	C34H34O16	[M+H]+	Tricin-7-O-(2''-Sinapoyl)glucoside	Flavonoids	Flavonoid	-	2	57857	55954	53731	84169	61324	73508	56154	34754	40776	40228	31699	24327	28412	30899	23301	30515	38580	28299	30131
pmb3039	703.13	329.2	704.138	C35H28O16	[M-H]-	Tricin-4'-O-oxalic acid-7-O-(p-coumaroyl)shikimic acid	Flavonoids	Flavonoid	-	2	151860	126860	107140	258330	166130	173360	99853	85822	99244	164620	166750	153920	164360	196870	167720	193840	199720	165850	201350
pmb0680	741.2	147.3	740.195	C36H36O17	[M+H]+	Vitexin-7-O-(6''-p-coumaroyl)glucoside	Flavonoids	Flavonoid carbonoside	-	1	7348.2	6585	13202	12332	10526	4392.5	11576	7334.5	8018.8	731.5	4394.2	4421.5	21123	29910	19648	17408	18885	20737	17162
Zmhp003322	741.2	433.11	740.195	C36H36O17	[M+H]+	Isovitexin-2''-O-(6'''-p-coumaroyl)glucoside	Flavonoids	Flavonoid	-	3	26303	17041	13376	17582	28573	19052	9133	4851.2	6375.8	12192	12151	19722	18567	13249	13306	10908	9785.5	17552	12748
Lmyp003837	741.22	313.07	740.216	C33H40O19	[M+H]+	Isovitexin-7-O-glucoside-2''-O-rhamnoside	Flavonoids	Flavonoid carbonoside	-	3	10286	9	5844.2	9	9	5131	4396	4395.5	10243	2894.5	706.25	1450.5	14576	10976	8028.5	9435	16830	6573.2	9478.5
pmb2981	739.21	563.2	740.216	C33H40O19	[M-H]-	Vitexin-7-O-rutinoside	Flavonoids	Flavonoid	-	1	9120.8	8106	9757.8	23773	18170	8656.2	5354.8	6744.2	6104.2	1535.2	511.5	505.5	5586.8	9228.2	8161.8	7654.5	6502	5065	8611.5
MWSHY0010	743.24	435.14	742.232	C33H42O19	[M+H]+	Troxerutin	Flavonoids	Flavonoid	7085-55-4	3	39886	25883	27346	37012	23721	40967	16533	15098	24047	91282	114120	91382	25127	26580	5053.5	26918	20112	27697	28382
pme2651	742.1	620.1	743.075	C21H28N7O17P3	[M-H]-	NADP (Nicotinamide adenine dinucleotide phosphate)	Nucleotides and derivatives	Nucleotides and derivatives	53-59-8	3	21981	22233	34806	21297	24101	15892	22430	16662	24257	31794	32889	28591	14043	17189	23495	24510	18567	16279	25264
pmn001612	753.22	529.2	754.232	C34H42O19	[M-H]-	(3-Mustard acyl)-fructosyl-α-D-(6-mustard acyl)glucoside	Phenolic acids	Phenolic acids	-	1	53499	61979	50603	53970	54903	56320	49684	35496	34326	100240	74546	66921	79088	51006	61985	63434	56984	51767	79138
MWSslk184	753.23	205.05	754.232	C34H42O19	[M-H]-	3,6'-Disinapoyl sucrose	Phenolic acids	Phenolic acids	139891-98-8	3	157630	157060	127940	151310	155110	126820	105630	107730	93309	255210	281120	253880	197870	133820	139560	173810	147390	158450	175130
pmb0660	757.2	147.1	756.19	C36H36O18	[M+H]+	Isoorientin-7-O-(6''-p-coumaroyl)glucoside	Flavonoids	Flavonoid carbonoside	-	2	11325	2812	7049.5	3512.2	3536.2	5646	13430	4234.5	9187.2	1420	3541.2	1420.2	32901	23346	7777.8	14131	11287	18391	11977
pmb0678	771.21	177.1	770.206	C37H38O18	[M+H]+	Vitexin-7-O-(6''-feruloyl)glucoside	Flavonoids	Flavonoid carbonoside	-	1	1425700	1020300	1086800	1420500	1323000	1399600	585120	361360	487870	198850	237440	144290	1126600	971400	723860	842030	748740	1000900	1020600
Lmgp004332	785.25	331.08	784.243	C35H44O20	[M+H]+	5,7,4'-Trihydroxy-6,8-dimethoxyisoflavone-7-O-galactoside-rhamnose-rhamnose	Flavonoids	Isoflavones	-	1	85430	57730	68934	74846	72474	99130	46630	52643	48877	14836	17686	27256	25067	33347	42986	25904	34058	26652	33340
MWSmce598	829.28	325.11	828.275	C30H52O26	[M+H]+	Maltopentaose	Others	Saccharides and Alcohols	34620-76-3	3	60627	73365	36234	68527	61249	75726	71212	53420	42167	64196	48652	44535	70757	41800	63488	40086	43656	34895	60646
Lmdn000248	827.27	665.22	828.275	C30H52O26	[M-H]-	Verbascose	Others	Saccharides and Alcohols	546-62-3	2	18238	32902	9229.8	24224	11477	41873	8508.5	10245	15130	7186.5	5419.8	9177.2	14186	13398	6763.8	12828	13249	18795	15304
pmp000103	1155.28	867.21	1154.27	C60H50O24	[M+H]+	Arecatannin A2	Tannins	Tannin	79763-29-4	3	9	9	9	9	9	4746	9	9	9	305950	328710	291450	9	9	9	12643	14229	11501	18434
